# Supplementary material for: Efficiency evaluation of public hospitals in Saudi Arabia: an application of data envelopment analysis
Source: PubMed Central journal article supplement — BMJ Open. 2020 Jan 12;10(1):e031924. doi: 10.1136/bmjopen-2019-031924 (PMC7045210; doi:10.1136/bmjopen-2019-031924), 2020-01-12
Supplement: bmjopen-2019-031924.draft_revisions.pdf [file bmjopen-2019-031924.draft_revisions.pdf]

# BMJ Open

BMJ Open is committed to open peer review. As part of this commitment we make the peer review history of every article we publish publicly available.

When an article is published we post the peer reviewers' comments and the authors' responses online. We also post the versions of the paper that were used during peer review. These are the versions that the peer review comments apply to.

The versions of the paper that follow are the versions that were submitted during the peer review process. They are not the versions of record or the final published versions. They should not be cited or distributed as the published version of this manuscript.

BMJ Open is an open access journal and the full, final, typeset and author-corrected version of record of the manuscript is available on our site with no access controls, subscription charges or pay-per-view fees (<http://bmjopen.bmj.com>).

If you have any questions on BMJ Open's open peer review process please email [info.bmjopen@bmj.com](mailto:info.bmjopen@bmj.com)

# BMJ Open

## Efficiency evaluation of public hospitals in Saudi Arabia: An application of Data Envelopment Analysis

|                               |                                                                                                                                                                                                                                                                                                                                                                                                                                                                                                         |
|-------------------------------|---------------------------------------------------------------------------------------------------------------------------------------------------------------------------------------------------------------------------------------------------------------------------------------------------------------------------------------------------------------------------------------------------------------------------------------------------------------------------------------------------------|
| Journal:                      | <i>BMJ Open</i>                                                                                                                                                                                                                                                                                                                                                                                                                                                                                         |
| Manuscript ID                 | bmjopen-2019-031924                                                                                                                                                                                                                                                                                                                                                                                                                                                                                     |
| Article Type:                 | Research                                                                                                                                                                                                                                                                                                                                                                                                                                                                                                |
| Date Submitted by the Author: | 31-May-2019                                                                                                                                                                                                                                                                                                                                                                                                                                                                                             |
| Complete List of Authors:     | Alatawi, Ahmed; Liverpool School of Tropical Medicine, Health Economics, department of Clinical Sciences<br>Koronakos, Gregory; University of Pireaus, Department of Informatics<br>Niessen, Louis; Liverpool School of Tropical Medicine, Health Economics; University of Warwick, Dept of Health Sciences<br>Khan, Jahangir; Liverpool School of Tropical Medicine, Health Economics; International Centre for Diarrhoeal Disease Research Bangladesh, Health Systems and Population Studies Division |
| Keywords:                     | Technical efficiency, Data Envelopment Analysis, Saudi Arabia, Public hospital, General hospital efficiency                                                                                                                                                                                                                                                                                                                                                                                             |
|                               |                                                                                                                                                                                                                                                                                                                                                                                                                                                                                                         |

SCHOLARONE™  
Manuscripts

**Title****Efficiency Evaluation of Public Hospitals in Saudi Arabia: An Application of Data Envelopment Analysis****Authors:** Ahmed Alatawi<sup>\*,a</sup>, Gregory Koronakos<sup>b</sup>, Louis Niessen<sup>a,c</sup>, Jahangir Khan<sup>a,d</sup>**Affiliations:** <sup>a</sup> Liverpool School of Tropical Medicine, Health Economics, department of clinical sciences, Liverpool, United Kingdom.<sup>b</sup> University of Piraeus, Department of Informatics, Piraeus, Greece.<sup>c</sup> University of Warwick, Division of Health Sciences, Coventry, United Kingdom.<sup>d</sup> International Centre for Diarrheal Disease Research Bangladesh, Health Systems and Population Studies Division, Dhaka, Bangladesh.**1- Ahmed Alatawi\***, MSc, Pharm.D. (**Corresponding author**)

PhD Candidate - Health Economist

Health Economics Group, Department of Clinical Sciences, Room 1966-215, Liverpool School of Tropical Medicine, LSTM, Pembroke Place, Liverpool, L3 5QA, United Kingdom.

Mobile: +4407491496786

Fax: +44(0)151 705 3370

Email: [Ahmed.alatawi@lstmed.ac.uk](mailto:Ahmed.alatawi@lstmed.ac.uk)**2- Gregory Koronakos**, PhD

Postdoctoral in Operational Research

University of Piraeus, Department of Informatics.

Karaoli & Dimitriou 80, 185 34, Piraeus, Greece. Email: [gkoron@unipi.gr](mailto:gkoron@unipi.gr)**3- Louis Niessen**, Professor

Chair of Health Economics.

Health Economics Group, Department of Clinical Sciences, Room 1966-206, Liverpool School of Tropical Medicine, LSTM, Pembroke Place, Liverpool, L3 5QA, United Kingdom.

Tel: +44 (0)151 705 3779. Email: [louis.niessen@lstmed.ac.uk](mailto:louis.niessen@lstmed.ac.uk)**4- Jahangir Khan**, PhD

Senior Lecturer in Health Economics

Health Economics Group, Department of Clinical Sciences, Room 1966-215, Liverpool School of Tropical Medicine, LSTM, Pembroke Place, Liverpool, L3 5QA, United Kingdom.

Tel: +44 (0)151 702 9345. Email: [jahangir.khan@lstmed.ac.uk](mailto:jahangir.khan@lstmed.ac.uk)**Word count:** 5,160**Keywords:** Technical efficiency, Data envelopment analysis, Saudi Arabia, Public hospitals, General hospitals efficiency.

## Abstract

**Objective:** This study empirically estimated the technical efficiency, and causes of inefficiency, in public (ministry of health-affiliated) hospitals in Saudi Arabia.

**Design:** This study used data envelopment analysis (DEA) to estimate hospital efficiency, using input-orientation technology. The analysis adopted both CRS and VRS (constant and variable return to scale) as DEA models that used four inputs and six output variables from ministry of health databases for 2017. PIM-DEA 3.2 software was used for data analysis.

**Setting:** Ministry of health-affiliated general hospitals in the Kingdom of Saudi Arabia (KSA).

**Results:** Findings identified 75.8% (69 of 91) of public hospitals as technically inefficient. The average overall efficiency score was 0.76 (SD 0.23), indicating that hospitals could have inputs reduced by 24% without reduction in service provision. Small hospitals, with an average efficiency score of 0.79 (SD 0.23), were more efficient than medium-sized and large hospitals. Hospitals in central Saudi Arabia, with an average efficiency score of 0.83 (SD 0.18), were more efficient than those located in other geographic locations. More than half of all hospitals (62.6%) were operating sub-optimally in terms of the scale efficiency; efficient scale of operation was in medium-sized hospitals. Slack analysis identified overuse of physician's numbers (22.4%) and shortage of inpatient (14.2%) and outpatient (12.2%) services, as major causes of inefficiency.

**Conclusion:** Most hospitals in this study were technically inefficient and operating at sub-optimal scale size. Changes of the production capacity are required through improvement of the scale efficiency. This demands long-term effort and the co-operation of administrative authorities and health regulators at all levels of health care system. Policy adjustments are needed, to facilitate optimal use of medical capacity.

### Strengths and limitations of this study:

- We selected inputs and outputs that cover all variable dimensions that should be included in the efficiency model and agreed in the literature.
- The hospital mortality rate was included in output variables as an indicator of the health service quality and outcomes in the studied hospitals.

- This is the first research study of technical efficiency used input and output variables extracted from official databases of the Ministry of Health in Saudi Arabia.
- Data envelopment analysis was used to determine the extent of inefficiency and analyse the slacks in public hospitals.

## Introduction

Increasing demand for healthcare, and the expenditure required to provide efficient, equitable and effective healthcare systems, are global concerns. The Kingdom of Saudi Arabia (KSA) has experienced these recently, alongside substantial population growth, increased life expectancy and the proliferation of lifestyle-related disease. These have increased the demand for health services at a time of scant resource.<sup>1,2,3</sup>

Under article 31 of the national constitution, the KSA government guarantees free medical care to all citizens.<sup>4</sup> Thus, government finances the public sector annually, largely from revenue derived from oil and gas production.<sup>5</sup> Table 1 shows the proportion of national budget allocated to the KSA's ministry of health (MOH).<sup>6</sup>

The MOH is the primary provider of healthcare services in KSA, administering 60% of all provision.<sup>7</sup> It is the dominant provider of health services in the public sector.<sup>7,8</sup> Other government agencies, including the ministry of defence, the national guard and universities, share the remaining of healthcare provision, as does the private sector.<sup>5</sup> The MOH delivers primary, secondary and tertiary healthcare through 2,361 primary healthcare centres and 282 hospitals, administering 43,080 beds throughout the country.<sup>6</sup> Other MOH functions include strategic planning, formulation of health policy, supervision of all health service delivery programs and the monitoring and management of all other health-related activities.<sup>7</sup>

**Table 1:** Budget appropriations for the MOH with respect to government budget (SR = Saudi Riyal)

| Year | Government Budget Billion SR | MOH Budget Billion SR | Percentage of MOH to the government budget | No. of Hospitals | No. of Beds |
|------|------------------------------|-----------------------|--------------------------------------------|------------------|-------------|
| 2013 | 820                          | 54.3                  | 6.63%                                      | 268              | 38970       |
| 2014 | 855                          | 59.9                  | 7.02%                                      | 270              | 40300       |
| 2015 | 860                          | 62.3                  | 7.25%                                      | 274              | 41297       |
| 2016 | 840                          | 58.9                  | 7.01%                                      | 274              | 41835       |
| 2017 | 890                          | 67.7                  | 7.61%                                      | 282              | 43080       |

Source; Ministry of Health; Statistical yearbook, 2017.

1  
2  
3 During 2015, KSA government spending on health was 71.3% of the country's total health  
4 expenditure, which corresponds to 4.1% of GDP for that year.<sup>9</sup> Healthcare expenditure in  
5 KSA increased by 24.7% between 2013 and 2017.<sup>1,2,6</sup> While public spending on health in KSA  
6 is remarkably high in comparison to many high-income countries (71.3% for KSA versus  
7 61.2% for high-income countries), the number of hospital beds is considerably lower.<sup>3,9</sup> Just  
8 2.7 hospital beds per 1,000 people are allocated in KSA, whereas the average corresponding  
9 figure in other high-income countries is 8.9.<sup>3,9</sup> A previous study suggested that demand for  
10 healthcare services in KSA would increase by 145% by 2025 and require twice the number of  
11 hospital beds.<sup>10</sup>

12  
13  
14 Although much has been done to promote the efficient use of resources, this has proven  
15 insufficient to meet the rising demand for healthcare in KSA.<sup>11</sup> Providers seem to find it very  
16 challenging to deliver adequate provision using current resources.<sup>4</sup> There seems to be an  
17 imbalance between health service availability and health spending, so better use of resources  
18 is necessary if KSA is to have an efficient and appropriate health system.<sup>11</sup>

19  
20  
21 Governments worldwide assess the efficiencies of their health sectors, to ensure that public  
22 funds are effectively utilized.<sup>12</sup> Efficiency evaluations have used a range of benchmarks and  
23 efficiency concepts, including technical, allocative, cost and overall efficiency.<sup>12</sup> Of these, the  
24 technical efficiency approach is most commonly used. This is based on Farrell's theory of  
25 1957, which introduced a measure of technical efficiency based on comparison of the inputs and  
26 outputs of set entities, called decision making units (DMUs).<sup>13</sup>

27  
28  
29 Hospital efficiency is crucial to the efficiency of the health system generally, as hospitals are  
30 key consumers of health resources.<sup>14,15</sup> Hanson et al. (2002) found that public hospitals  
31 consume around 40% of the total state health budget in many sub-Saharan African  
32 countries.<sup>14</sup> Public hospitals used almost 44% of national health spending in the United  
33 Kingdom in 2012/13.<sup>16</sup> In general, there is a scarcity of studies and empirical works on the  
34 efficiency of public hospitals, and that rarity is particularly acute in the context of KSA.<sup>17</sup>  
35 Systematic review of public hospital efficiency studies in the Gulf region and similar countries  
36 has shown the number of studies to be limited, as efficiency analysis is a novel approach to  
37 research in the Gulf, including KSA.<sup>17</sup>

38  
39  
40  
41  
42  
43  
44  
45  
46  
47  
48  
49  
50  
51  
52  
53  
54  
55  
56  
57  
58  
59  
60

1  
2  
3 The study presented here estimates the technical efficiency of MOH-administered general  
4 hospitals in KSA. It measures the efficiency of hospitals with respect to their capacities and  
5 geographic locations, and seeks to identify the causes of inefficiency, and estimates the target  
6 levels required of inefficient hospitals if they are to be efficient. This research provides  
7 information useful to decision-makers seeking to reform health policy, to optimise the use of  
8 health resources in public hospitals and consequently improve the efficiency of healthcare  
9 systems.  
10  
11  
12  
13  
14  
15  
16

## 17 Methods

### 18 Data Envelopment Analysis

19 Hospital efficiency has hitherto been measured mainly by frontier analysis methods, either  
20 through non-parametric data envelopment analysis (DEA) or as parametric stochastic frontier  
21 analysis (SFA).<sup>12</sup> These methods compare hospital performance with an estimated efficient  
22 frontier comprising the best-performing hospitals.<sup>18,19</sup>  
23  
24  
25  
26  
27

28 Data envelopment analysis has for many years been the most commonly-used technique for  
29 measuring relative efficiency in healthcare.<sup>15,20</sup> Systematic reviews of efficiency studies have  
30 often found DEA to be the predominant method of public hospital efficiency assessments  
31 among studies reviewed.<sup>15,17,20</sup> Hollingworth et al. (2003, 2008) found that DEA was used in  
32 around the half of studies, a further fifth used DEA in with some form of secondary  
33 regressions.<sup>15,20</sup> Another review<sup>19</sup>, of efficiency in Iranian hospitals, found DEA was applied in  
34 all reviewed studies; three of those studies also used SFA to estimate efficiency scores. A  
35 systematic review of health system efficiency studies in OECD countries<sup>21</sup> found DEA applied  
36 in 64% of studies. Use of DEA is justified by its ability to handle multiple inputs and outputs in  
37 different units of assessment, and its functional flexibility of practical application.<sup>12,22</sup>  
38  
39  
40  
41  
42  
43  
44  
45  
46

47 Data envelopment analysis is a non-parametric approach that uses linear programming  
48 technique to analyse the relative efficiencies of individual DMUs, based on their multiple  
49 inputs and outputs, evaluated as the ratio of the total weighted output to the total weighted  
50 input.<sup>22,23</sup> Several DEA models have been developed to analyze the efficiency based on  
51 Farrell's concept<sup>13</sup>. These include the CCR model developed by Charnes, Cooper and Rhodes<sup>24</sup>,  
52 which assumes that production has constant returns to scale (CRS), and the BCC model  
53 developed by Banker, Charnes and Cooper<sup>25</sup>, which assumes production has a variable return  
54 to scale (VRS).<sup>13</sup> The choice of CCR or BCC model depends on the context, level and  
55  
56  
57  
58  
59  
60

1  
2  
3 perspective of analysis as well as the technology linking the inputs to outputs in the  
4 transformation process.<sup>12</sup>  
5  
6

7 Generally, the CCR model — whereby the efficiency frontier has a constant slope (CRS), which  
8 means that any change in the outputs is a result of proportional change in the inputs — is  
9 suggested when DEA analysis is conducted from the decision-maker's point of view that aims  
10 to measure efficiency regardless of managerial factors.<sup>26</sup> However, efficiency assessment by  
11 the CCR model may be affected if the DMUs are not operating on the optimal scale, since CRS  
12 does not distinguish between the scale and pure (managerial) technical efficiency.<sup>27</sup> If the  
13 efficiency analysis considers a managerial perspective, a BCC technology assumption will be  
14 appropriate to understand if a scale of operations or provider's practice affects  
15 productivity.<sup>26,28</sup> Scale efficiency is defined as a ratio of CRS to VRS efficiency scores and  
16 provides evidence whether the DMU is operating on the optimal scale size.<sup>15,21</sup> Furthermore,  
17 the efficiencies of DMUs can be comprehensively analysed using both CCR and BCC  
18 assumption for more realistic changes in production process, and implications in the real  
19 world.<sup>12,23</sup> Other systematic reviews<sup>21,29</sup> have reported similar findings where studies used  
20 both CCR and BCC assumptions in efficiency measurements.  
21  
22  
23  
24  
25  
26  
27  
28  
29  
30  
31  
32

33 The most commonly-used orientations in DEA analysis are input orientation (i.e. minimization  
34 of inputs with the given amount of outputs) and output orientation (i.e. inputs are held  
35 constant and outputs are proportionally increased).<sup>23</sup> Previous empirical studies<sup>27</sup> have  
36 argued that hospitals have relatively little control over their outputs (for example, expanding  
37 surgical operations), but more opportunities to reduce the inputs (e.g. medical devices),  
38 where they have the social responsibility to provide medical treatment to the public in  
39 general. Most studies thus adopted the input-oriented model for efficiency estimations of  
40 hospitals.<sup>21,30</sup> This argument is supported by systematic reviews of efficiency  
41 measurements.<sup>29</sup> However, few studies have applied output orientation in response to the  
42 strategic health plans of the countries aiming to expand healthcare provision during a specific  
43 period.<sup>31,32,</sup>  
44  
45  
46  
47  
48  
49  
50  
51  
52  
53

54 Considering the arguments in previous studies regarding orientation of efficiency analysis,  
55 this study used input orientation, both CCR (CRS) and BCC (VRS) models were applied. The  
56 current DEA analysis has formulated a linear fractional program as the following equation;  
57  
58  
59  
60



$$\max h_o = \frac{\sum_{r=1}^s r = 1 U_r Y_{r0}}{\sum_{i=1}^m i = 1 V_i X_{i0}}$$

Subject to

$$\frac{\sum_{r=1}^s r = 1 U_r Y_{rj}}{\sum_{i=1}^m i = 1 V_i X_{ij}} \leq 1; \quad j = 1, \dots, n$$

$U_r \geq 0, r = 1, \dots, s. V_i \geq 0, i = 1, \dots, m,$

where  $s$  is the number of outputs;  $U_r$  the weight of output  $r$ ;  $Y_{r0}$  the amount of output  $r$  produced by the hospital  $j$  under evaluation;  $n$  is a number of hospitals;  $m$  the number of inputs;  $V_i$  the weight of input  $i$ ;  $X_{i0}$  the amount of input  $i$ , used by the hospital,  $j$ .

Performance improvement management software (PIM-DEA version 3.2) was used for DEA analysis.<sup>33</sup>

### Population and selection of sample

Public (MOH-affiliated) hospitals in KSA can be broadly classified into two groups, general hospitals and specialised hospitals. General hospitals provide a wide range of health services, while specialised hospitals deliver health services for a specific health condition or to a particular group of beneficiaries. As the application of DEA is based on a homogenous (comparative) sample that use similar inputs to produce similar outputs, we focused on examining the technical efficiency for general hospitals.<sup>12</sup>

Hollingsworth (2008) and Varabyova (2016) argued that sample hospitals should have similar types and health production activities, since the inclusion of divergent specialist units in the same sample will confound the results — frontier techniques are susceptible to outliers.<sup>20,21</sup> Specialised hospitals often lack types of secondary service, e.g. surgical operations rarely occur in psychiatric hospitals, and such hospitals, if included, will appear as inefficient while surgery is a considered as an output.<sup>19,20,29</sup> Specialised hospitals were therefore excluded from this analysis.

Similarly, small hospitals (with 50 beds or fewer) provide primary care services while lacking secondary and tertiary health services, and consequently miss a significant number of output variables (e.g. inpatient services, patient discharge, surgical operations, laboratory testing)

1  
2  
3 compared to bigger hospitals. This study eliminated smaller hospitals, to ensure greater  
4 homogeneity in performance evaluation across comparable units.<sup>12,23</sup>  
5  
6

7  
8 Ultimately, the homogenous sample used in the analysis included 21,528 out of 398,68 (54%)  
9 of the total active hospital beds provided by the MOH in KSA. We included in the assessment  
10 97 general hospitals and removed six hospitals, due to missing data. The data of hospital  
11 inputs and outputs for 2017 was collected by the lead author from official statistical,  
12 informational and research databases of Administration of Statistics and Information and  
13 Administration of Research and Studies, which affiliated of the MOH, following approval from  
14 the designated authority. Data collection took place from May to July 2018.  
15  
16  
17  
18  
19

20  
21 The sample hospitals were in 64 cities, affiliated to 20 administrative districts, located in five  
22 geographic regions, namely central, west, east, south and north regions. Hospitals were  
23 classified into four groups based on their capacity (number of beds): small (fewer than 200  
24 beds), lower-medium (200 to 299 beds), upper-medium (300 to 499 beds) and large (500 or  
25 more beds) hospitals, following Gok's<sup>26</sup> categorization. Figure 1 illustrates number of  
26 hospitals and hospital-beds in each category of capacity and locations.  
27  
28  
29  
30  
31  
32  
33  
34

35  
36  
37  
38  
39  
40  
41  
42  
43  
44  
45  
46  
47  
48  
49  
50  
51  
52  
53  
54  
55  
56  
57  
58  
59  
60  
Figure 1 to be inserted here

### Inputs and outputs

41 Selection of input and output variables is a crucial step in performance measurement,  
42 because the results of any efficiency assessment depend significantly on the variables used in  
43 the estimation models.<sup>34</sup> The literature has focused on labour (e.g. health professionals) and  
44 capital (e.g. number of beds), as input variables, while some studies included consumable  
45 resources.<sup>12,34</sup> The main categories of output used in healthcare-related efficiency studies  
46 were healthcare activities (e.g. number of outpatient visits, inpatient services, number of  
47 surgeries) and health outcomes (e.g. mortality rate).<sup>12, 19,21</sup>  
48  
49  
50  
51  
52  
53  
54

55 In the analyses performed for this study, hospital input and output variables for the DEA  
56 model were selected in the light of previous theoretical and empirical studies, and availability  
57 of data in the KSA context. Thus, four inputs and six outputs were chosen.  
58  
59  
60

The input variables chosen were: (1) number of hospital beds; (2) number of full-time physicians; (3) number of full-time nurses and (4) number of full-time allied health personnel (i.e. pharmacists, midwives, medical technicians, medical radiologists, physiotherapists) employed in the hospital. The output variables used in this study were: (1) outpatient visits (number of patients receiving outpatient treatment within a year); (2) discharged patients (number of patients receiving inpatient treatment within a year); (3) total number of surgical operations during the year; (4) number of radiological investigations conducted in hospital during the year; (5) number of laboratory tests during the year; (6) hospital mortality rate (ratio of inpatient deaths during hospitalization to the total number of inpatients that year). The last output variable was an indicator of health service quality and health outcomes in hospital, as argued by Sahin and Ozcan<sup>35</sup>. The inverse value for the mortality rate (one divided by mortality rate) was included as an output value in the model, considering the assumptions of linear programming of efficiency model, meaning that hospitals with higher mortality rate would have a smaller ratio as output values.<sup>35</sup>

The number of hospitals (DMUs in DEA context) should be at least two times larger than the sum of input and output variables.<sup>36</sup> However, Hollingsworth (2014)<sup>22</sup> suggested that the number of units used in efficiency assessment should be at least three times the combined counts of input and output variables. The current study assessed 91 hospitals, more than three times the combined number of input and output variables.

### Patient and Public Involvement

No patients were involved in this study, and we used secondary data from MOH databases.

### Results

Descriptive statistics, concerning the inputs and outputs of 91 general hospitals during 2017, are presented in Table 2. The average hospital size was 236.57 beds, with a range of 100 to 711 beds. Full-time physicians ranged from 38 to 894, with a mean of 212. The number of nurses was an average 495, but ranged from 74 to 1,930. Full-time allied health personnel ranged from 37 to 1,149, with an average of 280.

**Table 2:** Descriptive statistics of the inputs and outputs of the 91 hospitals

|               | Mean | Standard Deviation | Min | Max |
|---------------|------|--------------------|-----|-----|
| <b>Inputs</b> |      |                    |     |     |

|                          |           |             |        |           |
|--------------------------|-----------|-------------|--------|-----------|
| Hospital beds            | 236.6     | 137.6       | 100    | 711       |
| Physicians               | 212.3     | 168.7       | 38     | 894       |
| Nurses                   | 495.2     | 403.6       | 74     | 1,930     |
| Allied Health Personnel  | 280.1     | 219.1       | 37     | 1,149     |
| <b>Outputs</b>           |           |             |        |           |
| Outpatient visits        | 72,986.5  | 72,475.3    | 1,785  | 466,608   |
| Discharged patients      | 26,016.4  | 55,856.4    | 19     | 503,216   |
| Surgical operations      | 2,638.4   | 2,151.2     | 172    | 9,464     |
| Laboratory tests         | 965,840.8 | 1,095,415.6 | 794    | 5,512,774 |
| Radiology Investigations | 53,531.4  | 46,788.7    | 107    | 221,980   |
| Hospital mortality rate  | 0.0224    | 0.0212      | 0.0003 | 0.125     |

Turning to outputs, the average number of patient visits to outpatient departments was 72,986 and ranged from 1,785 to 466,608 visits. Discharged patients receiving inpatient services during 2017 averaged 26,016, ranging from 19 to 503,216. Surgical operations ranged from 172 to 9,464 with a mean of 2,638 surgeries per hospital. Means for laboratory and radiology tests were 965840 and 53531 respectively, during 2017. Average mortality rate was 2.24%.

Table 3 presents the results of DEA model, summary statistics of average technical (TE), pure technical (PTE) and scale (SE) efficiency scores, and the return to the operation scale of hospitals in each category.

**Table 3:** Technical efficiency scores, constant, increasing and decreasing returns to the scale

|                                                     | Technical efficiency | Pure technical efficiency | Scale efficiency | CRS [N (%)] | IRS [N (%)] | DRS [N (%)] |
|-----------------------------------------------------|----------------------|---------------------------|------------------|-------------|-------------|-------------|
| <b>All hospitals (n=91)</b>                         |                      |                           |                  |             |             |             |
| Mean                                                | 0.76                 | 0.87                      | 0.87             | 34 (37.4)   | 40 (44)     | 17 (18.6)   |
| Std. Dev.                                           | 0.23                 | 0.18                      | 0.18             |             |             |             |
| Min                                                 | 0.11                 | 0.30                      | 0.19             |             |             |             |
| No. full score                                      | 22 (24.2%)           | 47                        | 25               |             |             |             |
| <b>Large hospitals: &gt;=500 beds (n= 8)</b>        |                      |                           |                  |             |             |             |
| Mean                                                | 0.65                 | 0.75                      | 0.87             | 2 (25)      | 1 (12.5)    | 5 (62.5)    |
| Std. Dev.                                           | 0.27                 | 0.30                      | 0.13             |             |             |             |
| Min                                                 | 0.28                 | 0.30                      | 0.59             |             |             |             |
| No. full score                                      | 1 (12.5)             | 4                         | 1                |             |             |             |
| <b>Upper-medium hospitals: 300-499 beds (n= 22)</b> |                      |                           |                  |             |             |             |
| Mean                                                | 0.76                 | 0.80                      | 0.94             | 7 (31.8)    | 5 (22.7)    | 10 (45.5)   |
| Std. Dev.                                           | 0.19                 | 0.19                      | 0.07             |             |             |             |
| Min                                                 | 0.39                 | 0.41                      | 0.76             |             |             |             |

|                                                     |           |      |      |           |           |         |
|-----------------------------------------------------|-----------|------|------|-----------|-----------|---------|
| No. full score                                      | 3 (13.6)  | 7    | 3    |           |           |         |
| <b>Lower-medium hospitals: 200-299 beds (n= 22)</b> |           |      |      |           |           |         |
| Mean                                                | 0.73      | 0.79 | 0.90 | 10 (45.5) | 10 (45.5) | 2 (9.1) |
| Std. Dev.                                           | 0.25      | 0.19 | 0.18 |           |           |         |
| Min                                                 | 0.11      | 0.50 | 0.22 |           |           |         |
| No. full score                                      | 4 (18.2)  | 4    | 4    |           |           |         |
| <b>Small hospitals: &lt;200 beds (n= 39)</b>        |           |      |      |           |           |         |
| Mean                                                | 0.79      | 0.96 | 0.82 | 15 (38.5) | 24 (61.5) | 0 (0)   |
| Std. Dev.                                           | 0.23      | 0.09 | 0.22 |           |           |         |
| Min                                                 | 0.19      | 0.67 | 0.19 |           |           |         |
| No. full score                                      | 13 (33.3) | 31   | 13   |           |           |         |

The average, overall technical efficiency score for MOH general hospitals was 0.76, with a standard deviation (SD) of 0.23, which indicates that these hospitals could reduce use of all their inputs on average by 24% without any reduction in the number of services provided. The distribution of technical, pure technical and scale efficiency scores is given in Figure 2.

Figure 2 to be inserted here

The lowest technical efficiency score reported was 0.11, but 22 hospitals out of 91 (24.2%) were technically and scale efficient, indicating the inputs were optimally used. Among hospitals failing to reach the full efficiency score, 55 hospitals (60.4%) achieved efficiency scores of at least 0.50 efficiency (Figure2) and 14 hospitals (15.4%) reported efficiency scores below 0.50.

Average pure technical efficiency and scale efficiency scores were both 0.87, with (SD 0.18). Although 47 hospitals (52%) reported an efficient score on VRS (pure efficiency), only 25 (27%) hospitals reported full scores on the scale efficiency.

Return to the scale was measured by DEA, which indicated whether the rate of increase in outputs was made by the equal rate of increase in inputs. This revealed three scale-operation situations. These were: 1) constant return to scale (CRS) in 34 hospitals (37.4% of the sample), where equal increase in all production factors (inputs) led to the same amount of increase in production (outputs) — in other words, these hospitals were operating on the optimum, or

1  
2  
3 most productive, scale size (MPSS); 2) increasing returns to scale (IRS) in 40 hospitals (44%),  
4 where the increase in all production factors resulted in more production, and 3) decreasing  
5 returns to scale (DRS) in 17 hospitals (18.6%), meaning an equal increase in all production  
6 factors led to less production. However, hospitals that were operating on either IRS or DRS  
7 needed to alter their capacity to operate on the optimum scale size, which was required to  
8 achieve technical efficiency.  
9  
10  
11  
12  
13

14  
15 From the capacity perspective, small hospitals had higher levels of technical and pure  
16 technical efficiencies than medium-sized (both lower- and upper-medium) and large  
17 hospitals. Table 3 shows that small hospitals had, on average, overall technical efficiency of  
18 0.79 (SD 0.23); one-third of hospitals in this category were technically and on the scale  
19 efficient. Average technical efficiency of lower-medium hospitals was 0.73 (SD 0.25), with a  
20 higher percentage of inefficient hospitals (81.8%), than for small hospitals. Although upper-  
21 medium-sized hospitals reported a slightly higher average technical efficiency score of 0.76  
22 (SD 0.19), fewer hospitals in this category reported an efficient score, meaning a higher  
23 percentage of inefficiencies (86.4%). Large hospitals were the least efficient when compared  
24 to other categories. The average technical efficiency of large hospitals was 0.65 (SD 0.27), only  
25 one was technically efficient.  
26  
27  
28  
29  
30  
31  
32  
33  
34

35  
36 The average scale efficiency score of medium-sized hospitals was higher than for small and  
37 large hospitals. Regarding scale-efficiency scores, upper-medium ( $\theta = 0.94$ ) and lower-  
38 medium ( $\theta = 0.90$ ) sized hospitals operated at a more optimal scale than small ( $\theta = 0.82$ ) or  
39 large hospitals ( $\theta = 0.87$ ). Also, 45.5% of lower-medium hospitals operated on the most  
40 productive scale size (MPSS), followed by small hospitals (38.5%). However, most of the  
41 remaining hospitals in these categories, i.e. lower-medium (45.5%) and small size (61.5%)  
42 hospitals were operating on increasing the return to the scale. In contrast, most large  
43 hospitals (62.5%) showed decreasing return to the scale, and two of them were on CRS,  
44 indicating a need to downsize these hospitals to improve technical efficiency. Similarly, 45.5%  
45 of upper-medium-sized hospitals operated on DRS and one-third of this category were  
46 operating on MPSS (CRS).  
47  
48  
49  
50  
51  
52  
53  
54  
55

56 Table 4 shows the results of DEA efficiency scoring in a geographical context. Hospitals in the  
57 central region reported the highest average technical efficiency score of 0.83 (SD 0.18) ,  
58  
59  
60

followed by eastern hospitals with an average score of 0.80 (SD 0.28). Hospitals in western KSA reported the least average score, 0.68 (SD 0.20).

**Table 4** Technical efficiency scores and return to scale operations by location

|                                         | Technical efficiency | Pure technical efficiency | Scale efficiency | CRS [N (%)] | IRS [N (%)] | DRS [N (%)] |
|-----------------------------------------|----------------------|---------------------------|------------------|-------------|-------------|-------------|
| <b>South region hospitals (n= 22)</b>   |                      |                           |                  |             |             |             |
| Mean                                    | 0.75                 | 0.89                      | 0.83             | 9 (40.9)    | 9 (40.9)    | 4 (18.2)    |
| Std. Dev.                               | 0.25                 | 0.18                      | 0.23             |             |             |             |
| Min                                     | 0.11                 | 0.41                      | 0.22             |             |             |             |
| No. full score                          | 4 (18.2)             | 13                        | 4                |             |             |             |
| <b>East region hospitals (n =8)</b>     |                      |                           |                  |             |             |             |
| Mean                                    | 0.80                 | 0.85                      | 0.90             | 4 (50)      | 1 (12.5)    | 3 (37.5)    |
| Std. Dev.                               | 0.28                 | 0.21                      | 0.16             |             |             |             |
| Min                                     | 0.27                 | 0.50                      | 0.54             |             |             |             |
| No. full score                          | 1 (12.5)             | 4                         | 1                |             |             |             |
| <b>North region hospitals (n =17)</b>   |                      |                           |                  |             |             |             |
| Mean                                    | 0.75                 | 0.84                      | 0.90             | 7 (41.2)    | 9 (52.9)    | 1 (5.9)     |
| Std. Dev.                               | 0.28                 | 0.23                      | 0.20             |             |             |             |
| Min                                     | 0.19                 | 0.30                      | 0.19             |             |             |             |
| No. full score                          | 6 (35.3)             | 9                         | 6                |             |             |             |
| <b>Central region hospitals (n =24)</b> |                      |                           |                  |             |             |             |
| Mean                                    | 0.83                 | 0.89                      | 0.93             | 10 (41.7)   | 11 (45.8)   | 3 (12.5)    |
| Std. Dev.                               | 0.18                 | 0.16                      | 0.10             |             |             |             |
| Min                                     | 0.49                 | 0.50                      | 0.69             |             |             |             |
| No. full score                          | 8 (33.3)             | 12                        | 8                |             |             |             |
| <b>West region hospitals (n =20)</b>    |                      |                           |                  |             |             |             |
| Mean                                    | 0.68                 | 0.85                      | 0.81             | 4 (20)      | 10 (50)     | 6 (30)      |
| Std. Dev.                               | 0.20                 | 0.17                      | 0.17             |             |             |             |
| Min                                     | 0.37                 | 0.42                      | 0.46             |             |             |             |
| No. full score                          | 3 (15)               | 9                         | 3                |             |             |             |

The number of hospitals in the north (35.3%) and central (33.3%) regions with a full efficiency score was higher, as a proportion of samples, than other regions. Hospitals located in the eastern, western and southern regions had a higher percentage of inefficient hospitals. Both central and southern regions reported a higher pure-technical efficiency score of 0.89. In terms of average scale efficiency scores, central region hospitals ( $\Theta = 0.93$ ), and hospitals in the north- and east (both  $\Theta = 0.90$ ) were operating at more optimal scale than those in the west ( $\Theta = 0.81$ ) and south ( $\Theta = 0.83$ ). Half of the sample hospitals in the east region were

operating on the most productive scale size (MPSS), followed by hospitals in the central and north regions (both 41%). The findings also revealed that 52.9 % of north region hospitals were operating on IRS, while 37.5% of east region hospitals were operating on DRS.

The analysis identified slacks, which were either excess input utilization or shortages of output production. This would permit health regulators to determine inefficiently-used inputs or insufficiently-produced outputs. Table 5 shows the average amount of slack in hospitals deemed inefficient. These results represent the combined scores of slack for all inefficient hospitals, for each input and output. Table 5 also shows the percentage of change (slacks) in the number of inputs or outputs required to eliminate the inefficiencies and achieve target levels.

**Table 5** Slacks evaluation for inefficient hospitals

| <b>Input slacks</b>      | Mean (SD)          | Percentage of change |
|--------------------------|--------------------|----------------------|
| Hospital beds            | 48.4 (76.6)        | -20.4%               |
| Physicians               | 47.5 (72.6)        | -22.4%               |
| Nurses                   | 102.9 (173.1)      | -20.8%               |
| Allied Health Personnel  | 58.38 (98.3)       | -20.84%              |
| <b>Output slacks</b>     |                    |                      |
| Outpatient visits        | 8866.1 (23712)     | 12.2%                |
| Discharged patients      | 3700.6 (8214.2)    | 14.2%                |
| Surgical operations      | 282.6 (730.9)      | 10.7%                |
| Laboratory tests         | 66105.6 (140332.4) | 6.8%                 |
| Radiology Investigations | 2204.6 (6944.1)    | 4.1%                 |
| Mortality rate           | 0.006 (0.014)      | 21.7%                |

In terms of input, results show that an excess of physicians was the main cause of inefficiencies in public hospitals. A feasible, achievable reduction in the number of physicians was on average 22.38 % of the current values (compared with the amounts given in Table 2). The next most substantial slack was observed in allied health personnel, at 20.84%. Surpluses of hospital beds and nurses were also important causes of inefficiency and should be reduced on average by 20.44% and 20.77%, respectively.

The analysis also showed that significant savings could potentially be made via outputs. To improve technical efficiency, the average number of outpatients and hospitalised inpatients could be increased by 12.15 % and 14.22 % respectively, to meet targets. Surgical operations



1  
2  
3 within these hospitals should be increased by 10.7%. Laboratory and radiological tests should  
4 be increased on average by 6.84% and 4.12%, respectively.  
5  
6

7 Furthermore, the quality of health services in public hospitals would have improved with a  
8 decrease in the hospital mortality rate, from 0.0224 to 0.0162. A significant improvement in  
9 service quality, reflected in the mortality rate, was needed for hospitals to attain efficient use  
10 of resources. Thus, public hospitals should consider the need to deliver health services to a  
11 greater volume of patients, through effective utilization of their existing resources.  
12  
13  
14  
15  
16

## 17 Discussion

18 This study evaluated the technical efficiency of public hospitals affiliated to the KSA's MOH,  
19 using data envelopment analysis. Analysis showed 75% of sample hospitals could not utilize  
20 their intact resources to generate specified outputs. The average technical efficiency score  
21 was 0.76, indicating that hospitals could produce their current level of outputs with 76% of  
22 inputs currently used, and thereby achieve efficiency. Efficiency scores ranged from 0.11 to  
23 1.00 (Figure 2), revealing considerable variations in efficiency scores among hospitals.  
24 Moreover, the average internal (pure technical efficiency) and external technical efficiency  
25 (scale efficiency) scores were both 0.87. This indicated that inefficiency was due to  
26 administrative failure to overcome external environmental factors, and inability to manage  
27 internal operations in the hospitals. Notably, a 2017 study by Helal and Elimam<sup>37</sup>, which  
28 assessed the efficiency of health services at districts level in KSA using MOH data from 2014,  
29 found an average efficiency score of 0.92, and 45% of the districts achieved the technical  
30 efficiency score of 1.00. An efficiency analysis of 20 public hospitals, under private sector  
31 management in KSA, found that 60% of the study sample had not achieved the efficient  
32 score, with an average score of 0.84.<sup>38</sup>  
33  
34  
35  
36  
37  
38  
39  
40  
41  
42  
43  
44  
45  
46

47 Results of the study presented here suggest that small hospitals were relatively more  
48 technically efficient than medium-sized and large hospitals (Table 2). Other efficiency studies  
49 have reported similar findings: Gok<sup>26</sup> found that small hospitals achieved higher efficiency  
50 scores than medium-sized and large ones. This might be due to the differing locations and  
51 missions of small and large hospitals.<sup>26,28</sup> In this study's sample, small hospitals were mainly  
52 in peripheral cities and towns, which lacked other sources of public or private healthcare.  
53 Service provision in those hospitals might be relatively high compared to the health resources  
54  
55  
56  
57  
58  
59  
60

1  
2  
3 used. Large hospitals (500 or more beds) tended to be in larger cities in urban areas, where  
4 many other health providers shared the healthcare of much of the urban population, which  
5 might generate a relatively decreased level of production in respect of inputs used.  
6  
7

8  
9 Regarding the different missions (activities) of each category, large hospitals consumed a high  
10 amount of health resources to meet the various requirements of comprehensive care.<sup>26</sup> Since  
11 some of these were teaching hospitals, however, teaching activities were not counted in the  
12 outcome measurements.<sup>26,34</sup> In such large hospitals, treatment processes might be more  
13 complicated, and some of the productions of these hospitals could not be assessed in the  
14 hospital outcomes.<sup>39</sup>  
15  
16  
17  
18  
19

20  
21 It had been argued by Afzali<sup>34</sup> and Hollingsworth<sup>15</sup> that many hospital databases are  
22 compromised by insufficient data on a broad range of hospital functions and care, e.g.  
23 preventive care, health promotion, staff development activities. Thus, improving hospital's  
24 databases through high quality data collection and processing techniques — including data  
25 from different health provision levels, capturing valid data that reflects the severity of cases  
26 and related health services, quality of care and pattern of activities — is very important.<sup>35,40</sup>  
27 Such improvement would facilitate further efficiency research by indicating weaknesses in  
28 healthcare production processes and consequently would guide policy-makers in potential  
29 reforms of health policy and directives.  
30  
31  
32  
33  
34  
35  
36

37  
38 This study found 57 hospitals (62.6%) operating on non-optimal scale size; 44% were  
39 operating on the IRS, while 18.6% showed DRS (Table 3). This indicated that the efficiency of  
40 healthcare in KSA might be improved through downsizing of hospitals on DRS and reallocating  
41 these inputs to the hospitals operating in the IRS. Moreover, five out of eight large hospitals  
42 (500 or more beds) were operating on DRS, implying that to improve efficiency, they needed  
43 to reduce their production capacity. This is supported by other research findings.<sup>41</sup>  
44  
45  
46  
47  
48  
49

50 This study found that 61.5% of small hospitals had been operating on IRS, none was on DRS,  
51 suggesting the increase of capacity (inputs) of this category should be increased by  
52 reallocating resources from the larger hospitals, thereby improving efficiency. The efficient  
53 scale of public hospitals was in medium-sized establishments (200 to 499 beds). Although half  
54 of the hospitals located in the east were operating on the most productive scale size (CRS),  
55 three were operating on DRS. Around 53% of the hospitals in the north were operating on  
56  
57  
58  
59  
60

1  
2  
3 IRS, whereas 30% of western region hospitals, which reported the lowest efficiency scores,  
4 were operating on DRS.  
5

6  
7 Atilgan<sup>42</sup> reported similar, location-specific, differences in efficiency scores for general MOH  
8 hospitals in Turkey. This could be due to case mix and/or case severity differences between  
9 hospitals, and it might be that hospitals in the west region might be treating more severe  
10 cases.<sup>19</sup> Another explanation could be that hospitals in this region consumed more inputs in  
11 anticipation of the annual pilgrimage season, for which government allocates more budget to  
12 such hospitals.  
13  
14

15  
16 Regardless of capacity or location-based performance variations, improving the scale  
17 efficiency of hospitals would require long-term effort, reflected in amendments to health  
18 policies, strategic plans and the autonomy of hospital-managers.<sup>41</sup> The prevailing ability of  
19 patients to access health services should not be compromised while reallocating the  
20 resources to the other hospitals until Pareto optimality is achieved.<sup>12</sup>  
21  
22

23  
24 In this study, slack analysis was conducted to identify surpluses in inputs used and shortages  
25 in outputs produced. The use of DEA can identify sources of inefficiency, helping hospital  
26 managers and health policy-makers to reach informed decisions.<sup>28</sup> The analysis showed that  
27 the number of full-time physicians was the most notable reason for inefficiency, with an  
28 average excess of 22.4%, from an input perspective. Other inputs among labour variables that  
29 showed a surplus in use were the number of nurses and the number of allied health  
30 personnel, in addition to excess number of hospital beds (capital variable). Analysis revealed  
31 a shortage of outputs production, e.g. hospitals needed to increase the number of outpatients  
32 and hospitalized inpatient services on average by 12.2% and 14.2% respectively, to be  
33 efficient. Given the previous findings, health policy-makers might consider redeploying their  
34 labour forces from inefficient hospitals to more efficient ones.<sup>28,41</sup> Public hospitals should  
35 effectively utilize existing beds to increase efficiency. For example, in this study many large  
36 hospitals had been operating on DRS; however, most of the small hospitals were operating  
37 on IRS. Healthcare administrators should assess the legal conditions and regulations for the  
38 effective use of medical capacity in light of the findings of this slack analysis.  
39  
40  
41  
42  
43  
44  
45  
46  
47  
48  
49  
50  
51  
52  
53  
54  
55

56  
57 Selecting the input and output variables for this study was challenging, due to our  
58 dependence on the availability of data. However, we selected the inputs and outputs that  
59  
60

1  
2  
3 cover all variable dimensions that should be included in the efficiency model and are agreed  
4 in the literature.<sup>12</sup> We also included hospital mortality rate as an indicator of the health  
5 service quality and outcomes. Six hospitals were removed from the sample because they did  
6 not have records of the required inputs and outputs needed for this study. Despite a few  
7 limitations, the study site (KSA), and data sources might create strong interest among policy-  
8 makers, stakeholders, researchers and academics. This is the first research study of technical  
9 efficiency based on official data from KSA, that has considered public hospital capacities and  
10 geographical locations. We encourage further research in this area, to provide more specific  
11 results with a spotlight on inefficiency causes, given the goals, functions and strategic plans of  
12 public hospitals in KSA.  
13  
14  
15  
16  
17  
18  
19  
20  
21

### 22 Concluding Remarks

23 Given the scarcity of resources, growing expenditure on health and demand for health  
24 services, more attention should be paid to improving the efficiency of healthcare by better  
25 utilization of current resources. In this study, inefficiency existed in most public hospitals, and  
26 these could reduce their inputs by 24% without any reduction in service provision. Small  
27 hospitals and hospitals in the central region of KSA were relatively more efficient. A high  
28 proportion of hospitals were operating at non-optimal scale size, while an efficient scale of  
29 operation was observed in medium-sized hospitals. This finding suggests it would be helpful  
30 to adjust production capacity by downsizing hospitals operating on DRS and reallocating the  
31 resources to hospitals on the IRS, as reflected in the scale analysis.  
32  
33  
34  
35  
36  
37  
38  
39  
40

41 Any improvement in scale efficiency would require long-term efforts through adjustments to  
42 health policies and goals as well as by securing the autonomy of hospital management. This  
43 will require collaboration between health administrative, policy planning and daily operations  
44 management, to fill the administrative gap and thus overcome external environmental factors  
45 and manage internal hospital operations.  
46  
47  
48  
49

50 The slack analysis described here shows the surplus of physician numbers and a shortage of  
51 inpatient and outpatient services to be major causes of inefficiency, implying that health  
52 regulators might redeploy their labour forces for effective utilization of medical capacity. A  
53 possible reallocation of resource must take place without compromising patients' current  
54 access to public-funded health services.  
55  
56  
57  
58  
59  
60

## **Acknowledgement**

We are grateful for the Ministry of Education and the government of Saudi Arabia for unlimited support. The authors would like to thank of the Administration of Statistics and Information and the Administration of Research and Studies in the Ministry of Health for providing access to the hospital's databases. Special gratitude to Mr Nabil A. Othman and Ms Nuwayyir Alshalawi at Administration of Statistics and Information for their contributions through permitting to use the administration's access to the necessary databases to complete the data collection.

## **Contributors**

AA, GK, LN and JK contributed to conceptualizing the research question, study design and settings and literature search. AA contributed to data collection and variable extraction. AA, GK and JK conducted the data analysis, interpretation, and writing the manuscript. AA, GK, LN and JK contributed to writing, reviewing and revising the manuscript. All authors finally reviewed the manuscript critically and approved the final version for submission.

## **Funding**

There is no funding agency in the public, commercial or not-for-profit sectors to report for this submission.

## **Competing interest**

None declared.

## **Data sharing statement**

Data were extracted from the hospital databases at Administration of Statistics and Information in The Ministry of Health. Additional data are available if requested.

## **Ethics approval**

Ethics approval was obtained from the Ethics Committee of Institutional Review Board (IRB) of King Fahad Medical City, the Ministry of Health in Saudi Arabia (IRB log No. 18-166E).

## **Patient consent for publication**

Not required.

## References

1. Khoja T, Rawaf S, Qidwai W *et al.* Health care in Gulf Cooperation Council countries: a review of challenges and opportunities. *Cureus* 2017;9(8):e1586. DOI: 10.7759/cureus.1586.
2. Ardent Advisory & Accounting. *GCC healthcare sector report. A focus area for governments.* Abu Dhabi, UAE, 2015 Accessed: January 2018: DOI: <http://www.ardentadvisory.com/files/GCC-Healthcare-Sector-Report.pdf>
3. Ram P. Management of healthcare in the Gulf Cooperation Council (GCC) countries with special reference to Saudi Arabia. *International Journal of Academic Research in Business and Social Sciences* 2014; 4(12). DOI: 10.6007/IJARBS/v4-i11/1326.
4. Albejaidi F. Healthcare system in Saudi Arabia: an analysis of structure, total quality management and future challenges. *Journal of Alternative Perspectives in the Social Sciences* 2010;2(2):794-818.
5. Al-Homayan A, Shamsudin F, Subramaniam C, Islam R. Analysis of health care system — resources and nursing sector in Saudi Arabia. *Advances in Environmental Biology* 2013;7(9), pp. 2584-2592.
6. MOH portal.com. *2017 Annual Statistical Book* Available at: <https://www.moh.gov.sa/en/Ministry/Statistics/book/Documents/ANNUAL-STATISTICAL-BOOK-1438H.pdf> (Accessed Oct. 2018).
7. Almalki M, FitzGerald G, Clark M. Health care system in Saudi Arabia: an overview. *Eastern Mediterranean Health Journal* 2011;17(10).
8. MOH portal.com. *2015 Annual Statistical Book.* Available at: <https://www.moh.gov.sa/en/Ministry/Statistics/book/Documents/StatisticalBook-1436.pdf>
9. The World Bank. *2019 Country Data.* Available at: <https://data.worldbank.org/country/saudi-arabia> (accessed January 2019).
10. Mourshed M, Hediger V, Lambert T. Gulf Cooperation Council healthcare: challenges and opportunities. 2007; *Arab World Competitiveness Report (Part 5)*;55–64, World Economic Forum, Geneva, Switzerland 2007. DOI: <http://citeseerx.ist.psu.edu/viewdoc/download?doi=10.1.1.183.7279&rep=rep1&type=pdf>

- 1  
2  
3 11. MOH portal.com. *Ministry of Health Strategic Plan 2010–2020*. Available at:  
4 <https://www.moh.gov.sa/Portal/WhatsNew/Documents/OKIstragi260p.pdf>. (Accessed  
5 October 2018).  
6  
7
- 8  
9 12. Jacobs R, Smith P, Street A. *Measuring efficiency in health care: analytic techniques  
10 and health policy*. Cambridge; Cambridge University, p3–39/91–127, 2006.  
11
- 12  
13 13. Farrell MJ. The Measurement of Productive Efficiency. *Journal of the Royal Statistical  
14 Society* 1957;120(3):253–290.  
15
- 16  
17 14. Hanson K, Atuyambe L, Kamwanga J *et al*. Towards improving hospital performance in  
18 Uganda and Zambia: reflections and opportunities for autonomy. *Health Policy*  
19 2002;61, 73–94.  
20
- 21  
22 15. Hollingsworth B. Non-parametric and parametric applications measuring efficiency in  
23 health care. *Healthcare Management Science* 2003;6:203–218.  
24
- 25  
26 16. Kelly E, Stoye G, Vera-Hernández M. Public hospital spending in England: evidence  
27 from National Health Service administrative records. *Fiscal Studies* 2016;37(3-4),  
28 pp.433–459.  
29
- 30  
31 17. Alatawi A, Ahmed S, Niessen L *et al*. Systematic review and meta-analysis of public  
32 hospital efficiency studies in Gulf region and selected countries in similar settings.  
33 2018. (Manuscript submitted for publication)  
34
- 35  
36 18. Hussey P, de Vries H, Romley J *et al*. A systematic review of health care efficiency  
37 measures. *Health Services Research and Educational Trust* 2009; 44(3):784–805. DOI:  
38 10.1111/j.1475-6773.2008.00942.  
39
- 40  
41 19. Kiadaliri A, Jafari M, Gerdtham U. Frontier-based techniques in measuring hospital  
42 efficiency in Iran: a systematic review and meta-regression analysis. *BMC Health  
43 Services Research* 2013;13:312. <http://www.biomedcentral.com/1472-6963/13/312>  
44  
45
- 46  
47 20. Hollingsworth B. The measurement of efficiency and productivity of health care  
48 delivery. *Health Economics* 2008;17:1107–28. DOI: 10.1002/hec.1391  
49
- 50  
51 21. Varabyova Y, Müller JM. The efficiency of health care production in OECD countries: a  
52 systematic review and meta-analysis of cross-country comparisons. *Health Policy*  
53 2016;120(3) 252–263. <http://dx.doi.org/10.1016/j.healthpol.2015.12.005>  
54  
55
- 56  
57 22. Hollingsworth B. Evaluating efficiency of a health care system in the developed world.  
58 *Encyclopedia of Health Economics* 2014;1(18) pp.292-299.  
59  
60

- 1  
2  
3  
4  
5  
6  
7  
8  
9  
10  
11  
12  
13  
14  
15  
16  
17  
18  
19  
20  
21  
22  
23  
24  
25  
26  
27  
28  
29  
30  
31  
32  
33  
34  
35  
36  
37  
38  
39  
40  
41  
42  
43  
44  
45  
46  
47  
48  
49  
50  
51  
52  
53  
54  
55  
56  
57  
58  
59  
60
23. Cooper W, Seiford L, Tone K. Data envelopment analysis: a comprehensive text with models, applications, references and DEA-solver software. Springer, New York, p1-85, 2007. DOI: 10.1007/978-0-387-45283-8
  24. Charnes A, Cooper W, Rhodes E. Measuring the efficiency of decision-making units. *European Journal of Operational Research* 1978;2(6), 429–444 (1978)
  25. Banker R, Charnes A, Cooper W. Some models for estimating technical and scale inefficiencies in data envelopment analysis. *Management Science* 1984;30(9), 1078–1092
  26. Gok MS, Sezen B. Analyzing the ambiguous relationship between efficiency, quality and patient satisfaction in healthcare services: the case of public hospitals in Turkey. *Health Policy* 2013;111(3), pp 290-300.  
<http://dx.doi.org/10.1016/j.healthpol.2013.05.010>
  27. Chuang CL, Chang PC, Lin RH. An efficiency data envelopment analysis model reinforced by classification and regression tree for hospital performance evaluation. *Journal of Medical Systems* 2010;35(5):1075-83. Doi:10.1007/s10916-010-9598-5.
  28. Gok MS, Altindag E. Analysis of the cost and efficiency relationship: experience in the Turkish pay for performance system. *European Journal of Health Economics* 2015;16(5), pp 459–469. DOI 10.1007/s10198-014-0584-6
  29. Pelone F, Kringos, DF, Romaniello A *et al.* Primary care efficiency measurement using data envelopment analysis: a systematic review. *Journal of Medical Systems* 2015;; 39(1):156.
  30. O’Neill L, Rauner M, Heidenberger K *et al.* A cross-national comparison and taxonomy of DEA-based hospital efficiency studies. *Socio-Economic Planning Sciences* 2008;42:158–189.
  31. Mahate A, Hamidi S. Frontier efficiency of hospitals in United Arab Emirates: An application of data envelopment analysis. *Journal of Hospital Administration* 2016;5(1) pp7–16. DOI: 10.1007/s10916-014-0156-4
  32. Ramanathan R. Operations assessment of hospitals in the Sultanate of Oman. *International Journal of Operations and Production Management*, 2005;25(1) pp 39-54. DOI: 10.1007/s10916-014-0156-4
  33. Emrouznejad A, Thanassoulis E. *Performance Improvement Management Software: PIM-DEAsoft-V3.0 User Guide* May 2011; [www.DEAssoftware.co.uk](http://www.DEAssoftware.co.uk), Performance



- 1  
2  
3 Improvement Management Limited, UKISBN: 1-85449-412-2. Available at:  
4 <https://deazone.com/en/software>  
5  
6  
7 34. Afzali HH, Moss JR, Mahmood MA. A conceptual framework for selecting the most  
8 appropriate variables for measuring hospital efficiency with a focus on Iranian public  
9 hospitals. *Health Services Management Research* 2009;22(2):81–91. DOI:  
10 10.1258/hsmr.2008.008020  
11  
12  
13 35. Sahin I, Ozcan YA. Public sector hospital efficiency for provincial markets in Turkey.  
14 *Journal of Medical Systems* 2000;24(6), pp 307–320.  
15  
16 36. Dyson R, Allen R, Camanho A *et al*. Pitfalls and protocols in DEA. *European Journal of*  
17 *Operational Research* 2001;132(2):245–259.  
18  
19 37. Helal S, Elimam H. Measuring the efficiency of health services areas in Kingdom of  
20 Saudi Arabia using data envelopment analysis (DEA): a comparative study between  
21 the years 2014 and 2006. *International Journal of Economics and Finance* 2017;9(4)  
22 pp172–184.  
23  
24 38. Abou El-Seoud M. Measuring efficiency of reformed public hospitals in Saudi Arabia:  
25 An application of data envelopment analysis. *International Journal of Economics and*  
26 *Management Sciences* 2013;2(9):44–53.  
27  
28 39. Shahhoseini R, Tofighi S, Jaafaripooyan E *et al*. Efficiency measurement in developing  
29 countries: application of data envelopment analysis for Iranian hospitals. *Health*  
30 *Services Management Research* 2010;24(2):75–80. DOI: 10.1258/hsmr.2010.010017  
31  
32 40. Afzali HH, Moss JR, Mahmood AM. Exploring health professionals' perspectives on  
33 factors affecting Iranian hospital efficiency and suggestions for improvement.  
34 *International Journal of Health Planning and Management* 2011;26: e17–e29. DOI:  
35 10.1002/hpm.1035  
36  
37 41. Kiadaliri A, Haghparast-Bidgoli H, Zarei A. Measuring efficiency of general hospitals in  
38 the south of Iran. *World Applied Sciences Journal* 2011;13(6): 1310–1316.  
39  
40 42. Atilgan E. The technical efficiency of hospital inpatient care services: an application  
41 for Turkish public hospitals. *Isletme ve Ekonomi Arastirmalari Dergisi/Business and*  
42 *Economics Research Journal* 2016;7(2): 203–214. DOI: 10.20409/berj.2016217537.  
43  
44  
45  
46  
47  
48  
49  
50  
51  
52  
53  
54  
55  
56

## 57 Tables

58  
59  
60

1  
2  
3 Table 1: Budget appropriations for the MOH with respect to government budget (SR =  
4 Saudi Riyal)  
5

6  
7 Table 2: Descriptive statistics of the inputs and outputs of the 91 hospitals  
8

9  
10 Table 3: Technical efficiency scores, constant, increasing and decreasing returns to the  
11 scale  
12

13  
14 Table 4 Technical efficiency scores and return to scale operations by location  
15

16  
17 Table 5 Slacks evaluation for inefficient hospitals  
18

## 19 **Figures**

20  
21  
22 Figure 1: Number of hospitals and hospital beds in each capacity and geographical  
23 location, 2017.  
24

25  
26 Figure 2. Distribution of technical efficiency scores of the hospitals on technical (CRS),  
27 pure technical (VRS) and scale efficiencies.  
28  
29  
30  
31  
32  
33  
34  
35  
36  
37  
38  
39  
40  
41  
42  
43  
44  
45  
46  
47  
48  
49  
50  
51  
52  
53  
54  
55  
56  
57  
58  
59  
60

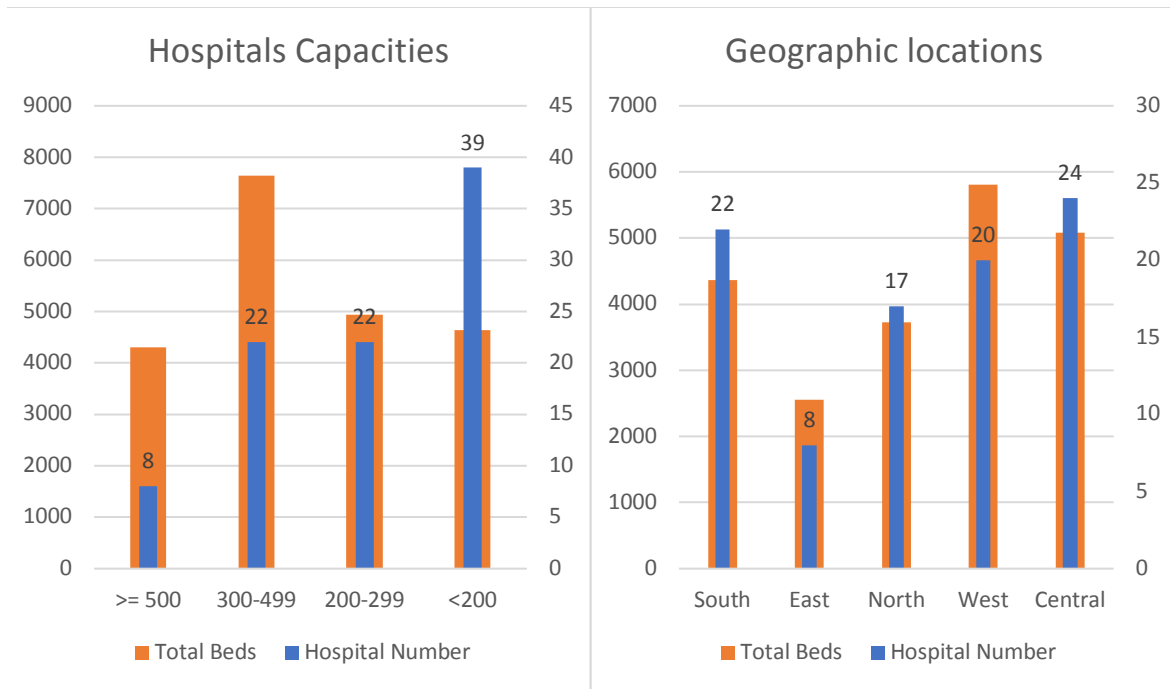

Figure 1: Number of hospitals and hospital beds in each capacity and geographical location, 2017.

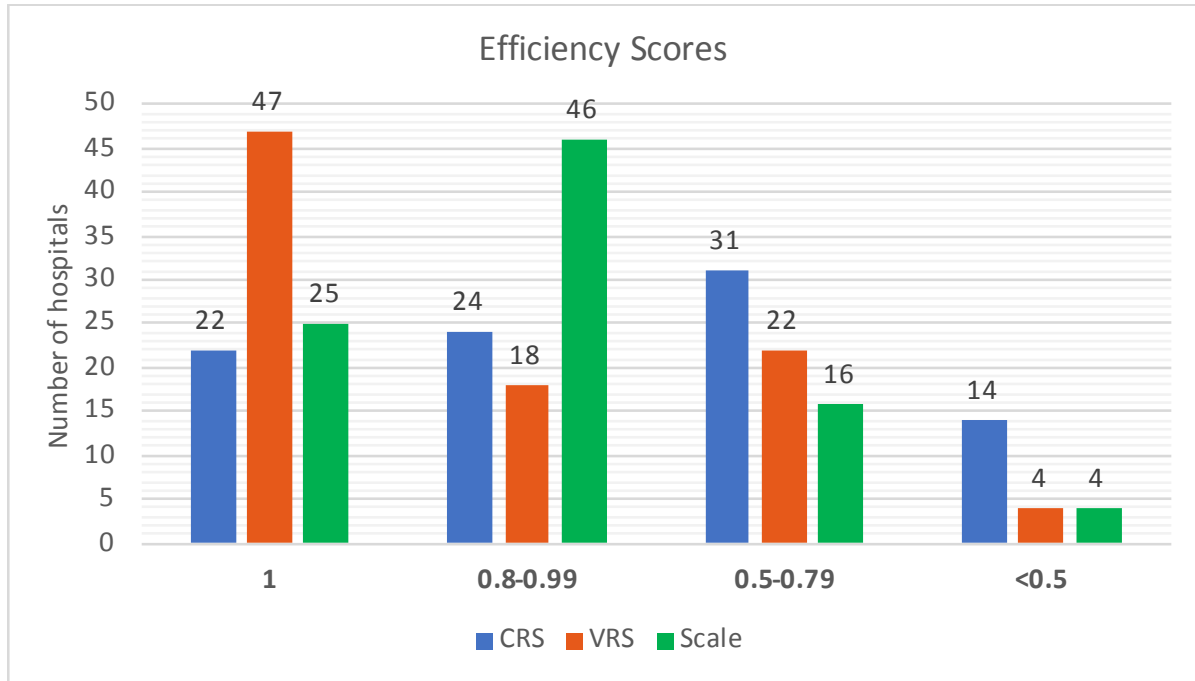

Figure 2. Distribution of technical efficiency scores of the hospitals on technical (CRS), pure technical (VRS) and scale efficiencies.

**STROBE 2007 (v4) Statement—Checklist of items that should be included in reports of *cross-sectional studies***

| Section/Topic                | Item # | Recommendation                                                                                                                                                                       | Reported on page # |
|------------------------------|--------|--------------------------------------------------------------------------------------------------------------------------------------------------------------------------------------|--------------------|
| <b>Title and abstract</b>    | 1      | (a) Indicate the study's design with a commonly used term in the title or the abstract                                                                                               | 0                  |
|                              |        | (b) Provide in the abstract an informative and balanced summary of what was done and what was found                                                                                  | 1                  |
| <b>Introduction</b>          |        |                                                                                                                                                                                      |                    |
| Background/rationale         | 2      | Explain the scientific background and rationale for the investigation being reported                                                                                                 | 2,3                |
| Objectives                   | 3      | State specific objectives, including any prespecified hypotheses                                                                                                                     | 4                  |
| <b>Methods</b>               |        |                                                                                                                                                                                      |                    |
| Study design                 | 4      | Present key elements of study design early in the paper                                                                                                                              | 4                  |
| Setting                      | 5      | Describe the setting, locations, and relevant dates, including periods of recruitment, exposure, follow-up, and data collection                                                      | 6,7                |
| Participants                 | 6      | (a) Give the eligibility criteria, and the sources and methods of selection of participants                                                                                          | n/a                |
| Variables                    | 7      | Clearly define all outcomes, exposures, predictors, potential confounders, and effect modifiers. Give diagnostic criteria, if applicable                                             | 7,8                |
| Data sources/<br>measurement | 8*     | For each variable of interest, give sources of data and details of methods of assessment (measurement). Describe comparability of assessment methods if there is more than one group | 4,5,6,7            |
| Bias                         | 9      | Describe any efforts to address potential sources of bias                                                                                                                            | n/a                |
| Study size                   | 10     | Explain how the study size was arrived at                                                                                                                                            | 7                  |
| Quantitative variables       | 11     | Explain how quantitative variables were handled in the analyses. If applicable, describe which groupings were chosen and why                                                         | 6,7,8              |
| Statistical methods          | 12     | (a) Describe all statistical methods, including those used to control for confounding                                                                                                | 5,6                |
|                              |        | (b) Describe any methods used to examine subgroups and interactions                                                                                                                  | 7                  |
|                              |        | (c) Explain how missing data were addressed                                                                                                                                          | 7                  |
|                              |        | (d) If applicable, describe analytical methods taking account of sampling strategy                                                                                                   | 8                  |
|                              |        | (e) Describe any sensitivity analyses                                                                                                                                                | n/a                |
| <b>Results</b>               |        |                                                                                                                                                                                      |                    |

|                          |     |                                                                                                                                                                                                              |            |
|--------------------------|-----|--------------------------------------------------------------------------------------------------------------------------------------------------------------------------------------------------------------|------------|
| Participants             | 13* | (a) Report numbers of individuals at each stage of study—eg numbers potentially eligible, examined for eligibility, confirmed eligible, included in the study, completing follow-up, and analysed            | n/a        |
|                          |     | (b) Give reasons for non-participation at each stage                                                                                                                                                         | n/a        |
|                          |     | (c) Consider use of a flow diagram                                                                                                                                                                           | n/a        |
| Descriptive data         | 14* | (a) Give characteristics of study participants (eg demographic, clinical, social) and information on exposures and potential confounders                                                                     | 8,9        |
|                          |     | (b) Indicate number of participants with missing data for each variable of interest                                                                                                                          | 7          |
| Outcome data             | 15* | Report numbers of outcome events or summary measures                                                                                                                                                         | 9,10,11,12 |
| Main results             | 16  | (a) Give unadjusted estimates and, if applicable, confounder-adjusted estimates and their precision (eg, 95% confidence interval). Make clear which confounders were adjusted for and why they were included | 9,10       |
|                          |     | (b) Report category boundaries when continuous variables were categorized                                                                                                                                    | 9,10,11    |
|                          |     | (c) If relevant, consider translating estimates of relative risk into absolute risk for a meaningful time period                                                                                             | n/a        |
| Other analyses           | 17  | Report other analyses done—eg analyses of subgroups and interactions, and sensitivity analyses                                                                                                               | 11,12      |
| <b>Discussion</b>        |     |                                                                                                                                                                                                              |            |
| Key results              | 18  | Summarise key results with reference to study objectives                                                                                                                                                     | 12,13,14   |
| Limitations              | 19  | Discuss limitations of the study, taking into account sources of potential bias or imprecision. Discuss both direction and magnitude of any potential bias                                                   | 15         |
| Interpretation           | 20  | Give a cautious overall interpretation of results considering objectives, limitations, multiplicity of analyses, results from similar studies, and other relevant evidence                                   | 14,15      |
| Generalisability         | 21  | Discuss the generalisability (external validity) of the study results                                                                                                                                        | 13,14,15   |
| <b>Other information</b> |     |                                                                                                                                                                                                              |            |
| Funding                  | 22  | Give the source of funding and the role of the funders for the present study and, if applicable, for the original study on which the present article is based                                                | 16         |

\*Give information separately for cases and controls in case-control studies and, if applicable, for exposed and unexposed groups in cohort and cross-sectional studies.

**Note:** An Explanation and Elaboration article discusses each checklist item and gives methodological background and published examples of transparent reporting. The STROBE checklist is best used in conjunction with this article (freely available on the Web sites of PLoS Medicine at <http://www.plosmedicine.org/>, Annals of Internal Medicine at <http://www.annals.org/>, and Epidemiology at <http://www.epidem.com/>). Information on the STROBE Initiative is available at [www.strobe-statement.org](http://www.strobe-statement.org).

# BMJ Open

## Efficiency evaluation of public hospitals in Saudi Arabia: An application of Data Envelopment Analysis

|                                 |                                                                                                                                                                                                                                                                                                                                                                                                                                                                                                         |
|---------------------------------|---------------------------------------------------------------------------------------------------------------------------------------------------------------------------------------------------------------------------------------------------------------------------------------------------------------------------------------------------------------------------------------------------------------------------------------------------------------------------------------------------------|
| Journal:                        | <i>BMJ Open</i>                                                                                                                                                                                                                                                                                                                                                                                                                                                                                         |
| Manuscript ID                   | bmjopen-2019-031924.R1                                                                                                                                                                                                                                                                                                                                                                                                                                                                                  |
| Article Type:                   | Original research                                                                                                                                                                                                                                                                                                                                                                                                                                                                                       |
| Date Submitted by the Author:   | 10-Aug-2019                                                                                                                                                                                                                                                                                                                                                                                                                                                                                             |
| Complete List of Authors:       | Alatawi, Ahmed; Liverpool School of Tropical Medicine, Health Economics, department of Clinical Sciences<br>Koronakos, Gregory; University of Pireaus, Department of Informatics<br>Niessen, Louis; Liverpool School of Tropical Medicine, Health Economics; University of Warwick, Dept of Health Sciences<br>Khan, Jahangir; Liverpool School of Tropical Medicine, Health Economics; International Centre for Diarrhoeal Disease Research Bangladesh, Health Systems and Population Studies Division |
| <b>Primary Subject Heading</b>: | Health economics                                                                                                                                                                                                                                                                                                                                                                                                                                                                                        |
| Secondary Subject Heading:      | Health economics, Health policy, Public health                                                                                                                                                                                                                                                                                                                                                                                                                                                          |
| Keywords:                       | Technical efficiency, Data Envelopment Analysis, Saudi Arabia, Public hospital, General hospital efficiency                                                                                                                                                                                                                                                                                                                                                                                             |
|                                 |                                                                                                                                                                                                                                                                                                                                                                                                                                                                                                         |

SCHOLARONE™  
Manuscripts

**Title****Efficiency Evaluation of Public Hospitals in Saudi Arabia: An Application of Data Envelopment Analysis****Authors:** Ahmed Alatawi<sup>\*,a,b</sup>, Gregory Koronakos<sup>d</sup>, Louis Niessen<sup>a,e</sup>, Jahangir A. M. Khan<sup>c,f</sup>**Affiliations:**<sup>a</sup> Liverpool School of Tropical Medicine, Department of Clinical Sciences, Liverpool, United Kingdom.<sup>b</sup> University of Al-Jouf, Pharmacy College, Department of Clinical Pharmacy, Skaka, Saudi Arabia.<sup>c</sup> Liverpool School of Tropical Medicine, Department of International Public Health, Liverpool, United Kingdom.<sup>d</sup> University of Piraeus, Department of Informatics, Piraeus, Greece.<sup>e</sup> University of Warwick, Division of Health Sciences, Coventry, United Kingdom.<sup>f</sup> Karolinska Institute, Department of Learning, Informatics, Management and Ethics, Stockholm, Sweden.**1. Ahmed Alatawi\***, MSc, Pharm.D. (**Corresponding author**)

PhD Candidate - Health Economist

Health Economics Group, Department of Clinical Sciences, Room 1966-215, Liverpool School of Tropical Medicine, LSTM, Pembroke Place, Liverpool, L3 5QA, United Kingdom.

Mobile: +4407491496786

Fax: +44(0)151 705 3370

Email: [Ahmed.alatawi@lstmed.ac.uk](mailto:Ahmed.alatawi@lstmed.ac.uk)**2. Gregory Koronakos, PhD**

Postdoctoral in Operational Research

University of Piraeus, Department of Informatics.

Karaoli & Dimitriou 80, 185 34, Piraeus, Greece. Email: [gkoron@unipi.gr](mailto:gkoron@unipi.gr)**3. Louis Niessen, Professor**

Chair of Health Economics.

Health Economics Group, Department of Clinical Sciences, Room 1966-206, Liverpool School of Tropical Medicine, LSTM, Pembroke Place, Liverpool, L3 5QA, United Kingdom.

Tel: +44 (0)151 705 3779. Email: [louis.niessen@lstmed.ac.uk](mailto:louis.niessen@lstmed.ac.uk)**4. Jahangir A. M. Khan, PhD**

Senior Lecturer in Health Economics

Health Economics Group, Department of International Public Health, Room 1966-215, Liverpool School of Tropical Medicine, LSTM, Pembroke Place, Liverpool, L3 5QA, United Kingdom.

Tel: +44 (0)151 702 9345. Email: [jahangir.khan@lstmed.ac.uk](mailto:jahangir.khan@lstmed.ac.uk)



1  
2  
3  
4  
5 **Word count:** 5,694

6 **Keywords:** Technical efficiency, Data envelopment analysis, Saudi Arabia, Public hospitals,  
7 General hospitals efficiency.  
8  
9

## 10 Abstract

11 **Objective:** In this study we assess the performance of public hospitals in Saudi Arabia. We  
12 detect the sources of inefficiency as well as to provide the optimal levels of the resources that  
13 provide the current level of health services. We enrich our analysis by employing locations  
14 and capacities of the hospitals.  
15  
16  
17  
18

19 **Design:** We employ Data Envelopment Analysis (DEA) to measure the technical efficiency of  
20 91 public hospitals. We apply BCC model under variable returns-to-scale (VRS) and input-  
21 orientation. The assessment includes four inputs, and six output variables taken from ministry  
22 of health databases for 2017. We conducted the performance assessment via the PIM-DEA  
23 3.2 software.  
24  
25  
26  
27  
28

29 **Setting:** Ministry of health-affiliated hospitals in the Kingdom of Saudi Arabia (KSA).  
30  
31

32 **Results:** Findings identified 75.8% (69 of 91) of public hospitals as technically inefficient. The  
33 average efficiency-score was 0.76, indicating that hospitals could have reduced their inputs  
34 by 24% without reduction in health-service provision. Small hospitals, (efficiency-score 0.79),  
35 were more efficient than medium-sized and large hospitals. Hospitals in the central-region  
36 were more efficient (efficiency-score 0.83), than those located in other geographic-locations.  
37 More than half of all hospitals (62.6%) were operating sub-optimally in terms of the scale-  
38 efficiency, implying that to improve efficiency, they need to alter their production capacity.  
39 Performance analysis identified overuse of physician's numbers and shortage of health-  
40 services production, as major causes of inefficiency.  
41  
42  
43  
44  
45  
46  
47  
48  
49

50 **Conclusion:** Most hospitals in this study were technically inefficient and operating at sub-  
51 optimal scale size and indicate that many hospitals may improve their performance through  
52 efficient utilization of health resources to provide the current level of health services. Changes  
53 in the production capacity are required, to facilitate optimal use of medical capacity. The  
54 inefficient hospitals could benefit from these findings to benchmarking their system and  
55 performance in light of the efficient hospital within their capacity and geographic location.  
56  
57  
58  
59  
60

### Strengths and limitations of this study:

- The study challenged to find data on economic values, severity of cases and quality of services. We expanded the selection of the variables to cover a broad range of health services and resources in the hospitals.
- The hospital mortality rate was included in output variables as a proxy of the service quality in the studied hospitals.
- We did not apply output-oriented DEA models, alternatively, we adopted input-orientation. Because we aimed to estimate the optimum levels of the resources without deteriorating the health services.
- Further estimation of the optimal levels of resources is required, to examine the allocation of these resources among the hospitals.
- This is the first performance assessment of public hospitals in Saudi Arabia that uses real data obtained directly from official databases of the Ministry of Health.

### Introduction

Increasing demand for healthcare and the expenditure required to provide efficient, equitable and effective healthcare systems, are global concerns. The Kingdom of Saudi Arabia (KSA) has experienced these recently, alongside substantial population growth, increased life expectancy and the proliferation of lifestyle-related disease. These have increased the demand for health services at a time of scant resource.<sup>1,2,3</sup>

Under article 31 of the national constitution, the KSA government guarantees free medical care to all citizens.<sup>4</sup> The government finances the public sector annually, largely from revenue derived from oil and gas production.<sup>5</sup> Table 1 shows the proportion of national budget allocated to the KSA's ministry of health (MOH).<sup>6</sup> Thus, the available resources should be utilized optimally.

The MOH is the primary provider of healthcare services in KSA, administering 60% of all provision.<sup>7</sup> It is the dominant provider of health services in the public sector.<sup>7,8</sup> Other government agencies, including the ministry of defence, the national guard and universities, share the remaining of healthcare provision, as does the private sector.<sup>5</sup> The MOH delivers primary, secondary and tertiary healthcare through 2,361 primary healthcare centres and 282 hospitals, administering 43,080 beds throughout the country.<sup>6</sup> Other MOH functions include

strategic planning, formulation of health policy, supervision of all health service delivery programs and the monitoring and management of all other health-related activities.<sup>7</sup> Public (MOH-affiliated) hospitals in KSA can be broadly classified into two groups, general hospitals with different capacities (number of beds) and specialised hospitals. General hospitals provide a wide range of health services, while specialised hospitals deliver health services for a specific health condition or to a particular group of beneficiaries. General hospitals in KSA are located in various geographic locations and serve populations of different demographic characteristics and needs, which may affect the hospital performance, as observed in other studies<sup>4,9</sup>.

**Table 1:** Budget appropriations for the MOH with respect to government budget (SR = Saudi Riyal)

| Year | Government Budget Billion SR | MOH Budget Billion SR | Percentage of MOH to the government budget | No. of Hospitals | No. of Beds |
|------|------------------------------|-----------------------|--------------------------------------------|------------------|-------------|
| 2013 | 820                          | 54.3                  | 6.63%                                      | 268              | 38970       |
| 2014 | 855                          | 59.9                  | 7.02%                                      | 270              | 40300       |
| 2015 | 860                          | 62.3                  | 7.25%                                      | 274              | 41297       |
| 2016 | 840                          | 58.9                  | 7.01%                                      | 274              | 41835       |
| 2017 | 890                          | 67.7                  | 7.61%                                      | 282              | 43080       |

Source; Ministry of Health; Statistical yearbook, 2017.

During 2015, KSA government spending on health was 71.3% of the country's total health expenditure, which corresponds to 4.1% of GDP for that year.<sup>10</sup> Healthcare expenditure in KSA increased by 24.7% between 2013 and 2017.<sup>1,2,6</sup> While public spending on health in KSA is remarkably high in comparison to many high-income countries (71.3% for KSA versus 61.2% for high-income countries), the number of hospital beds is considerably lower.<sup>3,10</sup> Just 2.7 hospital beds per 1,000 people are allocated in KSA, whereas the average corresponding figure in other high-income countries is 8.9.<sup>3,10</sup> A previous study suggested that demand for healthcare services in KSA would increase by 145% by 2025 and require twice the number of hospital beds.<sup>11</sup>

Although much has been done to promote the efficient use of resources, this has proven insufficient to meet the rising health expenditure and demand for healthcare in KSA.<sup>12</sup> Providers seem to find it very challenging to deliver adequate provision using current resources.<sup>4</sup> There seems to be an imbalance between health service availability and health spending, so better use of resources is necessary if KSA is to have an efficient and appropriate health system.<sup>12</sup>

1  
2  
3 Governments worldwide conduct performance assessment of their health sectors, to ensure  
4 that public funds are effectively utilized.<sup>13</sup> Efficiency evaluation is carried out under different  
5 concepts, such as technical, allocative, cost and overall efficiency.<sup>13</sup> However, the most  
6 performance studies are devoted to measuring the technical efficiency. Of these, the  
7 technical efficiency approach is most commonly used. This is based on Farrell's theory of  
8 1957, which introduced a measure of technical efficiency based on comparison of the inputs and  
9 outputs of set entities, called decision making units (DMUs).<sup>14</sup>

10  
11  
12  
13  
14  
15  
16  
17  
18  
19  
20  
21  
22  
23  
24  
25  
26  
27  
28  
29  
30  
31  
32  
33  
34  
35  
36  
37  
38  
39  
40  
41  
42  
43  
44  
45  
46  
47  
48  
49  
50  
51  
52  
53  
54  
55  
56  
57  
58  
59  
60  
Hospital efficiency is crucial to the efficiency of the health system generally, as hospitals are  
key consumers of health resources.<sup>15,16</sup> Hanson et al. (2002) found that public hospitals  
consume around 40% of the total state health budget in many sub-Saharan African  
countries.<sup>15</sup> Public hospitals used almost 44% of national health spending in the United  
Kingdom in 2012/13.<sup>17</sup>

In general, there is a scarcity of studies and empirical works on the performance assessment  
of public hospitals, and that rarity is particularly acute in the context of KSA.<sup>18</sup> Systematic  
review of public hospital efficiency studies in the Gulf region and similar countries has shown  
the number of studies to be limited, as efficiency analysis is a novel approach to research in  
the Gulf, including KSA.<sup>18</sup> The review found only two studies based in KSA context; a study by  
Helal and Elimam in 2017<sup>19</sup>, which assessed the efficiency of health services at districts level  
in KSA using MOH data from 2014. Another efficiency analysis conducted in 2013 of 20 public  
hospitals, under private sector management in KSA, which found that 60% of the study  
sample had not achieved the efficient score.<sup>20</sup>

Hospital efficiency has hitherto been measured mainly by frontier analysis methods, either  
through non-parametric data envelopment analysis (DEA) or as parametric stochastic frontier  
analysis (SFA).<sup>13</sup> These methods compare hospital performance with an estimated efficient  
frontier comprising the best-performing hospitals.<sup>21,22</sup>

Data envelopment analysis has for many years been the most commonly-used technique for  
measuring the relative efficiency in healthcare.<sup>16,23</sup> Systematic reviews of efficiency studies  
have often found that DEA to be the predominant method of public hospital efficiency  
assessments among studies reviewed.<sup>16,18,23</sup> Hollingworth et al. (2003, 2008) conducted  
systematic reviews of efficiency analysis internationally and noticed that DEA was used in

1  
2  
3 around the half of studies, a further fifth used DEA in with some form of secondary  
4 regressions.<sup>16,23</sup> Another review<sup>22</sup>, of efficiency in Iranian hospitals, found DEA was applied  
5 in all reviewed studies; three of those studies also used SFA to estimate efficiency scores. A  
6 systematic review of health system efficiency studies in OECD countries<sup>24</sup> found DEA applied  
7 in 64% of studies.  
8  
9  
10  
11  
12

13 In this study we conduct a performance assessment of the MOH-administered general  
14 hospitals in KSA. We measure the technical efficiency of public hospitals and identify the  
15 sources of inefficiency and estimate the optimal levels of the resources. We also provide  
16 subscriptions for improvements so as the inefficient hospitals to be rendered efficient. At a  
17 post optimality phase, we enrich our analysis by employing information about the  
18 geographical location and the capacity (number of beds) of the hospitals. Thus, this  
19 performance assessment provides useful information to the decision-makers, which can be  
20 employed for policy reforms, to optimise the use of health resources in public hospitals and  
21 consequently improve the efficiency of healthcare systems.  
22  
23  
24  
25  
26  
27  
28  
29  
30

## 31 Methods

### 32 Population and selection of sample

33 As the application of DEA is based on a homogenous (comparative) sample that use similar  
34 inputs to produce similar outputs, we focused on examining the technical efficiency for  
35 general hospitals.<sup>13</sup>  
36  
37  
38  
39  
40

41 Hollingsworth (2008) and Varabyova (2016) argued that sample hospitals should be of same  
42 type and provide the same services and health activities.<sup>23,24</sup> Since the inclusion of divergent  
43 specialist units in the same sample will confound the results — frontier techniques are  
44 susceptible to outliers.<sup>23,24</sup> Specialised hospitals often lack types of secondary service, e.g.  
45 surgical operations rarely occur in psychiatric hospitals, and such hospitals, if included, will  
46 appear as inefficient while surgery is a considered as one of the outputs.<sup>22,23,25</sup> Specialised  
47 hospitals were therefore excluded from this analysis. Similarly, small hospitals (with 50 beds  
48 or fewer) provide primary care services while lacking secondary and tertiary health services,  
49 and consequently miss a significant number of output variables (e.g. inpatient services,  
50 patient discharge, surgical operations, laboratory testing) compared to bigger hospitals. In  
51  
52  
53  
54  
55  
56  
57  
58  
59  
60

1  
2  
3 this study we excluded also the smaller hospitals, to ensure greater homogeneity in  
4 performance evaluation across the units.<sup>13,26</sup>  
5  
6

7 Ultimately, the homogenous sample used in the analysis included 21,528 out of 398,68 (54%)  
8 of the total active hospital beds provided by the MOH in KSA. We included in the assessment  
9 97 general hospitals and removed six of them, due to missing data. The data of hospital inputs  
10 and outputs for 2017 was collected by the lead author from official statistical, informational  
11 and research databases of Administration of Statistics and Information and Administration of  
12 Research and Studies, which affiliated of the MOH, following approval from the designated  
13 authority. Data collection took place from May to July 2018.  
14  
15  
16  
17  
18  
19

20  
21 The sample hospitals are in 64 cities, affiliated to 20 administrative districts, located in five  
22 geographic regions, namely central, west, east, south and north regions. The general hospitals  
23 in the sample are classified into four groups based on their capacity (number of beds): small  
24 (fewer than 200 beds), lower-medium (200 to 299 beds), upper-medium (300 to 499 beds)  
25 and large (500 or more beds) hospitals, following Gok's<sup>27</sup> categorization. However, these  
26 hospitals are affiliated, organized and funded by the MOH, and have not autonomy in term  
27 of funding or organising structure by themselves or other agents. Thus, we applied the DEA  
28 model for all 91 hospitals. Then, we presented the efficiency scores in each capacity and each  
29 geographic location. Figure 1 illustrates number of hospitals and hospital-beds in each  
30 category of capacity and location.  
31  
32  
33  
34  
35  
36  
37  
38  
39  
40  
41  
42  
43  
44  
45  
46  
47

48  
49  
50  
51  
52  
53  
54  
55  
56  
57  
58  
59  
60  
Figure 1 to be inserted here

### Inputs and outputs

Selection of input and output variables is a crucial step in performance measurement, because the results of any efficiency assessment depend significantly on the variables used in the estimation models.<sup>28</sup> The literature has focused on labour (e.g. health professionals) and capital (e.g. number of beds), as input variables, while some studies included consumable resources.<sup>13,28</sup> The main categories of output used in healthcare-related efficiency studies

1  
2  
3 were healthcare activities (e.g. number of outpatient visits, inpatient services, number of  
4 surgeries) and health outcomes (e.g. mortality rate).<sup>13, 22,24</sup>  
5  
6

7 In our study we selected the hospital outputs that dependent on the selected inputs, which  
8 cover a broad range of health services provided and health resources used by public hospitals  
9 in KSA. In particular, four inputs and six outputs were chosen based on the availability of the  
10 data in KSA context, which were rationally approved in previous theoretical and empirical  
11 studies<sup>13,16,23</sup>.  
12  
13  
14  
15  
16

17 The input variables chosen are: (1) number of hospital beds; (2) number of full-time  
18 physicians; (3) number of full-time nurses and (4) number of full-time allied health personnel  
19 (i.e. pharmacists, midwives, medical technicians, medical radiologists, physiotherapists)  
20 employed in the hospital. The output variables used in this study are: (1) outpatient visits  
21 (number of patients receiving outpatient treatment within a year); (2) discharged patients  
22 (number of patients receiving inpatient treatment within a year); (3) total number of surgical  
23 operations during the year; (4) number of radiological investigations conducted in hospital  
24 during the year; (5) number of laboratory tests during the year; (6) hospital mortality rate  
25 (ratio of inpatient deaths during hospitalization to the total number of inpatients that year).  
26 The last output variable is an indicator of health service quality and health outcomes in  
27 hospital, as argued by Sahin and Ozcan<sup>29</sup>. Reduction in the mortality rate and increase  
28 quantity of life signify an improvement in the health outcomes of the public hospital of  
29 investigation. Therefore, mortality rate could be a proxy for a weighted health quality  
30 measure in this analysis<sup>30</sup>. The inverse value for the mortality rate (one divided by mortality  
31 rate) is included as an output value in the assessment, meaning that hospitals with higher  
32 mortality rate would have a smaller ratio as output values.<sup>29</sup> As the model assumes that  
33 output and input variables are isotonic, (i.e., increased input reduces efficiency as well as  
34 increased output increases efficiency). We had to apply this correction, otherwise, a higher  
35 mortality rate would incorrectly contribute to a better hospital outcome<sup>30</sup>.  
36  
37  
38  
39  
40  
41  
42  
43  
44  
45  
46  
47  
48  
49  
50  
51

52 The number of hospitals (DMUs in DEA context) should be at least two times larger than the  
53 sum of inputs and outputs.<sup>31</sup> However, Hollingsworth (2014)<sup>32</sup> suggested that the number of  
54 units used in efficiency assessment should be at least three times the sum of inputs and  
55 outputs. In accordance to the above-mentioned rule of thumb, in this study we include 91  
56 hospitals, more than three times the combined number of input and output variables.  
57  
58  
59  
60

## Patient and Public Involvement

No patients were involved in this study, and we used anonymous data from MOH databases.

## Data Envelopment Analysis

Data Envelopment Analysis (DEA) is a powerful technique that is based on linear programming. It was developed for measuring the performance of a set of comparable entities, called Decision Making Units (DMUs), which convert multiple inputs into multiple outputs<sup>26,32</sup>. In this method each hospital is compared against the estimated efficient frontier comprising the best-performing hospitals.<sup>21,22</sup>

DEA has been already the most commonly-used technique for measuring the relative efficiency in healthcare.<sup>16,23</sup> In systematic reviews we can observe that DEA is the predominant method of public hospital efficiency assessment.<sup>16,18,23</sup> DEA is widely applicable since does not require any a priori specification of the underlying functional form that relates the inputs with the outputs.<sup>13</sup> In addition, use of DEA is justified by its ability to incorporate multiple inputs and outputs in different units of assessment.<sup>13,32</sup>

Several DEA models have been developed to analyze the efficiency based on Farrell's concept<sup>14</sup>. The most well known and basis for the rest DEA models is the CCR model developed by Charnes, Cooper and Rhodes<sup>33</sup>, which assumes that production has constant returns to scale (CRS) and the BCC model developed by Banker, Charnes and Cooper<sup>34</sup>, under the assumption of variable returns to scale (VRS).<sup>13,16</sup> The choice of CCR or BCC model depends on the context of the problem under examination i.e. the technology linking the inputs to outputs in the transformation process.<sup>13</sup>

Generally, the CCR model — whereby the efficiency frontier has a constant slope (CRS), which means that any change in the inputs results to a proportional change in the outputs<sup>26</sup>. Constant returns to scale CRS may be adopted when machines are involved in the process, which roughly means that the production can be doubled by doubling the levels of inputs. However, when employees (human factor) participate in the production process, then it is naive to expect that they could work at a constant rate. The CCR efficiency assessment by the may be affected if the DMUs are not operating on the optimal scale, since CRS does not distinguish between the scale and pure (managerial) technical efficiency.<sup>35</sup> If the efficiency analysis considers a managerial perspective, a BCC technology assumption will be appropriate



1  
2  
3 to understand if a scale of operations or provider's practice affects productivity.<sup>27,36</sup> Scale  
4 efficiency is defined as a ratio of CRS to VRS efficiency scores and provides evidence whether  
5 the DMU is operating on the optimal scale size.<sup>16,24</sup> Furthermore, the efficiencies of DMUs can  
6 be comprehensively analysed using both CCR and BCC assumption for more realistic changes  
7 in production process, and implications in the real world.<sup>13,26</sup> Other systematic reviews<sup>24,25</sup>  
8 have reported similar findings where studies used both CCR and BCC assumptions in efficiency  
9 measurements.

10  
11 Rationally, the commonly-used orientations in DEA analysis are input orientation (i.e.  
12 minimization of inputs with the given amount of outputs) and output orientation (i.e. inputs  
13 are held constant and outputs are proportionally increased).<sup>26</sup> Previous empirical studies<sup>35</sup>  
14 have argued that hospitals have relatively little control over their outputs (for example,  
15 expanding surgical operations), but more control over the inputs (e.g. medical devices), where  
16 they have the social responsibility to provide medical treatment through the public hospitals  
17 in general. Thus, most studies adopt input orientation for efficiency assessment of the  
18 hospitals.<sup>24,25,37</sup> In a few studies output orientation is adopted in response to the strategic  
19 health plans of the countries aiming to expand healthcare provision during a specific  
20 period.<sup>38,39</sup> However, in our study we aim to estimate the optimal levels of the resources  
21 without deteriorating the levels of the health services that the hospitals provide. In this way,  
22 we provide the central authorities with the potential savings that could be made in the health  
23 sector.

24  
25 The efficiency of a hospital is defined as the ratio of the weighted sum of outputs (total virtual  
26 output) to the weighted sum of inputs (total virtual input), with the weights being obtained  
27 in favour of each evaluated unit by the optimization process. The basic BCC model that  
28 provides the BCC efficiency for the hospital  $j_0$  is given below:

$$\begin{aligned}
 & \max e_{j_0} = \frac{\omega Y_{j_0} - \omega_o}{\eta X_{j_0}} \\
 & \text{s.t.} \\
 & \frac{\omega Y_j - \omega_o}{\eta X_j} \leq 1, \quad j = 1, \dots, n \\
 & \eta \geq 0, \omega \geq 0
 \end{aligned}
 \tag{1}$$

Assume  $n$  DMUs, each using  $m$  inputs to produce  $s$  outputs. We denote by  $y_{rj}$  the level of the output  $r(r=1, \dots, s)$  produced by unit  $j$  ( $j=1, \dots, n$ ) and  $x_{ij}$  the level of the input  $i$  ( $i=1, \dots, m$ ) used by unit  $j$ . The vector of inputs for DMU  $j$  is  $X_j = (x_{1j}, \dots, x_{mj})^T$  and the vector of outputs is  $Y_j = (y_{1j}, \dots, y_{sj})^T$ . The model (1) is formulated and solved for each hospital in order to obtain its efficiency score. The variables  $\eta = (\eta_1, \dots, \eta_m)$  and  $\omega = (\omega_1, \dots, \omega_s)$  are the weights associated with the inputs and the outputs respectively. These weights are calculated in a manner that they provide the highest possible efficiency score for the evaluated hospital  $j_0$ .

The BCC model (1) can be transformed to a linear program by applying the Charnes and Cooper (1962) transformation (C-C transformation hereafter)<sup>40</sup>. The transformation is carried out by considering a scalar  $t \in \mathfrak{R}^+$  such as  $t\eta X_{j_0} = 1$  and multiplying all terms of model (1) with  $t > 0$  so that  $v = t\eta$ ,  $u = t\omega$ ,  $u_0 = t\omega_0$ . The linear equivalent of model (1) is expressed as:

$$\begin{aligned}
 & \max uY_{j_0} - u_0 \\
 & \text{s.t.} \\
 & vX_{j_0} = 1 \\
 & uY_j - u_0 - vX_j \leq 0, \quad j = 1, \dots, n \\
 & v \geq 0, u \geq 0
 \end{aligned} \tag{2}$$

Once an optimal solution  $v^*$ ,  $u^*$ ,  $u_0^*$  of model (2) is derived, the input oriented CCR-efficiency  $e_{j_0}^*$  for the hospital  $j_0$  under evaluation is obtained directly from the objective function.

The prevailing returns to scale can be identified by the optimal solution of both multiplier and envelopment BCC models. Banker et al (1984) determined the returns to scale (RTS) using the optimal value of the free variable in the multiplier models<sup>34</sup>. Given the point  $(x_0, y_0)$  that lies on the efficient frontier, the returns to scale at this point are identified by the following three conditions:

1. Increasing returns to scale (IRS) prevail at  $(x_0, y_0)$  if and only if  $u_0^* < 0$  for all optimal solutions. Meaning the increase in all production factors (inputs) resulted in more production (outputs).

- 1  
2  
3  
4  
5  
6  
7  
8  
9  
10  
11  
12  
13
2. Decreasing returns to scale (DRS) prevail at  $(x_0, y_0)$  if and only if  $u_o^* > 0$  for all optimal solutions, meaning an equal increase in all production factors led to less production.
  3. Constant returns to scale (CRS) prevail at  $(x_0, y_0)$  if and only if  $u_o^* = 0$  in any optimal solutions, where equal increase in all production factors led to the same amount of increase in production.

14 Improvement management software (PIM-DEA version 3.2) was used for DEA analysis.<sup>41</sup>

## 17 Results

18 Descriptive statistics, concerning the inputs and outputs of 91 general hospitals during 2017,  
19 are presented in Table 2. The average hospital size is 236.57 beds, with a range of 100 to 711  
20 beds. Full-time physicians ranged from 38 to 894, with a mean of 212. The number of nurses  
21 is on average 495 but ranged from 74 to 1,930. Full-time allied health personnel ranged from  
22 37 to 1,149, with an average of 280.

23  
24  
25  
26  
27  
28  
29 **Table 2:** Descriptive statistics of the inputs and outputs of the 91 hospitals

30  
31  
32  
33  
34  
35  
36  
37  
38  
39  
40  
41  
42  
43  
44  
45  
46  
47  
48

|                          | Mean      | Standard Deviation | Min    | Max       |
|--------------------------|-----------|--------------------|--------|-----------|
| <b>Inputs</b>            |           |                    |        |           |
| Hospital beds            | 236.6     | 137.6              | 100    | 711       |
| Physicians               | 212.3     | 168.7              | 38     | 894       |
| Nurses                   | 495.2     | 403.6              | 74     | 1,930     |
| Allied Health Personnel  | 280.1     | 219.1              | 37     | 1,149     |
| <b>Outputs</b>           |           |                    |        |           |
| Outpatient visits        | 72,986.5  | 72,475.3           | 1,785  | 466,608   |
| Discharged patients      | 26,016.4  | 55,856.4           | 19     | 503,216   |
| Surgical operations      | 2,638.4   | 2,151.2            | 172    | 9,464     |
| Laboratory tests         | 965,840.8 | 1,095,415.6        | 794    | 5,512,774 |
| Radiology Investigations | 53,531.4  | 46,788.7           | 107    | 221,980   |
| Hospital mortality rate  | 0.0224    | 0.0212             | 0.0003 | 0.125     |

49  
50  
51  
52  
53  
54  
55  
56  
57  
58  
59  
60

Concerning the outputs, the average number of patient visits to outpatient departments is 72,986 and ranged from 1,785 to 466,608 visits. Discharged patients receiving inpatient services during 2017 averaged 26,016, ranging from 19 to 503,216. Surgical operations ranged from 172 to 9,464 with a mean of 2,638 surgeries per hospital. Means for laboratory and radiology tests are 965840 and 53531 respectively, during 2017. Average mortality rate is 2.24%.

Table 3 presents the results of DEA models, summary statistics of average technical (CRS and VRS) efficiency, and scale (SE) efficiency scores, as well as concerning the return to scale

**Table 3:** Technical efficiency scores and returns to the scale of the public hospitals in KSA

|                                                     | <b>CRS technical efficiency</b> | <b>VRS technical efficiency</b> | <b>Scale efficiency</b> | <b>CRS [N (%)]</b> | <b>IRS [N (%)]</b> | <b>DRS [N (%)]</b> |
|-----------------------------------------------------|---------------------------------|---------------------------------|-------------------------|--------------------|--------------------|--------------------|
| <b>All hospitals (n=91)</b>                         |                                 |                                 |                         |                    |                    |                    |
| Mean                                                | 0.76                            | 0.87                            | 0.87                    | 34 (37.4)          | 40 (44)            | 17 (18.6)          |
| Std. Dev.                                           | 0.23                            | 0.18                            | 0.18                    |                    |                    |                    |
| Min                                                 | 0.11                            | 0.30                            | 0.19                    |                    |                    |                    |
| No. full score                                      | 22 (24.2%)                      | 47                              | 25                      |                    |                    |                    |
| <b>Large hospitals: &gt;=500 beds (n= 8)</b>        |                                 |                                 |                         |                    |                    |                    |
| Mean                                                | 0.65                            | 0.75                            | 0.87                    | 2 (25)             | 1 (12.5)           | 5 (62.5)           |
| Std. Dev.                                           | 0.27                            | 0.30                            | 0.13                    |                    |                    |                    |
| Min                                                 | 0.28                            | 0.30                            | 0.59                    |                    |                    |                    |
| No. full score                                      | 1 (12.5)                        | 4                               | 1                       |                    |                    |                    |
| <b>Upper-medium hospitals: 300-499 beds (n= 22)</b> |                                 |                                 |                         |                    |                    |                    |
| Mean                                                | 0.76                            | 0.80                            | 0.94                    | 7 (31.8)           | 5 (22.7)           | 10 (45.5)          |
| Std. Dev.                                           | 0.19                            | 0.19                            | 0.07                    |                    |                    |                    |
| Min                                                 | 0.39                            | 0.41                            | 0.76                    |                    |                    |                    |
| No. full score                                      | 3 (13.6)                        | 7                               | 3                       |                    |                    |                    |
| <b>Lower-medium hospitals: 200-299 beds (n= 22)</b> |                                 |                                 |                         |                    |                    |                    |
| Mean                                                | 0.73                            | 0.79                            | 0.90                    | 10 (45.5)          | 10 (45.5)          | 2 (9.1)            |
| Std. Dev.                                           | 0.25                            | 0.19                            | 0.18                    |                    |                    |                    |
| Min                                                 | 0.11                            | 0.50                            | 0.22                    |                    |                    |                    |
| No. full score                                      | 4 (18.2)                        | 4                               | 4                       |                    |                    |                    |
| <b>Small hospitals: &lt;200 beds (n= 39)</b>        |                                 |                                 |                         |                    |                    |                    |
| Mean                                                | 0.79                            | 0.96                            | 0.82                    | 15 (38.5)          | 24 (61.5)          | 0 (0)              |
| Std. Dev.                                           | 0.23                            | 0.09                            | 0.22                    |                    |                    |                    |
| Min                                                 | 0.19                            | 0.67                            | 0.19                    |                    |                    |                    |
| No. full score                                      | 13 (33.3)                       | 31                              | 13                      |                    |                    |                    |

The average CRS technical efficiency score for MOH general hospitals is 0.76, with a standard deviation (SD) of 0.23, which indicates that these hospitals could reduce use of all their inputs on average by 24% without any reduction in the number of services provided. Also, the VRS technical score on average is 0.87 (SD 0.18). The distribution of technical, pure technical and scale efficiency scores is given in Figure 2.

Figure 2 to be inserted here

The lowest technical efficiency score reported is 0.11, but 22 hospitals out of 91 (24.2%) are both technically and scale efficient, which indicates that these hospitals utilize optimally their inputs. Among the inefficient hospitals 55 hospitals (60.4%) achieved efficiency scores of at least 0.50 efficiency level (Figure 2) and 14 hospitals (15.4%) reported efficiency scores below 0.50. Average scale efficiency scores are 0.87, with (SD 0.18). Although 47 hospitals (52%) reported an efficient score on VRS (pure efficiency), only 25 (27%) hospitals are efficient on the scale.

Concerning the returns to scale, we have found that 34 hospitals (37.4%) operate under constant returns to scale (CRS); while 40 hospitals (44%) operate under increasing returns to scale (IRS), and 17 hospitals (18.6%) decreasing returns to scale. However, hospitals that were operating on either IRS or DRS needed to alter their capacity to operate on the optimal scale size i.e., at the constant return to the scale, which would be required to achieve technical efficiency.

We present in table 3 the efficiency scores of the 91 hospitals for each capacity (size category). From the capacity perspective, small hospitals had higher levels of technical (CRS and VRS) efficiencies than medium-sized (both lower- and upper-medium) and large hospitals. Table 3 shows that small hospitals have on average technical efficiency of 0.79 (SD 0.23); one-third of hospitals in this category are technically and the scale efficient. Average technical efficiency of lower-medium hospitals is 0.73 (SD 0.25), with a higher percentage of inefficient hospitals (81.8%), than for small hospitals. Although upper-medium-sized hospitals reported a slightly higher average technical efficiency score of 0.76 (SD 0.19), fewer hospitals in this category reported an efficient score, meaning a higher percentage of inefficiencies (86.4%). Large hospitals were the least efficient when compared to other categories. The average technical efficiency of large hospitals was 0.65 (SD 0.27), only one was technically efficient.

Regarding scale-efficiency scores, upper-medium (0.94) and lower-medium (0.90) sized hospitals operate at a more optimal scale than small (0.82) or large hospitals (0.87). Also, 45.5% of lower-medium hospitals operate on the CRS, followed by small hospitals (38.5%). However, most of the remaining hospitals in these categories, i.e. lower-medium (45.5%) and

small size (61.5%) hospitals are operating on IRS. In contrast, most large hospitals (62.5%) showed DRS, and two of them were on CRS, indicating a need to downsize these hospitals to improve technical efficiency. Similarly, 45.5% of upper-medium-sized hospitals operate on DRS and one-third of this category are operating (CRS).

Table 4 shows the average efficiency scores in five geographical regions, however, based on the analysis of all 91 hospitals together. Hospitals in the central region reported the highest average technical efficiency score of 0.83 (SD 0.18), followed by eastern hospitals with an average score of 0.80 (SD 0.28). Hospitals in western KSA reported the least average score, 0.68 (SD 0.20).

**Table 4** Technical efficiency scores and returns to the scale of the hospitals categorized by location

|                                         | CRS technical efficiency | VRS technical efficiency | Scale efficiency | CRS [N (%)] | IRS [N (%)] | DRS [N (%)] |
|-----------------------------------------|--------------------------|--------------------------|------------------|-------------|-------------|-------------|
| <b>South region hospitals (n= 22)</b>   |                          |                          |                  |             |             |             |
| Mean                                    | 0.75                     | 0.89                     | 0.83             | 9 (40.9)    | 9 (40.9)    | 4 (18.2)    |
| Std. Dev.                               | 0.25                     | 0.18                     | 0.23             |             |             |             |
| Min                                     | 0.11                     | 0.41                     | 0.22             |             |             |             |
| No. full score                          | 4 (18.2)                 | 13                       | 4                |             |             |             |
| <b>East region hospitals (n =8)</b>     |                          |                          |                  |             |             |             |
| Mean                                    | 0.80                     | 0.85                     | 0.90             | 4 (50)      | 1 (12.5)    | 3 (37.5)    |
| Std. Dev.                               | 0.28                     | 0.21                     | 0.16             |             |             |             |
| Min                                     | 0.27                     | 0.50                     | 0.54             |             |             |             |
| No. full score                          | 1 (12.5)                 | 4                        | 1                |             |             |             |
| <b>North region hospitals (n =17)</b>   |                          |                          |                  |             |             |             |
| Mean                                    | 0.75                     | 0.84                     | 0.90             | 7 (41.2)    | 9 (52.9)    | 1 (5.9)     |
| Std. Dev.                               | 0.28                     | 0.23                     | 0.20             |             |             |             |
| Min                                     | 0.19                     | 0.30                     | 0.19             |             |             |             |
| No. full score                          | 6 (35.3)                 | 9                        | 6                |             |             |             |
| <b>Central region hospitals (n =24)</b> |                          |                          |                  |             |             |             |
| Mean                                    | 0.83                     | 0.89                     | 0.93             | 10 (41.7)   | 11 (45.8)   | 3 (12.5)    |
| Std. Dev.                               | 0.18                     | 0.16                     | 0.10             |             |             |             |
| Min                                     | 0.49                     | 0.50                     | 0.69             |             |             |             |
| No. full score                          | 8 (33.3)                 | 12                       | 8                |             |             |             |
| <b>West region hospitals (n =20)</b>    |                          |                          |                  |             |             |             |
| Mean                                    | 0.68                     | 0.85                     | 0.81             | 4 (20)      | 10 (50)     | 6 (30)      |
| Std. Dev.                               | 0.20                     | 0.17                     | 0.17             |             |             |             |
| Min                                     | 0.37                     | 0.42                     | 0.46             |             |             |             |
| No. full score                          | 3 (15)                   | 9                        | 3                |             |             |             |

The percentage of efficient hospitals in the north (35.3%) and the central (33.3%) regions are higher than the other regions. The eastern, western and southern regions have a higher percentage of inefficient hospitals. Both central and southern regions reported relatively higher VRS efficiency score of 0.89. In terms of average scale efficiency scores, central region hospitals (0.93), and hospitals in the north- and east (both 0.90) were operating at more optimal scale than those in the west (0.81) and south (0.83). Half of the sample hospitals in the east region operate on CRS, followed by hospitals in the central and north regions (both 41%). The findings also revealed that 52.9 % of north region hospitals were operating on IRS, while 37.5% of east region hospitals were operating on DRS.

The performance analysis identified the slacks, which showed either excess input utilization or shortages of output production. Table 5 shows the average amount of slack in hospitals deemed inefficient. These results represent the combined scores of slack for all inefficient hospitals, for each input and output. Table 5 also shows the percentage of change (slacks) in the number of inputs or outputs required to eliminate the inefficiencies and achieve target levels.

**Table 5** Slacks evaluation for inefficient hospitals

| <b>Input slacks</b>      | Mean (SD)          | Percentage of change |
|--------------------------|--------------------|----------------------|
| Hospital beds            | 48.4 (76.6)        | -20.4%               |
| Physicians               | 47.5 (72.6)        | -22.4%               |
| Nurses                   | 102.9 (173.1)      | -20.8%               |
| Allied Health Personnel  | 58.38 (98.3)       | -20.84%              |
| <b>Output slacks</b>     |                    |                      |
| Outpatient visits        | 8866.1 (23712)     | 12.2%                |
| Discharged patients      | 3700.6 (8214.2)    | 14.2%                |
| Surgical operations      | 282.6 (730.9)      | 10.7%                |
| Laboratory tests         | 66105.6 (140332.4) | 6.8%                 |
| Radiology Investigations | 2204.6 (6944.1)    | 4.1%                 |
| Mortality rate           | 0.006 (0.014)      | 21.7%                |

In terms of input, results show that an excess of physicians was the main cause of inefficiencies in public hospitals. A feasible, achievable reduction in the number of physicians was on average 22.38 % of the current values (compared with the amounts given in Table 2). The next most substantial slack was observed in allied health personnel, at 20.84%. Surpluses of hospital beds and nurses were also important causes of inefficiency and should be reduced

1  
2  
3 on average by 20.44% and 20.77%, respectively. In addition to the input reduction, the  
4 average number of services should be increased to meet targets. Furthermore, the quality of  
5 health services in public hospitals would have improved with a decrease in the hospital  
6 mortality rate.  
7  
8  
9

## 10 11 Discussion

12  
13  
14 This study evaluated the technical efficiency of public hospitals affiliated to the KSA's MOH,  
15 using data envelopment analysis. Analysis showed 75% of sample hospitals could not utilize  
16 their intact resources to generate specified outputs. The average CRS technical efficiency  
17 score was 0.76, indicating that hospitals could produce their current level of outputs with 76%  
18 of inputs currently used, and thereby achieve efficiency. Efficiency scores ranged from 0.11  
19 to 1.00 (Figure 2), revealing considerable variations in efficiency scores among hospitals.  
20 Moreover, the average VRS technical efficiency and scale efficiency scores were both 0.87.  
21 This indicated that inefficiency was due to administrative failure to overcome external  
22 environmental factors, and inability to manage internal operations in the hospitals. Notably,  
23 Helal and Elimam<sup>19</sup> in 2017, assessed the efficiency of health services at districts level in KSA  
24 based on MOH data 2014, found an average efficiency score of 0.92, and 45% of the districts  
25 achieved the technical efficiency score. An efficiency analysis of 20 public hospitals, under  
26 private sector management in KSA, found that 60% of the study sample had not achieved the  
27 efficient score, with an average score of 0.84.<sup>20</sup>  
28  
29  
30  
31  
32  
33  
34  
35  
36  
37  
38  
39  
40

41 Results of the study presented here suggest that small hospitals were relatively more  
42 technically efficient than medium-sized and large hospitals (Table 2). Other efficiency studies  
43 have reported similar findings: Gok<sup>27</sup> found that small hospitals achieved higher efficiency  
44 scores than medium-sized and large ones. This might be due to the differing locations and  
45 missions of small and large hospitals.<sup>27,36</sup> In this study's sample, small hospitals were mainly  
46 in peripheral cities and towns in KSA, which lacked other sources of public or private  
47 healthcare. Service provision in those hospitals might be relatively high compared to the  
48 health resources used. Large hospitals (500 or more beds) tended to be in larger cities in urban  
49 areas, where many other health providers shared the healthcare of much of the urban  
50 population, which might generate a relatively decreased level of health services production  
51 in respect of inputs used.  
52  
53  
54  
55  
56  
57  
58  
59  
60



1  
2  
3 Regarding the different missions, large hospitals consumed a high amount of health resources  
4 to meet the various requirements of comprehensive care.<sup>27</sup> Since some of these were  
5 teaching hospitals, however, teaching activities were not counted in the outcome  
6 measurements.<sup>27,28</sup> In such large hospitals, treatment processes might be more complicated,  
7 and some of the productions of these hospitals could not be assessed in the hospital  
8 outcomes.<sup>42</sup>

9  
10  
11  
12  
13  
14  
15 This study found 57 hospitals (62.6%) operating on non-optimal scale size; 44% were  
16 operating on the IRS, while 18.6% showed DRS (Table 3). This indicated that the efficiency of  
17 healthcare in KSA might be improved through downsizing of hospitals on DRS and reallocating  
18 these inputs to the hospitals operating in the IRS. Moreover, five out of eight large hospitals  
19 (500 or more beds) were operating on DRS, implying that to improve efficiency, they needed  
20 to reduce their production capacity. This is supported by other research findings.<sup>43</sup>

21  
22  
23  
24  
25  
26  
27 This study found that 61.5% of small hospitals had been operating on IRS, none was on DRS.  
28 It can thus be argued, like Kiadaliri and colleagues (2011), that the increase of capacity (inputs)  
29 of this category should be increased by reallocating resources from the larger hospitals for  
30 improving efficiency <sup>43</sup>. The efficient scale of public hospitals was in medium-sized  
31 establishments (200 to 499 beds). Although half of the hospitals located in the east were  
32 operating on the most productive scale size (CRS), three were operating on DRS. Around 53%  
33 of the hospitals in the north were operating on IRS, whereas 30% of western region hospitals,  
34 which reported the lowest efficiency scores, were operating on DRS.

35  
36  
37  
38  
39  
40  
41  
42 Our analysis found that hospitals located in the west region were relatively less efficient than  
43 hospitals located in other regions. The central region hospitals appeared to be the efficient.  
44 Atilgan<sup>44</sup> reported in the same line as our findings, i.e. location-specific differences in  
45 efficiency scores for general MOH hospitals in Turkey. Atilgan argued that this could be due  
46 to case mix and/or case severity differences between hospitals. We can similarly argue that  
47 hospitals in the west region might be treating more severe cases than hospitals in other  
48 regions in KSA, which might have led to different levels of efficiency scores in hospitals across  
49 regions.<sup>22</sup> Another explanation could be that hospitals in this region consumed more inputs  
50 in anticipation of the annual pilgrimage season, for which government of KSA allocates more  
51 resources to such hospitals.

1  
2  
3  
4  
5  
6  
7  
8  
9  
10  
11  
12  
13  
14  
15  
16  
17  
18  
19  
20  
21  
22  
23  
24  
25  
26  
27  
28  
29  
30  
31  
32  
33  
34  
35  
36  
37  
38  
39  
40  
41  
42  
43  
44  
45  
46  
47  
48  
49  
50  
51  
52  
53  
54  
55  
56  
57  
58  
59  
60

Regardless of the capacity or location-based performance variations, improving the scale efficiency of hospitals would require long-term effort, reflected in amendments to health policies, strategic plans and the autonomy of hospital-managers.<sup>43</sup> The prevailing ability of patients to access health services should not be compromised while reallocating the resources to the other hospitals until Pareto optimality is achieved.<sup>13</sup>

The use of DEA can identify sources of inefficiency, helping hospital managers and health policy-makers to reach informed decisions.<sup>36</sup> The analysis showed that the number of full-time physicians was the most notable reason for inefficiency, with an average excess of 22.4%, from an input perspective. Other inputs among labour variables that showed a surplus in use were the number of nurses and the number of allied health personnel, in addition to excess number of hospital beds (capital variable). Analysis revealed a shortage of outputs production, e.g. hospitals needed to increase the number of outpatients and hospitalized inpatient services on average by 12.2% and 14.2% respectively, to be efficient.

Given the previous findings, health policy-makers might consider redeploying their labour forces from inefficient hospitals to more efficient ones.<sup>36,43</sup> Public hospitals should effectively utilize existing beds to increase efficiency. For example, in this study many large hospitals had been operating on DRS; however, most of the small hospitals were operating on IRS. Healthcare administrators should assess the legal conditions and regulations for the effective use of medical capacity in light of the findings of this slack analysis.

It had been argued by Afzali<sup>28</sup> and Hollingsworth<sup>16</sup> that many hospital databases are compromised by insufficient data on a broad range of hospital functions and care, e.g. preventive care, health promotion, staff development activities. Thus, improving hospital's databases through high quality data collection and processing techniques — including data from different health provision levels, capturing valid data that reflects the severity of cases and related health services, quality of care and pattern of activities — is very important.<sup>29,44</sup> Such improvement would facilitate further efficiency research by indicating weaknesses in healthcare production processes and consequently would guide policy-makers in potential reforms of health policy and directives.

In recent years, KSA has been facing the global trends of rising healthcare costs in addition to high growth rate of population and high prevalence of chronic diseases. The government

1  
2  
3 thus realized that the existing healthcare financing system with oil revenue is  
4 unsustainable<sup>45</sup>. It thus can be argued that optimum use of existing health resources, which  
5 is a fundamental requirement for achieving universal health coverage as advised by the  
6 World Health organization<sup>46</sup> can appropriately be applied for KSA. An application of these  
7 findings are useful for high income, and Gulf countries in particular, which have the same  
8 health financing systems and comparable demand for health services.<sup>2,3,18</sup> Our findings from  
9 this current analysis of KSA public hospitals indicated that there is large scope for improving  
10 efficiency in utilizing healthcare resources. We recommend the policy-makers to consider  
11 the appropriate use of resources within hospitals as well as reallocate resources across  
12 hospitals, given the findings of this research. Thus, to meet the efficient use of health  
13 resources to ensure the maximum value for money, which is expected to contribute  
14 significantly towards achieving universal health coverage in KSA.  
15  
16  
17  
18  
19  
20  
21  
22  
23  
24  
25

26 The study faced the challenges of finding data on economic values of the inputs, also severity  
27 of cases and quality of services of the outputs. We, however, could use the mortality rate as  
28 the proxy for quality of services. The performance assessment is devoted on how to utilize  
29 optimally the resources of the health sector in order to provide the given levels of health  
30 services. Thus, we rationally adopted input orientation in the assessment. However, DEA  
31 methodology also permits the assumption of output orientation. We did not apply output-  
32 oriented DEA models because outputs of different type than the ones used in the current  
33 study would need to be available.  
34  
35  
36  
37  
38  
39  
40

41 In this study we provide the optimal levels of resources that render efficient each hospital  
42 given the health services levels that each one of them provides. Further to estimating the  
43 optimal levels of resources, a different yet important assessment is to examine the allocation  
44 of these resources among the hospitals. This extension is left for future research. Despite a  
45 few limitations, the study site (KSA), and data sources might create strong interest among  
46 policy-makers, stakeholders, researchers and academics. This is the first research study of  
47 technical efficiency based on official data from KSA, that has considered public hospital  
48 capacities and geographical locations.  
49  
50  
51  
52  
53  
54  
55  
56  
57  
58  
59  
60

## Concluding Remarks

Given the scarcity of resources, growing expenditure on health and demand for health services, more attention should be paid to improving the efficiency of healthcare by better utilization of current resources. In this study, inefficiency existed in most public hospitals, and these could reduce their inputs by 24% without any reduction in service provision. Small hospitals and hospitals in the central region of KSA were relatively more efficient. A high proportion of hospitals were operating at non-optimal scale size, while an efficient scale of operation was observed in medium-sized hospitals.

The finding suggests that it would be helpful to adjust production capacity by downsizing hospitals operating on DRS and reallocating the resources to hospitals on the IRS, as reflected in the scale analysis. The application of these findings will require collaboration between health administrative, policy planning and daily operations management, to fill the administrative gap and thus overcome external environmental factors and manage internal hospital operations.

Performance analysis shows the surplus of the health workers and a shortage of health services to be major causes of inefficiency, implying that health regulators might redeploy their labour forces for effective utilization of medical capacity. A possible reallocation of resource must take place without compromising patients' current access to public-funded health services. We encourage further research in technical and allocative efficiency, to provide more specific results with a spotlight on inefficiency causes, given the goals, functions and strategic plans of public hospitals in KSA.

## Acknowledgement

We are grateful for the Ministry of Education and the government of Saudi Arabia for unlimited support. The authors would like to thank of the Administration of Statistics and Information and the Administration of Research and Studies in the Ministry of Health for providing access to the hospital's databases. Special gratitude to Mr Nabil A. Othman and Ms Nuwayyir Alshalawi at Administration of Statistics and Information for their contributions through permitting to use the administration's access to the necessary databases to complete the data collection.

## Contributors

1  
2  
3 AA, GK, LN and JK contributed to conceptualizing the research question, study design and  
4 settings and literature search. AA contributed to data collection and variable extraction. AA,  
5 GK and JK conducted the data analysis, interpretation, and writing the manuscript. AA, GK, LN  
6 and JK contributed to writing, reviewing and revising the manuscript. All authors finally  
7 reviewed the manuscript critically and approved the final version for submission.  
8  
9  
10  
11  
12

### 13 **Funding**

14  
15 There is no funding agency in the public, commercial or not-for-profit sectors to report for  
16 this submission.  
17  
18

### 19 **Competing interest**

20  
21 None declared.  
22  
23

### 24 **Data sharing statement**

25  
26 Data were extracted from the hospital databases at Administration of Statistics and  
27 Information in The Ministry of Health. Additional data are available if requested.  
28  
29

### 30 **Ethics approval**

31  
32 Ethics approval was obtained from the Ethics Committee of Institutional Review Board (IRB)  
33 of King Fahad Medical City, the Ministry of Health in Saudi Arabia (IRB log No. 18-166E).  
34  
35  
36  
37

### 38 **Patient consent for publication**

39  
40 Not required.  
41  
42  
43

## 44 **References**

- 45  
46 1. Khoja T, Rawaf S, Qidwai W *et al*. Health care in Gulf Cooperation Council countries: a  
47 review of challenges and opportunities. *Cureus* 2017;9(8):e1586. DOI  
48 10.7759/cureus.1586.  
49
- 50  
51 2. Ardent Advisory & Accounting. *GCC healthcare sector report. A focus area for*  
52 *governments*. Abu Dhabi, UAE, 2015 Accessed: January 2018: DOI:  
53 <http://www.ardentadvisory.com/files/GCC-Healthcare-Sector-Report.pdf>  
54  
55  
56  
57  
58  
59  
60

- 1  
2  
3 3. Ram P. Management of healthcare in the Gulf Cooperation Council (GCC) countries  
4 with special reference to Saudi Arabia. *International Journal of Academic Research in*  
5 *Business and Social Sciences* 2014; 4(12). DOI: 10.6007/IJARBSS/v4-i11/1326.  
6  
7
- 8  
9 4. Albejaidi F. Healthcare system in Saudi Arabia: an analysis of structure, total quality  
10 management and future challenges. *Journal of Alternative Perspectives in the Social*  
11 *Sciences* 2010;2(2):794-818.  
12  
13
- 14 5. Al-Homayan A, Shamsudin F, Subramaniam C, Islam R. Analysis of health care system  
15 — resources and nursing sector in Saudi Arabia. *Advances in Environmental Biology*  
16 2013;7(9), pp. 2584-2592.  
17  
18
- 19 6. MOH portal.com. 2017 Annual Statistical Book Available at:  
20 [https://www.moh.gov.sa/en/Ministry/Statistics/book/Documents/ANNUAL-](https://www.moh.gov.sa/en/Ministry/Statistics/book/Documents/ANNUAL-STATISTICAL-BOOK-1438H.pdf)  
21 [STATISTICAL-BOOK-1438H.pdf](https://www.moh.gov.sa/en/Ministry/Statistics/book/Documents/ANNUAL-STATISTICAL-BOOK-1438H.pdf) (Accessed Oct. 2018).  
22  
23
- 24 7. Almalki M, FitzGerald G, Clark M. Health care system in Saudi Arabia: an overview.  
25 *Eastern Mediterranean Health Journal* 2011;17(10).  
26  
27
- 28 8. MOH portal.com. 2015 Annual Statistical Book. Available at:  
29 [https://www.moh.gov.sa/en/Ministry/Statistics/book/Documents/StatisticalBook-](https://www.moh.gov.sa/en/Ministry/Statistics/book/Documents/StatisticalBook-1436.pdf)  
30 [1436.pdf](https://www.moh.gov.sa/en/Ministry/Statistics/book/Documents/StatisticalBook-1436.pdf).  
31  
32
- 33 9. Atilgan E. The technical efficiency of hospital inpatient care services: an application for  
34 Turkish public hospitals. *Isletme ve Ekonomi Arastirmalari Dergisi/Business and*  
35 *Economics Research Journal* 2016;7(2): 203–214. DOI: 10.20409/berj.2016217537.  
36  
37
- 38 10. The World Bank. 2019 Country Data. Available at:  
39 <https://data.worldbank.org/country/saudi-arabia> (accessed January 2019).  
40  
41
- 42 11. Mourshed M, Hediger V, Lambert T. Gulf Cooperation Council healthcare: challenges  
43 and opportunities. 2007; *Arab World Competitiveness Report (Part 5)*;55–64, World  
44 Economic Forum, Geneva, Switzerland 2007. DOI:  
45 [http://citeseerx.ist.psu.edu/viewdoc/download?doi=10.1.1.183.7279&rep=rep1&typ](http://citeseerx.ist.psu.edu/viewdoc/download?doi=10.1.1.183.7279&rep=rep1&type=pdf)  
46 [e=pdf](http://citeseerx.ist.psu.edu/viewdoc/download?doi=10.1.1.183.7279&rep=rep1&type=pdf)  
47  
48
- 49 12. MOH portal.com. *Ministry of Health Strategic Plan 2010–2020*. Available at:  
50 <https://www.moh.gov.sa/Portal/WhatsNew/Documents/OKIstragi260p.pdf>. (Accesse  
51 d October 2018).  
52  
53
- 54 13. Jacobs R, Smith P, Street A. *Measuring efficiency in health care: analytic techniques*  
55 *and health policy*. Cambridge; Cambridge University, p3–39/91-127, 2006.  
56  
57  
58  
59  
60

14. Farrell MJ. The Measurement of Productive Efficiency. *Journal of the Royal Statistical Society* 1957;120(3):253–290.
15. Hanson K, Atuyambe L, Kamwanga J *et al.* Towards improving hospital performance in Uganda and Zambia: reflections and opportunities for autonomy. *Health Policy* 2002;61, 73–94.
16. Hollingworth B. Non-parametric and parametric applications measuring efficiency in health care. *Healthcare Management Science* 2003;6:203–218.
17. Kelly E, Stoye G, Vera-Hernández M. Public hospital spending in England: evidence from National Health Service administrative records. *Fiscal Studies* 2016;37(3-4), pp.433–459.
18. Alatawi A, Ahmed S, Niessen L *and Khan J.* Systematic review and meta-analysis of public hospital efficiency studies in Gulf region and selected countries in similar settings. *Cost Effectiveness and Resource Allocation* 2019;17(17). doi.org/10.1186/s12962-019-0185-4
19. Helal S, Elimam H. Measuring the efficiency of health services areas in Kingdom of Saudi Arabia using data envelopment analysis (DEA): a comparative study between the years 2014 and 2006. *International Journal of Economics and Finance* 2017;9(4) pp172–184.
20. Abou El-Seoud M. Measuring efficiency of reformed public hospitals in Saudi Arabia: An application of data envelopment analysis. *International Journal of Economics and Management Sciences* 2013;2(9):44–53.
21. Hussey P, de Vries H, Romley J *et al.* A systematic review of health care efficiency measures. *Health Services Research and Educational Trust* 2009; 44(3):784–805. DOI: 10.1111/j.1475-6773.2008.00942.
22. Kiadaliri A, Jafari M, Gerdtham U. Frontier-based techniques in measuring hospital efficiency in Iran: a systematic review and meta-regression analysis. *BMC Health Services Research* 2013;13:312. <http://www.biomedcentral.com/1472-6963/13/312>
23. Hollingsworth B. The measurement of efficiency and productivity of health care delivery. *Health Economics* 2008;17:1107–28. DOI: 10.1002/hec.1391
24. Varabyova Y, Müller JM. The efficiency of health care production in OECD countries: a systematic review and meta-analysis of cross-country comparisons. *Health Policy* 2016;120(3) 252–263. <http://dx.doi.org/10.1016/j.healthpol.2015.12.005>

- 1  
2  
3  
4  
5  
6  
7  
8  
9  
10  
11  
12  
13  
14  
15  
16  
17  
18  
19  
20  
21  
22  
23  
24  
25  
26  
27  
28  
29  
30  
31  
32  
33  
34  
35  
36  
37  
38  
39  
40  
41  
42  
43  
44  
45  
46  
47  
48  
49  
50  
51  
52  
53  
54  
55  
56  
57  
58  
59  
60
25. Pelone F, Kringos, DF, Romaniello A *et al.* Primary care efficiency measurement using data envelopment analysis: a systematic review. *Journal of Medical Systems* 2015;; 39(1):156.
26. Cooper W, Seiford L, Tone K. Data envelopment analysis: a comprehensive text with models, applications, references and DEA-solver software. Springer, New York, p1-85, 2007. DOI: 10.1007/978-0-387-45283-8
27. Gok MS, Sezen B. Analyzing the ambiguous relationship between efficiency, quality and patient satisfaction in healthcare services: the case of public hospitals in Turkey. *Health Policy* 2013;111(3), pp 290-300. <http://dx.doi.org/10.1016/j.healthpol.2013.05.010>
28. Afzali HH, Moss JR, Mahmood MA. A conceptual framework for selecting the most appropriate variables for measuring hospital efficiency with a focus on Iranian public hospitals. *Health Services Management Research* 2009;22(2):81–91. DOI: 10.1258/hsmr.2008.008020
29. Sahin I, Ozcan YA. Public sector hospital efficiency for provincial markets in Turkey. *Journal of Medical Systems* 2000;24(6), pp 307–320.
30. Ahmed S, Hasan MZ, MacLennan M, et al. Measuring the efficiency of health systems in Asia: a data envelopment analysis. *BMJ Open* 2019;9: e022155. doi:10.1136/bmjopen-2018-022155
31. Dyson R, Allen R, Camanho A *et al.* Pitfalls and protocols in DEA. *European Journal of Operational Research* 2001;132(2):245–259.
32. Hollingsworth B. Evaluating efficiency of a health care system in the developed world. *Encyclopedia of Health Economics* 2014;1(18) pp.292-299.
33. Charnes A, Cooper W, Rhodes E. Measuring the efficiency of decision-making units. *European Journal of Operational Research* 1978;2(6), 429–444 (1978)
34. Banker R, Charnes A, Cooper W. Some models for estimating technical and scale inefficiencies in data envelopment analysis. *Management Science* 1984;30(9), 1078–1092



- 1  
2  
3 35. Chuang CL, Chang PC, Lin RH. An efficiency data envelopment analysis model  
4 reinforced by classification and regression tree for hospital performance evaluation.  
5 *Journal of Medical Systems* 2010;35(5):1075-83. Doi:10.1007/s10916-010-9598-5.  
6  
7  
8  
9 36. Gok MS, Altindag E. Analysis of the cost and efficiency relationship: experience in the  
10 Turkish pay for performance system. *European Journal of Health Economics*  
11 2015;16(5), pp 459–469. DOI 10.1007/s10198-014-0584-6  
12  
13  
14 37. O’Neill L, Rauner M, Heidenberger K *et al.* A cross-national comparison and taxonomy  
15 of DEA-based hospital efficiency studies. *Socio-Economic Planning Sciences*  
16 2008;42:158–189.  
17  
18  
19 38. Mahate A, Hamidi S. Frontier efficiency of hospitals in United Arab Emirates: An  
20 application of data envelopment analysis. *Journal of Hospital Administration* 2016;5(1)  
21 pp7–16. DOI: 10.1007/s10916-014-0156-4  
22  
23  
24 39. Ramanathan R. Operations assessment of hospitals in the Sultanate of Oman.  
25 *International Journal of Operations and Production Management*, 2005;25(1) pp 39-  
26 54. DOI: 10.1007/s10916-014-0156-4  
27  
28  
29 40. Charnes, A. and Cooper, W.W. Programming with Fractional Functions. *Naval*  
30 *Research Logistic Quarterly* (1962;(9): 181-186. DOI: org/10.1002/nav.3800090303  
31  
32  
33 41. Emrouznejad A, Thanassoulis E. *Performance Improvement Management Software:*  
34 *PIM-DEAssoft-V3.0 User Guide* May 2011; www.DEAssoftware.co.uk, Performance  
35 Improvement Management Limited, UK ISBN: 1-85449-412-2. Available at:  
36 <https://deazone.com/en/software>  
37  
38  
39 42. Shahhoseini R, Tofighi S, Jaafaripooyan E *et al.* Efficiency measurement in developing  
40 countries: application of data envelopment analysis for Iranian hospitals. *Health*  
41 *Services Management Research* 2010;24(2):75-80. DOI: 10.1258/hsmr.2010.010017  
42  
43  
44 43. Kiadaliri A, Haghparast-Bidgoli H, Zarei A. Measuring efficiency of general hospitals in  
45 the south of Iran. *World Applied Sciences Journal* 2011;13(6): 1310–1316.  
46  
47  
48 44. Afzali HH, Moss JR, Mahmood AM. Exploring health professionals’ perspectives on  
49 factors affecting Iranian hospital efficiency and suggestions for improvement.  
50 *International Journal of Health Planning and Management* 2011;26: e17–e29. DOI:  
51 10.1002/hpm.1035  
52  
53  
54  
55  
56  
57  
58  
59  
60

- 1  
2  
3 45. Al-Salem AA. Renovation of financing healthcare services in Kingdom of Saudi Arabia,  
4 by implementing National Health Insurance (NHI). *European Journal of*  
5 *Pharmaceutical and Medical Research*, 2018,5(9), 439-448.  
6  
7  
8  
9 46. World Health Organization. 2010. Health systems financing: the path to universal  
10 coverage, World Health Report 2010, Geneva.  
11  
12  
13  
14

## 15 **Tables**

16  
17  
18 Table 1: Budget appropriations for the MOH with respect to government budget (SR =  
19 Saudi Riyal)  
20

21  
22 Table 2: Descriptive statistics of the inputs and outputs of the 91 hospitals  
23

24  
25 Table 3: Technical efficiency scores and return to the scale of the public hospitals in KSA  
26

27  
28 Table 4 Technical efficiency scores and returns to the scale of the hospitals categorized by  
29 location  
30

31  
32 Table 5 Slacks evaluation for inefficient hospitals  
33

## 34 **Figures**

35  
36  
37 Figure 1: Number of hospitals and hospital beds in each capacity and geographical  
38 location, 2017.  
39

40  
41 Figure 2. Distribution of technical efficiency scores of the hospitals on technical (CRS),  
42 pure technical (VRS) and scale efficiencies.  
43  
44  
45  
46  
47  
48  
49  
50  
51  
52  
53  
54  
55  
56  
57  
58  
59  
60



Figure 1: Number of hospitals and hospital beds in each capacity and geographical location, 2017.

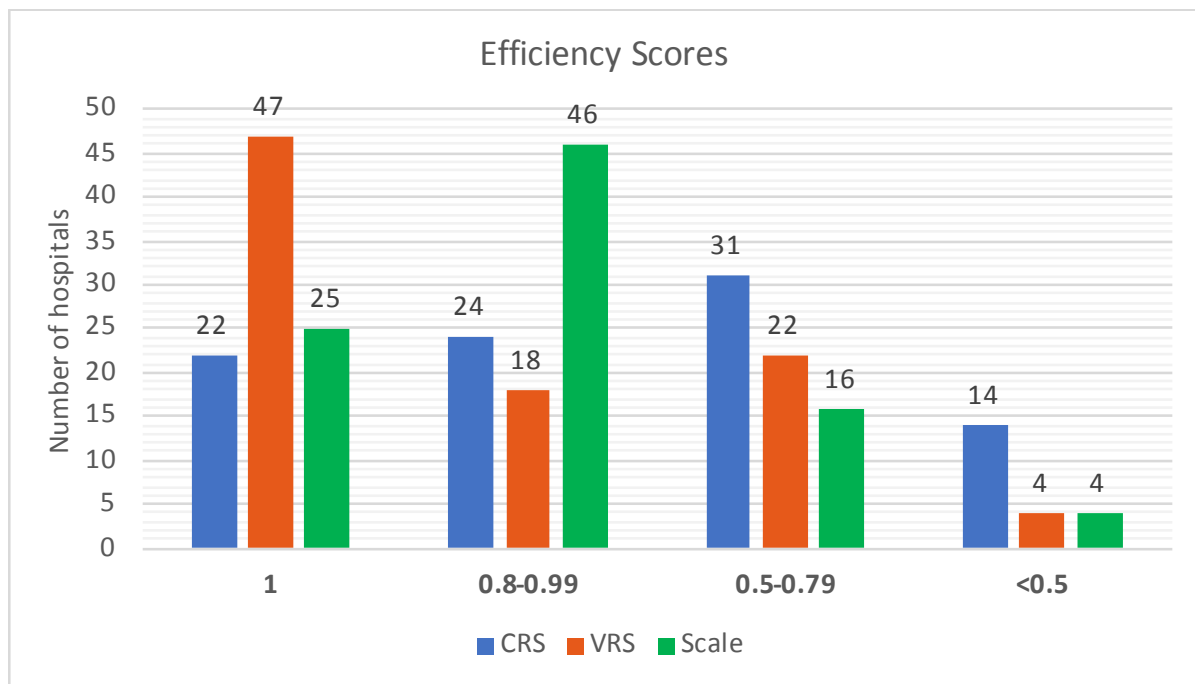

Figure 2. Distribution of technical efficiency scores of the hospitals on technical (CRS), pure technical (VRS) and scale efficiencies.

**STROBE 2007 (v4) Statement—Checklist of items that should be included in reports of *cross-sectional studies***

| Section/Topic                | Item # | Recommendation                                                                                                                                                                       | Reported on page # |
|------------------------------|--------|--------------------------------------------------------------------------------------------------------------------------------------------------------------------------------------|--------------------|
| <b>Title and abstract</b>    | 1      | (a) Indicate the study's design with a commonly used term in the title or the abstract                                                                                               | 0                  |
|                              |        | (b) Provide in the abstract an informative and balanced summary of what was done and what was found                                                                                  | 1                  |
| <b>Introduction</b>          |        |                                                                                                                                                                                      |                    |
| Background/rationale         | 2      | Explain the scientific background and rationale for the investigation being reported                                                                                                 | 2,3                |
| Objectives                   | 3      | State specific objectives, including any prespecified hypotheses                                                                                                                     | 4                  |
| <b>Methods</b>               |        |                                                                                                                                                                                      |                    |
| Study design                 | 4      | Present key elements of study design early in the paper                                                                                                                              | 4                  |
| Setting                      | 5      | Describe the setting, locations, and relevant dates, including periods of recruitment, exposure, follow-up, and data collection                                                      | 6,7                |
| Participants                 | 6      | (a) Give the eligibility criteria, and the sources and methods of selection of participants                                                                                          | n/a                |
| Variables                    | 7      | Clearly define all outcomes, exposures, predictors, potential confounders, and effect modifiers. Give diagnostic criteria, if applicable                                             | 7,8                |
| Data sources/<br>measurement | 8*     | For each variable of interest, give sources of data and details of methods of assessment (measurement). Describe comparability of assessment methods if there is more than one group | 4,5,6,7            |
| Bias                         | 9      | Describe any efforts to address potential sources of bias                                                                                                                            | n/a                |
| Study size                   | 10     | Explain how the study size was arrived at                                                                                                                                            | 7                  |
| Quantitative variables       | 11     | Explain how quantitative variables were handled in the analyses. If applicable, describe which groupings were chosen and why                                                         | 6,7,8              |
| Statistical methods          | 12     | (a) Describe all statistical methods, including those used to control for confounding                                                                                                | 5,6                |
|                              |        | (b) Describe any methods used to examine subgroups and interactions                                                                                                                  | 7                  |
|                              |        | (c) Explain how missing data were addressed                                                                                                                                          | 7                  |
|                              |        | (d) If applicable, describe analytical methods taking account of sampling strategy                                                                                                   | 8                  |
|                              |        | (e) Describe any sensitivity analyses                                                                                                                                                | n/a                |
| <b>Results</b>               |        |                                                                                                                                                                                      |                    |

|                          |     |                                                                                                                                                                                                              |            |
|--------------------------|-----|--------------------------------------------------------------------------------------------------------------------------------------------------------------------------------------------------------------|------------|
| Participants             | 13* | (a) Report numbers of individuals at each stage of study—eg numbers potentially eligible, examined for eligibility, confirmed eligible, included in the study, completing follow-up, and analysed            | n/a        |
|                          |     | (b) Give reasons for non-participation at each stage                                                                                                                                                         | n/a        |
|                          |     | (c) Consider use of a flow diagram                                                                                                                                                                           | n/a        |
| Descriptive data         | 14* | (a) Give characteristics of study participants (eg demographic, clinical, social) and information on exposures and potential confounders                                                                     | 8,9        |
|                          |     | (b) Indicate number of participants with missing data for each variable of interest                                                                                                                          | 7          |
| Outcome data             | 15* | Report numbers of outcome events or summary measures                                                                                                                                                         | 9,10,11,12 |
| Main results             | 16  | (a) Give unadjusted estimates and, if applicable, confounder-adjusted estimates and their precision (eg, 95% confidence interval). Make clear which confounders were adjusted for and why they were included | 9,10       |
|                          |     | (b) Report category boundaries when continuous variables were categorized                                                                                                                                    | 9,10,11    |
|                          |     | (c) If relevant, consider translating estimates of relative risk into absolute risk for a meaningful time period                                                                                             | n/a        |
| Other analyses           | 17  | Report other analyses done—eg analyses of subgroups and interactions, and sensitivity analyses                                                                                                               | 11,12      |
| <b>Discussion</b>        |     |                                                                                                                                                                                                              |            |
| Key results              | 18  | Summarise key results with reference to study objectives                                                                                                                                                     | 12,13,14   |
| Limitations              | 19  | Discuss limitations of the study, taking into account sources of potential bias or imprecision. Discuss both direction and magnitude of any potential bias                                                   | 15         |
| Interpretation           | 20  | Give a cautious overall interpretation of results considering objectives, limitations, multiplicity of analyses, results from similar studies, and other relevant evidence                                   | 14,15      |
| Generalisability         | 21  | Discuss the generalisability (external validity) of the study results                                                                                                                                        | 13,14,15   |
| <b>Other information</b> |     |                                                                                                                                                                                                              |            |
| Funding                  | 22  | Give the source of funding and the role of the funders for the present study and, if applicable, for the original study on which the present article is based                                                | 16         |

\*Give information separately for cases and controls in case-control studies and, if applicable, for exposed and unexposed groups in cohort and cross-sectional studies.

**Note:** An Explanation and Elaboration article discusses each checklist item and gives methodological background and published examples of transparent reporting. The STROBE checklist is best used in conjunction with this article (freely available on the Web sites of PLoS Medicine at <http://www.plosmedicine.org/>, Annals of Internal Medicine at <http://www.annals.org/>, and Epidemiology at <http://www.epidem.com/>). Information on the STROBE Initiative is available at [www.strobe-statement.org](http://www.strobe-statement.org).

# BMJ Open

## Efficiency evaluation of public hospitals in Saudi Arabia: An application of Data Envelopment Analysis

|                                 |                                                                                                                                                                                                                                                                                                                                                                                                                                                                                            |
|---------------------------------|--------------------------------------------------------------------------------------------------------------------------------------------------------------------------------------------------------------------------------------------------------------------------------------------------------------------------------------------------------------------------------------------------------------------------------------------------------------------------------------------|
| Journal:                        | <i>BMJ Open</i>                                                                                                                                                                                                                                                                                                                                                                                                                                                                            |
| Manuscript ID                   | bmjopen-2019-031924.R2                                                                                                                                                                                                                                                                                                                                                                                                                                                                     |
| Article Type:                   | Original research                                                                                                                                                                                                                                                                                                                                                                                                                                                                          |
| Date Submitted by the Author:   | 07-Oct-2019                                                                                                                                                                                                                                                                                                                                                                                                                                                                                |
| Complete List of Authors:       | Alatawi, Ahmed; Liverpool School of Tropical Medicine, Health Economics, department of Clinical Sciences; Al-Jouf University College of Pharmacy, Clinical Pharmacy<br>Niessen, Louis; Liverpool School of Tropical Medicine, Health Economics; University of Warwick, Dept of Health Sciences<br>Khan, Jahangir; Liverpool School of Tropical Medicine, Health Economics; International Centre for Diarrhoeal Disease Research Bangladesh, Health Systems and Population Studies Division |
| <b>Primary Subject Heading</b>: | Health economics                                                                                                                                                                                                                                                                                                                                                                                                                                                                           |
| Secondary Subject Heading:      | Health economics, Health policy, Public health, Health services research                                                                                                                                                                                                                                                                                                                                                                                                                   |
| Keywords:                       | Technical efficiency, Data Envelopment Analysis, Saudi Arabia, Public hospital, General hospital efficiency                                                                                                                                                                                                                                                                                                                                                                                |
|                                 |                                                                                                                                                                                                                                                                                                                                                                                                                                                                                            |

SCHOLARONE™  
Manuscripts

**Title****Efficiency Evaluation of Public Hospitals in Saudi Arabia: An Application of Data Envelopment Analysis****Authors:** Ahmed Alatawi<sup>\*,a,b</sup>, Louis Niessen<sup>c,d</sup>, Jahangir A. M. Khan<sup>c,e</sup>**Affiliations:**<sup>a</sup> Liverpool School of Tropical Medicine, Department of Clinical Sciences, Liverpool, United Kingdom.<sup>b</sup> University of Al-Jouf, Pharmacy College, Department of Clinical Pharmacy, Skaka, Saudi Arabia.<sup>c</sup> Liverpool School of Tropical Medicine, Department of International Public Health, Liverpool, United Kingdom.<sup>d</sup> University of Warwick, Division of Health Sciences, Coventry, United Kingdom.<sup>e</sup> Karolinska Institute, Department of Learning, Informatics, Management and Ethics, Stockholm, Sweden.**1. Ahmed Alatawi\***, MSc, Pharm.D. (**Corresponding author**)

PhD Candidate - Health Economist

Health Economics Group, Department of Clinical Sciences, Room 1966-215, Liverpool School of Tropical Medicine, LSTM, Pembroke Place, Liverpool, L3 5QA, United Kingdom.

Mobile: +4407491496786

Fax: +44(0)151 705 3370

Email: [Ahmed.alatawi@lstmed.ac.uk](mailto:Ahmed.alatawi@lstmed.ac.uk)**2. Louis Niessen, Professor**

Chair of Health Economics.

Health Economics Group, Department of Clinical Sciences, Room 1966-206, Liverpool School of Tropical Medicine, LSTM, Pembroke Place, Liverpool, L3 5QA, United Kingdom.

Tel: +44 (0)151 705 3779. Email: [louis.niessen@lstmed.ac.uk](mailto:louis.niessen@lstmed.ac.uk)**3. Jahangir A. M. Khan, PhD**

Senior Lecturer in Health Economics

Health Economics Group, Department of International Public Health, Room 1966-215, Liverpool School of Tropical Medicine, LSTM, Pembroke Place, Liverpool, L3 5QA, United Kingdom.

Tel: +44 (0)151 702 9345. Email: [jahangir.khan@lstmed.ac.uk](mailto:jahangir.khan@lstmed.ac.uk)**Word count:** 5,664**Keywords:** Technical efficiency, Data envelopment analysis, Saudi Arabia, Public hospitals, General hospitals efficiency.



## Abstract

**Objective:** In this study we assess the performance of public hospitals in Saudi Arabia. We detect the sources of inefficiency and estimate the optimal levels of the resources that provide the current level of health services. We enrich our analysis by employing locations and capacities of the hospitals.

**Design:** We employ Data Envelopment Analysis (DEA) to measure the technical efficiency of 91 public hospitals. We apply the input-oriented CCR and BCC models under constant and variable returns-to-scale (CRS and VRS). The assessment includes four inputs, and six output variables taken from ministry of health databases for 2017. We conducted the assessment via PIM-DEA 3.2 software.

**Setting:** Ministry of health-affiliated hospitals in the Kingdom of Saudi Arabia (KSA).

**Results:** Findings identified 75.8% (69 of 91) of public hospitals as technically inefficient. The average efficiency-score was 0.76, indicating that hospitals could have reduced their inputs by 24% without reduction in health-service provision. Small hospitals, (efficiency-score 0.79), were more efficient than medium-sized and large hospitals. Hospitals in the central-region were more efficient (efficiency-score 0.83), than those located in other geographic-locations. More than half of the hospitals (62.6%) were operating sub-optimally in terms of the scale-efficiency, implying that to improve efficiency, they need to alter their production capacity. Performance analysis identified overuse of physician's numbers and shortage of health-services production, as major causes of inefficiency.

**Conclusion:** Most hospitals were technically inefficient and operating at sub-optimal scale size and indicate that many hospitals may improve their performance through efficient utilization of health resources to provide the current level of health services. Changes in the production capacity are required, to facilitate optimal use of medical capacity. The inefficient hospitals could benefit from these findings to benchmarking their system and performance in light of the efficient hospital within their capacity and geographic location.

**Strengths and limitations of this study:**

- The study challenged to find data on economic values, severity of cases and quality of services. We expanded the selection of the variables to cover a broad range of health services and resources in the hospitals.
- The hospital mortality rate was included in output variables as a proxy of the service quality in the studied hospitals.
- We did not apply output-oriented DEA models, alternatively, we adopted input-orientation, since we aimed to estimate the optimum levels of the resources without deteriorating the health services.
- Further estimation of the optimal levels of resources is required, to examine the allocation of these resources among the hospitals.
- This is the first performance assessment of public hospitals in Saudi Arabia that uses real data obtained directly from official databases of the Ministry of Health.

## Introduction

Increasing demand for healthcare and the expenditure required to provide efficient, equitable and effective healthcare systems, are global concerns. The Kingdom of Saudi Arabia (KSA) has experienced these recently, alongside substantial population growth, increased life expectancy and the proliferation of lifestyle-related disease. These have increased the demand for health services at a time of scant resource.<sup>1,2,3</sup>

During 2015, KSA government spending on health was 71.3% of the country's total health expenditure, which corresponds to 4.1% of GDP for that year.<sup>4</sup> Healthcare expenditure in KSA increased by 24.7% between 2013 and 2017 (Table 1).<sup>1,2,5</sup> While public spending on health in KSA is remarkably high in comparison to many high-income countries (71.3% for KSA versus 61.2% for high-income countries), the number of hospital beds is considerably lower.<sup>3,4</sup> In other words, the cost of each hospital-bed in the KSA is remarkably higher than those in other high-income countries.

Although much has been done to promote the efficient use of resources, this has proven insufficient to meet the rising health expenditure and demand for healthcare in KSA.<sup>6,7</sup> Providers seem to find it very challenging to deliver adequate provision using current resources.<sup>8</sup> There seems to be an imbalance between health service availability and health spending, so better use of resources is necessary if KSA is to have an efficient and appropriate

1  
2  
3 health system.<sup>7</sup> It is thus important to investigate how existing resources can be used more  
4 efficiently for meeting the demand for healthcare in the country.  
5  
6

7 Governments worldwide conduct performance assessments of their health sectors, to ensure  
8 that public funds are effectively utilized.<sup>9</sup> Efficiency evaluation is carried out under different  
9 concepts, such as technical, allocative, cost and overall efficiency.<sup>9</sup> Of these, the technical  
10 efficiency approach is most commonly used. This is based on Farrell's theory of 1957, which  
11 introduced a measure of technical efficiency based on comparison of the inputs and outputs  
12 of set entities, called decision making units (DMUs).<sup>10</sup>  
13  
14

15 Hospital efficiency is crucial to the efficiency of the health system generally, as hospitals are  
16 key consumers of health resources.<sup>11,12</sup> Hanson et al. (2002) found that public hospitals  
17 consume around 40% of the total health budget in many sub-Saharan African countries.<sup>11</sup>  
18 Public hospitals used almost 44% of the health spending in the United Kingdom in 2012/13.<sup>13</sup>  
19  
20

21 In general, there is a scarcity of studies and empirical works on the performance assessment  
22 of public hospitals, and this rarity is particularly acute in the context of KSA.<sup>14</sup> Systematic  
23 review of public hospital efficiency studies in the Gulf region and similar countries has shown  
24 the number of studies to be limited, as efficiency analysis is a novel approach to research in  
25 the Gulf, including KSA.<sup>14</sup> The review found only two studies based in KSA context; a study by  
26 Helal and Elimam in 2017<sup>15</sup>, which assessed the efficiency of health services at districts level  
27 in KSA. Another efficiency analysis conducted in 2013 of 20 public hospitals, under private  
28 sector management, which found that 60% of the study sample had not achieved the efficient  
29 score.<sup>16</sup>  
30  
31  
32  
33  
34  
35  
36  
37  
38  
39  
40  
41  
42  
43

44 Hospital efficiency has hitherto been measured mainly by frontier analysis methods, either  
45 through non-parametric data envelopment analysis (DEA) or as parametric stochastic frontier  
46 analysis (SFA).<sup>9</sup> These methods compare hospital performance with an estimated efficient  
47 frontier comprising the best-performing hospitals.<sup>17,18</sup>  
48  
49  
50

51 Data envelopment analysis has for many years been the most commonly-used technique for  
52 measuring the relative efficiency in healthcare.<sup>12,19</sup> Systematic reviews of efficiency studies  
53 have often identified that DEA to be the predominant method of public hospital efficiency  
54 assessments among studies reviewed.<sup>12,14,19</sup> Hollingworth et al. (2003, 2008) conducted  
55 systematic reviews of efficiency analysis internationally and noticed that DEA was used in  
56  
57  
58  
59  
60

1  
2  
3 around the half of studies, a further fifth used DEA in with some form of secondary  
4 regressions.<sup>12,19</sup> Another review<sup>18</sup>, of efficiency in Iranian hospitals, found DEA was applied  
5 in all reviewed studies; three of those studies also used SFA to estimate efficiency scores. A  
6 systematic review of health system efficiency studies in OECD countries<sup>20</sup> found that DEA was  
7 applied in 64% of them.  
8  
9

10  
11  
12  
13 In this study we conduct a performance assessment of the MOH-administered general  
14 hospitals in KSA. We measure the technical efficiency of public hospitals and identify the  
15 sources of inefficiency and estimate the optimal levels of the resources. We also provide  
16 subscriptions for improvements so as the inefficient hospitals to be rendered efficient. At a  
17 post optimality phase, we enrich our analysis by employing information about the  
18 geographical location and the capacity (number of beds) of the hospitals. Thus, this  
19 performance assessment provides useful information to the decision-makers, which can be  
20 employed for policy reforms, to optimise the use of health resources in public hospitals and  
21 consequently improve the efficiency of healthcare systems.  
22  
23  
24  
25  
26  
27  
28  
29

### 30 Public health system in KSA

31 Under article 31 of the national constitution, the KSA government guarantees free medical  
32 care to all citizens.<sup>8</sup> The government finances the public sector annually, largely from revenue  
33 derived from oil and gas production.<sup>21</sup> Table 1 shows the proportion of national budget  
34 allocated to the KSA's ministry of health (MOH).<sup>5</sup> Thus, the available resources should be  
35 utilized optimally.  
36  
37  
38  
39  
40  
41

42 The MOH is the primary provider of healthcare services in KSA, administering 60% of all  
43 provision.<sup>22</sup> It is the dominant provider of health services in the public sector.<sup>22,23</sup> Other  
44 government agencies, including the ministry of defence, the national guard and universities,  
45 share the remaining of healthcare provision, as does the private sector.<sup>21</sup> The MOH delivers  
46 primary, secondary and tertiary healthcare through 2,361 primary healthcare centres and 282  
47 hospitals, administering 43,080 beds throughout the country.<sup>5</sup> Other MOH functions include  
48 strategic planning, formulation of health policy, supervision of all health service delivery  
49 programs and the monitoring and management of all other health-related activities.<sup>22</sup> Public  
50 (MOH-affiliated) hospitals in KSA can be broadly classified into two groups, general hospitals  
51 with different capacities (number of beds) and specialised hospitals. General hospitals  
52  
53  
54  
55  
56  
57  
58  
59  
60

provide a wide range of health services, while specialised hospitals deliver health services for a specific health condition or to a particular group of beneficiaries. General hospitals in KSA are located in various geographic locations and serve populations of different demographic characteristics and needs, which may affect the hospital performance, as observed in other studies.<sup>8,24</sup>

**Table 1:** Budget appropriations for the MOH with respect to government budget (SR = Saudi Riyal)

| Year | Government Budget Billion SR | MOH Budget Billion SR | Percentage of MOH to the government budget | No. of Hospitals | No. of Beds |
|------|------------------------------|-----------------------|--------------------------------------------|------------------|-------------|
| 2013 | 820                          | 54.3                  | 6.63%                                      | 268              | 38970       |
| 2014 | 855                          | 59.9                  | 7.02%                                      | 270              | 40300       |
| 2015 | 860                          | 62.3                  | 7.25%                                      | 274              | 41297       |
| 2016 | 840                          | 58.9                  | 7.01%                                      | 274              | 41835       |
| 2017 | 890                          | 67.7                  | 7.61%                                      | 282              | 43080       |

Source; Ministry of Health; Statistical yearbook, 2017.

## Methods

### Population and selection of sample

As the application of DEA is based on a homogenous (comparative) sample that use similar inputs to produce similar outputs, we focused on examining the technical efficiency for general hospitals.<sup>9</sup>

Hollingsworth (2008) and Varabyova (2016) argued that the hospitals under evaluation should be of same type and provide the same services and health activities.<sup>19,20</sup> Since the inclusion of divergent specialist units in the same sample will confound the results — frontier techniques are susceptible to outliers.<sup>19,20</sup> Specialised hospitals often lack types of secondary service, e.g. surgical operations rarely occur in psychiatric hospitals, and such hospitals, if included, will appear as inefficient while surgery is a considered as one of the outputs.<sup>18,19,25</sup> Specialised hospitals were therefore excluded from this analysis. Similarly, small hospitals (with 50 beds or fewer) provide primary care services while lacking secondary and tertiary health services, and consequently miss a significant number of output variables (e.g. inpatient services, patient discharge, surgical operations, laboratory testing) compared to bigger hospitals. In this study we excluded also the smaller hospitals, to ensure greater homogeneity in performance evaluation across the units.<sup>9,26</sup>

1  
2  
3 Ultimately, the homogenous sample used in the analysis included 21,528 out of 398,68 (54%)  
4 of the total active hospital beds provided by the MOH in KSA. We included in the assessment  
5 97 general hospitals and removed six of them, due to missing data. The data of hospital inputs  
6 and outputs for 2017 was collected by the lead author from official statistical, informational  
7 and research databases of Administration of Statistics and Information and Administration of  
8 Research and Studies, which affiliated of the MOH, following approval from the designated  
9 authority. Data collection took place from May to July 2018.

10  
11  
12  
13  
14  
15  
16  
17 The sample hospitals are in 64 cities, affiliated to 20 administrative districts, located in five  
18 geographic regions, namely central, west, east, south and north regions. The general hospitals  
19 in the sample are classified into four groups based on their capacity (number of beds): small  
20 (fewer than 200 beds), lower-medium (200 to 299 beds), upper-medium (300 to 499 beds)  
21 and large (500 or more beds) hospitals, following Gok's<sup>27</sup> categorization. However, these  
22 hospitals are affiliated, organized and funded by the MOH, and have not autonomy in term  
23 of funding or organising structure by themselves or other agents. Thus, we applied the DEA  
24 model for all 91 hospitals. Then, we presented the efficiency scores in each capacity and each  
25 geographic location. Figure 1 illustrates number of hospitals and hospital-beds in each  
26 category of capacity and location.  
27  
28  
29  
30  
31  
32  
33  
34  
35  
36  
37

38 Figure 1 to be inserted here  
39  
40  
41  
42

### 43 Inputs and outputs

44  
45 The selection of input and output variables is a crucial step in performance measurement,  
46 because the results of any efficiency assessment depend significantly on the variables used in  
47 the estimation models.<sup>28</sup> The literature has focused on labour (e.g. health professionals) and  
48 capital (e.g. number of beds), as input variables, while some studies included consumable  
49 resources.<sup>9,28</sup> The main categories of output used in healthcare-related efficiency studies  
50 were healthcare activities (e.g. number of outpatient visits, inpatient services, number of  
51 surgeries) and health outcomes (e.g. mortality rate).<sup>9,18,20</sup>  
52  
53  
54  
55  
56  
57  
58  
59  
60

1  
2  
3 In our study we selected the hospital outputs that dependent on the selected inputs, which  
4 cover a broad range of health services provided and health resources used by public hospitals  
5 in KSA. In particular, four inputs and six outputs were chosen based on the availability of the  
6 data in KSA context, which were rationally approved in previous theoretical and empirical  
7 studies.<sup>9,12,19</sup>  
8  
9

10  
11  
12  
13 The input variables chosen are: (1) number of hospital beds; (2) number of full-time  
14 physicians; (3) number of full-time nurses and (4) number of full-time allied health personnel  
15 (i.e. pharmacists, midwives, medical technicians, medical radiologists, physiotherapists)  
16 employed in the hospital. The output variables used in this study are: (1) outpatient visits  
17 (number of patients receiving outpatient treatment within a year); (2) discharged patients  
18 (number of patients receiving inpatient treatment within a year); (3) total number of surgical  
19 operations during the year; (4) number of radiological investigations conducted in hospital  
20 during the year; (5) number of laboratory tests during the year; (6) hospital mortality rate  
21 (ratio of inpatient deaths during hospitalization to the total number of inpatients that year).  
22 The last output variable is an indicator of health service quality and health outcomes in  
23 hospital, as argued by Sahin and Ozcan.<sup>29</sup> Reduction in the mortality rate and increase  
24 quantity of life signify an improvement in the health outcomes of the public hospital of  
25 investigation. Therefore, mortality rate could be a proxy for a weighted health quality  
26 measure in our assessment.<sup>30</sup> The inverse value for the mortality rate (one divided by  
27 mortality rate) is included as an output value in the assessment, meaning that hospitals with  
28 higher mortality rate would have a smaller ratio as output values.<sup>29</sup> As the model assumes  
29 that output and input variables are isotonic, (i.e., increased input reduces efficiency as well  
30 as increased output increases efficiency). We had to apply this correction, otherwise, a higher  
31 mortality rate would incorrectly contribute to a better hospital outcome.<sup>30</sup>  
32  
33  
34  
35  
36  
37  
38  
39  
40  
41  
42  
43  
44  
45  
46  
47

48 The number of hospitals (DMUs in DEA context) should be at least two times larger than the  
49 sum of inputs and outputs.<sup>31</sup> However, Hollingsworth (2014)<sup>32</sup> suggested that the number of  
50 units used in efficiency assessment should be at least three times the sum of inputs and  
51 outputs. In accordance to the above-mentioned rule of thumb, in this study we include 91  
52 hospitals, more than three times the combined number of input and output variables.  
53  
54  
55  
56  
57

### 58 **Patient and Public Involvement**

59  
60

1  
2  
3 No patients were involved in this study, and we used anonymous data from MOH databases.  
4  
5

## 6 Data Envelopment Analysis

7  
8 Data Envelopment Analysis (DEA) is a powerful technique that is based on linear  
9 programming. It was developed for measuring the performance of a set of comparable  
10 entities, called Decision Making Units (DMUs), which convert multiple inputs into multiple  
11 outputs.<sup>26,32</sup> In this method each hospital is compared against the estimated efficient frontier  
12 comprising the best-performing hospitals.<sup>17,18</sup>  
13  
14  
15  
16

17  
18 DEA has been already the most commonly-used technique for measuring the relative  
19 efficiency in healthcare.<sup>12,19</sup> In systematic reviews we can observe that DEA is the  
20 predominant method of public hospital efficiency assessment.<sup>12,14,19</sup> DEA is widely applicable  
21 since does not require any a priori specification of the underlying functional form that relates  
22 the inputs with the outputs.<sup>9</sup> In addition, use of DEA is justified by its ability to incorporate  
23 multiple inputs and outputs in different units of assessment.<sup>9,32</sup>  
24  
25  
26  
27  
28

29  
30 Several DEA models have been developed to analyze the efficiency based on Farrell's  
31 concept.<sup>10</sup> The most well known and basis for the rest DEA models is the CCR model  
32 developed by Charnes, Cooper and Rhodes,<sup>33</sup> which assumes that production has constant  
33 returns to scale (CRS) and the BCC model developed by Banker, Charnes and Cooper,<sup>34</sup> under  
34 the assumption of variable returns to scale (VRS).<sup>9,12</sup> The choice of CCR or BCC model depends  
35 on the context of the problem under examination, i.e. the technology linking the inputs to  
36 outputs in the transformation process.<sup>9</sup>  
37  
38  
39  
40  
41  
42

43  
44 Generally, the CCR model — whereby the efficiency frontier has a constant slope (CRS), which  
45 means that any change in the inputs results to a proportional change in the outputs.<sup>26</sup>  
46 Constant returns to scale CRS may be adopted when machines are involved in the process,  
47 which roughly means that the production can be doubled by doubling the levels of inputs.  
48 However, when employees (human factor) participate in the production process, then it is  
49 naive to expect that they could work at a constant rate. The CCR efficiency assessment by the  
50 may be affected if the DMUs are not operating on the optimal scale, since CRS does not  
51 distinguish between the scale and pure (managerial) technical efficiency.<sup>35</sup> If the efficiency  
52 analysis considers a managerial perspective, a BCC technology assumption will be appropriate  
53 to understand if a scale of operations or provider's practice affects productivity.<sup>27,36</sup> Scale  
54  
55  
56  
57  
58  
59  
60



1  
2  
3 efficiency is defined as a ratio of CRS to VRS efficiency scores and provides evidence whether  
4 the DMU is operating on the optimal scale size.<sup>12,20</sup> Furthermore, the efficiencies of DMUs can  
5 be comprehensively analysed using both CRS and VRS assumption for more realistic changes  
6 in production process, and implications in the real world.<sup>9,26</sup> Other systematic reviews<sup>20,25</sup>  
7 have reported similar findings where studies used both CRS and VRS assumptions in efficiency  
8 measurements.

9  
10 Rationally, the commonly-used orientations in DEA analysis are input orientation (i.e.  
11 minimization of inputs with the given amount of outputs) and output orientation (i.e. inputs  
12 are held constant and outputs are proportionally increased).<sup>26</sup> Previous empirical studies<sup>35</sup>  
13 have argued that hospitals have relatively little control over their outputs (for example,  
14 expanding surgical operations), but more control over the inputs (e.g. medical devices), where  
15 they have the social responsibility to provide medical treatment through the public hospitals  
16 in general. Thus, most studies adopt input orientation for efficiency assessment of the  
17 hospitals.<sup>20,25,37</sup> In a few studies output orientation is adopted in response to the strategic  
18 health plans of the countries aiming to expand healthcare provision during a specific  
19 period.<sup>38,39</sup> However, in our study we aim to estimate the optimal levels of the resources  
20 without deteriorating the levels of the health services that the hospitals provide. In this way,  
21 we provide the central authorities with the potential savings that could be made in the health  
22 sector.

23  
24 The efficiency of a hospital is defined as the ratio of the weighted sum of outputs (total virtual  
25 output) to the weighted sum of inputs (total virtual input), with the weights being obtained  
26 in favour of each evaluated unit by the optimization process. Assume  $n$  DMUs, each using  $m$   
27 inputs to produce  $s$  outputs. We denote the vector of inputs for DMU  $j$  is  $X_j = (x_{1j}, \dots, x_{mj})^T$   
28 and the vector of outputs is  $Y_j = (y_{1j}, \dots, y_{sj})^T$ . The model (1) is formulated and solved for each  
29 hospital in order to obtain its efficiency score. The variables  $\eta = (\eta_1, \dots, \eta_m)$  and  $\omega = (\omega_1, \dots, \omega_s)$  are  
30 the weights associated with the inputs and the outputs respectively. These weights are  
31 calculated in a manner that they provide the highest possible efficiency score for each hospital  
32  $j_0$  under evaluation.

33  
34 The input-oriented BCC model that provides the efficiency for the hospital  $j_0$  under VRS  
35 assumption is given below:

$$\begin{aligned}
 & \max e_{j_0} = \frac{\omega Y_{j_0} - \omega_o}{\eta X_{j_0}} \\
 & \text{s.t.} \\
 & \frac{\omega Y_j - \omega_o}{\eta X_j} \leq 1, \quad j = 1, \dots, n \\
 & \eta \geq 0, \omega \geq 0
 \end{aligned} \tag{1}$$

Notice that by excluding the free of sign variable  $\omega_o$  from model (1), the CCR model is obtained. The fractional model (1) can be transformed to a linear program by applying the Charnes and Cooper (1962) transformation (C-C transformation hereafter).<sup>40</sup> The transformation is carried out by considering a scalar  $t \in \mathfrak{R}^+$  such as  $t\eta X_{j_0} = 1$  and multiplying all terms of model (1) with  $t > 0$  so that  $v = t\eta$ ,  $u = t\omega$ ,  $u_o = t\omega_o$ . The linear equivalent of model (1) is formulated as:

$$\begin{aligned}
 & \max uY_{j_0} - u_o \\
 & \text{s.t.} \\
 & vX_{j_0} = 1 \\
 & uY_j - u_o - vX_j \leq 0, \quad j = 1, \dots, n \\
 & v \geq 0, u \geq 0
 \end{aligned} \tag{2}$$

Once an optimal solution  $v^*$ ,  $u^*$ ,  $u_o^*$  of model (2) is derived, the input-oriented BCC-efficiency  $e_{j_0}^*$  for the hospital <sub>$j_0$</sub>  under evaluation is obtained directly from the objective function.

Banker et al (1984) determined the returns to scale (RTS) using the optimal value of the free variable  $u_o$  in the multiplier model (2).<sup>34</sup> Given the point  $(x_0, y_0)$  that lies on the efficient frontier, the returns to scale at this point are identified by the following three conditions:

1. Increasing returns to scale (IRS) prevail at  $(x_0, y_0)$  if and only if  $u_o^* < 0$  for all optimal solutions. Meaning the increase in all production factors (inputs) resulted in more production (outputs).
2. Decreasing returns to scale (DRS) prevail at  $(x_0, y_0)$  if and only if  $u_o^* > 0$  for all optimal solutions, meaning an equal increase in all production factors led to less production.

3. Constant returns to scale (CRS) prevail at  $(x_0, y_0)$  if and only if  $u_o^* = 0$  in any optimal solutions, where equal increase in all production factors led to the same amount of increase in production.

Improvement management software (PIM-DEA version 3.2) was used for DEA analysis.<sup>41</sup>

## Results

Descriptive statistics, concerning the inputs and outputs of 91 general hospitals during 2017, are presented in Table 2. The average hospital size is 236.57 beds, with a range of 100 to 711 beds. Full-time physicians ranged from 38 to 894, with a mean of 212. The number of nurses is on average 495 but ranged from 74 to 1,930. Full-time allied health personnel ranged from 37 to 1,149, with an average of 280.

**Table 2:** Descriptive statistics of the inputs and outputs of the 91 hospitals

|                          | Mean      | Standard Deviation | Min    | Max       |
|--------------------------|-----------|--------------------|--------|-----------|
| <b>Inputs</b>            |           |                    |        |           |
| Hospital beds            | 236.6     | 137.6              | 100    | 711       |
| Physicians               | 212.3     | 168.7              | 38     | 894       |
| Nurses                   | 495.2     | 403.6              | 74     | 1,930     |
| Allied Health Personnel  | 280.1     | 219.1              | 37     | 1,149     |
| <b>Outputs</b>           |           |                    |        |           |
| Outpatient visits        | 72,986.5  | 72,475.3           | 1,785  | 466,608   |
| Discharged patients      | 26,016.4  | 55,856.4           | 19     | 503,216   |
| Surgical operations      | 2,638.4   | 2,151.2            | 172    | 9,464     |
| Laboratory tests         | 965,840.8 | 1,095,415.6        | 794    | 5,512,774 |
| Radiology Investigations | 53,531.4  | 46,788.7           | 107    | 221,980   |
| Hospital mortality rate  | 0.0224    | 0.0212             | 0.0003 | 0.125     |

Concerning the outputs, the average number of patient visits to outpatient departments is 72,986 and ranged from 1,785 to 466,608 visits. Discharged patients receiving inpatient services during 2017 averaged 26,016, ranging from 19 to 503,216. Surgical operations ranged from 172 to 9,464 with a mean of 2,638 surgeries per hospital. Means for laboratory and radiology tests are 965840 and 53531 respectively, during 2017. Average mortality rate is 2.24%.

Table 3 presents the results of DEA models, summary statistics of average technical (CRS and VRS) efficiency, and scale (SE) efficiency scores, as well as concerning the return to scale.

**Table 3:** Technical efficiency scores and returns to the scale of the public hospitals in KSA

|                                                     | <b>CRS technical efficiency</b> | <b>VRS technical efficiency</b> | <b>Scale efficiency</b> | <b>CRS [N (%)]</b> | <b>IRS [N (%)]</b> | <b>DRS [N (%)]</b> |
|-----------------------------------------------------|---------------------------------|---------------------------------|-------------------------|--------------------|--------------------|--------------------|
| <b>All hospitals (n=91)</b>                         |                                 |                                 |                         |                    |                    |                    |
| Mean                                                | 0.76                            | 0.87                            | 0.87                    | 34 (37.4)          | 40 (44)            | 17 (18.6)          |
| Std. Dev.                                           | 0.23                            | 0.18                            | 0.18                    |                    |                    |                    |
| Min                                                 | 0.11                            | 0.30                            | 0.19                    |                    |                    |                    |
| No. full score                                      | 22 (24.2%)                      | 47                              | 25                      |                    |                    |                    |
| <b>Large hospitals: &gt;=500 beds (n= 8)</b>        |                                 |                                 |                         |                    |                    |                    |
| Mean                                                | 0.65                            | 0.75                            | 0.87                    | 2 (25)             | 1 (12.5)           | 5 (62.5)           |
| Std. Dev.                                           | 0.27                            | 0.30                            | 0.13                    |                    |                    |                    |
| Min                                                 | 0.28                            | 0.30                            | 0.59                    |                    |                    |                    |
| No. full score                                      | 1 (12.5)                        | 4                               | 1                       |                    |                    |                    |
| <b>Upper-medium hospitals: 300-499 beds (n= 22)</b> |                                 |                                 |                         |                    |                    |                    |
| Mean                                                | 0.76                            | 0.80                            | 0.94                    | 7 (31.8)           | 5 (22.7)           | 10 (45.5)          |
| Std. Dev.                                           | 0.19                            | 0.19                            | 0.07                    |                    |                    |                    |
| Min                                                 | 0.39                            | 0.41                            | 0.76                    |                    |                    |                    |
| No. full score                                      | 3 (13.6)                        | 7                               | 3                       |                    |                    |                    |
| <b>Lower-medium hospitals: 200-299 beds (n= 22)</b> |                                 |                                 |                         |                    |                    |                    |
| Mean                                                | 0.73                            | 0.79                            | 0.90                    | 10 (45.5)          | 10 (45.5)          | 2 (9.1)            |
| Std. Dev.                                           | 0.25                            | 0.19                            | 0.18                    |                    |                    |                    |
| Min                                                 | 0.11                            | 0.50                            | 0.22                    |                    |                    |                    |
| No. full score                                      | 4 (18.2)                        | 4                               | 4                       |                    |                    |                    |
| <b>Small hospitals: &lt;200 beds (n= 39)</b>        |                                 |                                 |                         |                    |                    |                    |
| Mean                                                | 0.79                            | 0.96                            | 0.82                    | 15 (38.5)          | 24 (61.5)          | 0 (0)              |
| Std. Dev.                                           | 0.23                            | 0.09                            | 0.22                    |                    |                    |                    |
| Min                                                 | 0.19                            | 0.67                            | 0.19                    |                    |                    |                    |
| No. full score                                      | 13 (33.3)                       | 31                              | 13                      |                    |                    |                    |

The average CRS technical efficiency score for MOH general hospitals is 0.76, with a standard deviation (SD) of 0.23, which indicates that these hospitals could reduce use of all their inputs on average by 24% without any reduction in the number of services provided. Also, the VRS technical score on average is 0.87 (SD 0.18). The distribution of technical, pure technical and scale efficiency scores is given in Figure 2.

Figure 2 to be inserted here

1  
2  
3 The lowest technical efficiency score reported is 0.11, but 22 hospitals out of 91 (24.2%) are  
4 both technically and scale efficient, which indicates that these hospitals utilize optimally their  
5 inputs. Among the inefficient hospitals 55 hospitals (60.4%) achieved efficiency scores of at  
6 least 0.50 efficiency level (Figure 2) and 14 hospitals (15.4%) reported efficiency scores below  
7 0.50. Average scale efficiency scores are 0.87, with (SD 0.18). Although 47 hospitals (52%)  
8 reported an efficient score on VRS (pure efficiency), only 25 (27%) hospitals are efficient on  
9 the scale.  
10  
11  
12  
13  
14  
15

16 Concerning the returns to scale , we have found that 34 hospitals (37.4%) operate under  
17 constant returns to scale (CRS); while 40 hospitals (44%) operate under increasing returns to  
18 scale (IRS), and 17 hospitals (18.6%) decreasing returns to scale, However, hospitals that were  
19 operating on either IRS or DRS needed to alter their capacity to operate on the optimal scale  
20 size i.e., at the constant return to the scale, which would be required to achieve technical  
21 efficiency.  
22  
23  
24  
25  
26  
27

28 We present in table 3 the efficiency scores of the 91 hospitals for each capacity (size category).  
29 From the capacity perspective, small hospitals had higher levels of technical (CRS and VRS)  
30 efficiencies than medium-sized (both lower- and upper-medium) and large hospitals. Table 3  
31 shows that small hospitals have on average technical efficiency of 0.79 (SD 0.23); one-third of  
32 the hospitals in this category are technically and the scale efficient. Average technical  
33 efficiency of lower-medium hospitals is 0.73 (SD 0.25), with a higher percentage of inefficient  
34 hospitals (81.8%), than for small hospitals. Although upper-medium-sized hospitals reported  
35 a slightly higher average technical efficiency score of 0.76 (SD 0.19), fewer hospitals in this  
36 category reported an efficient score, meaning a higher percentage of inefficiencies (86.4%).  
37 Large hospitals were the least efficient when compared to other categories. The average  
38 technical efficiency of large hospitals was 0.65 (SD 0.27), only one was technically efficient.  
39  
40  
41  
42  
43  
44  
45  
46  
47  
48

49 Regarding scale-efficiency scores, upper-medium (0.94) and lower-medium (0.90) sized  
50 hospitals operate at a more optimal scale than small (0.82) or large hospitals (0.87). Also,  
51 45.5% of lower-medium hospitals operate on the CRS, followed by small hospitals (38.5%).  
52 However, most of the remaining hospitals in these categories, i.e. lower-medium (45.5%) and  
53 small size (61.5%) hospitals are operating on IRS. In contrast, most large hospitals (62.5%)  
54 showed DRS, and two of them were on CRS, indicating a need to downsize these hospitals to  
55  
56  
57  
58  
59  
60

improve technical efficiency. Similarly, 45.5% of upper-medium-sized hospitals operate on DRS and one-third of this category are operating (CRS).

Table 4 shows the average efficiency scores in five geographical regions, however, based on the analysis of all 91 hospitals together. Hospitals in the central region reported the highest average technical efficiency score of 0.83 (SD 0.18), followed by eastern hospitals with an average score of 0.80 (SD 0.28). Hospitals in western KSA reported the least average score, 0.68 (SD 0.20).

**Table 4** Technical efficiency scores and returns to the scale of the hospitals categorized by location

|                                         | <b>CRS technical efficiency</b> | <b>VRS technical efficiency</b> | <b>Scale efficiency</b> | <b>CRS [N (%)]</b> | <b>IRS [N (%)]</b> | <b>DRS [N (%)]</b> |
|-----------------------------------------|---------------------------------|---------------------------------|-------------------------|--------------------|--------------------|--------------------|
| <b>South region hospitals (n= 22)</b>   |                                 |                                 |                         |                    |                    |                    |
| Mean                                    | 0.75                            | 0.89                            | 0.83                    | 9 (40.9)           | 9 (40.9)           | 4 (18.2)           |
| Std. Dev.                               | 0.25                            | 0.18                            | 0.23                    |                    |                    |                    |
| Min                                     | 0.11                            | 0.41                            | 0.22                    |                    |                    |                    |
| No. full score                          | 4 (18.2)                        | 13                              | 4                       |                    |                    |                    |
| <b>East region hospitals (n =8)</b>     |                                 |                                 |                         |                    |                    |                    |
| Mean                                    | 0.80                            | 0.85                            | 0.90                    | 4 (50)             | 1 (12.5)           | 3 (37.5)           |
| Std. Dev.                               | 0.28                            | 0.21                            | 0.16                    |                    |                    |                    |
| Min                                     | 0.27                            | 0.50                            | 0.54                    |                    |                    |                    |
| No. full score                          | 1 (12.5)                        | 4                               | 1                       |                    |                    |                    |
| <b>North region hospitals (n =17)</b>   |                                 |                                 |                         |                    |                    |                    |
| Mean                                    | 0.75                            | 0.84                            | 0.90                    | 7 (41.2)           | 9 (52.9)           | 1 (5.9)            |
| Std. Dev.                               | 0.28                            | 0.23                            | 0.20                    |                    |                    |                    |
| Min                                     | 0.19                            | 0.30                            | 0.19                    |                    |                    |                    |
| No. full score                          | 6 (35.3)                        | 9                               | 6                       |                    |                    |                    |
| <b>Central region hospitals (n =24)</b> |                                 |                                 |                         |                    |                    |                    |
| Mean                                    | 0.83                            | 0.89                            | 0.93                    | 10 (41.7)          | 11 (45.8)          | 3 (12.5)           |
| Std. Dev.                               | 0.18                            | 0.16                            | 0.10                    |                    |                    |                    |
| Min                                     | 0.49                            | 0.50                            | 0.69                    |                    |                    |                    |
| No. full score                          | 8 (33.3)                        | 12                              | 8                       |                    |                    |                    |
| <b>West region hospitals (n =20)</b>    |                                 |                                 |                         |                    |                    |                    |
| Mean                                    | 0.68                            | 0.85                            | 0.81                    | 4 (20)             | 10 (50)            | 6 (30)             |
| Std. Dev.                               | 0.20                            | 0.17                            | 0.17                    |                    |                    |                    |
| Min                                     | 0.37                            | 0.42                            | 0.46                    |                    |                    |                    |
| No. full score                          | 3 (15)                          | 9                               | 3                       |                    |                    |                    |

The percentage of efficient hospitals in the north (35.3%) and the central (33.3%) regions are higher than the other regions. The eastern, western and southern regions have a higher percentage of inefficient hospitals. Both central and southern regions reported relatively higher VRS efficiency score of 0.89. In terms of average scale efficiency scores, central region hospitals (0.93), and hospitals in the north- and east (both 0.90) were operating at more optimal scale than those in the west (0.81) and south (0.83). Half of the sample hospitals in the east region operate on CRS, followed by hospitals in the central and north regions (both 41%). The findings also revealed that 52.9 % of north region hospitals were operating on IRS, while 37.5% of east region hospitals were operating on DRS.

The performance analysis identified the slacks, which showed either excess input utilization or shortages of output production. Table 5 shows the average amount of slack in hospitals deemed inefficient. These results represent the combined scores of slack for all inefficient hospitals, for each input and output. Table 5 also shows the percentage of change (slacks) in the number of inputs or outputs required to eliminate the inefficiencies and achieve target levels.

**Table 5** Slacks evaluation for inefficient hospitals

| <b>Input slacks</b>      | Mean (SD)          | Percentage of change |
|--------------------------|--------------------|----------------------|
| Hospital beds            | 48.4 (76.6)        | -20.4%               |
| Physicians               | 47.5 (72.6)        | -22.4%               |
| Nurses                   | 102.9 (173.1)      | -20.8%               |
| Allied Health Personnel  | 58.38 (98.3)       | -20.84%              |
| <b>Output slacks</b>     |                    |                      |
| Outpatient visits        | 8866.1 (23712)     | 12.2%                |
| Discharged patients      | 3700.6 (8214.2)    | 14.2%                |
| Surgical operations      | 282.6 (730.9)      | 10.7%                |
| Laboratory tests         | 66105.6 (140332.4) | 6.8%                 |
| Radiology Investigations | 2204.6 (6944.1)    | 4.1%                 |
| Mortality rate           | 0.006 (0.014)      | 21.7%                |

In terms of inputs, results show that an excess of physicians was the main cause of inefficiencies in public hospitals. A feasible, achievable reduction in the number of physicians was on average 22.38 % of the current values (compared with the amounts given in Table 2). The next most substantial slack was observed in allied health personnel, at 20.84%. Surpluses of hospital beds and nurses were also important causes of inefficiency and should be reduced

1  
2  
3 on average by 20.44% and 20.77%, respectively. In addition to the input reduction, the  
4 average number of services should be increased to meet targets. Furthermore, the quality of  
5 health services in public hospitals would have improved with a decrease in the hospital  
6 mortality rate.  
7  
8  
9

## 10 11 Discussion

12  
13  
14 This study evaluated the technical efficiency of public hospitals affiliated to the KSA's MOH,  
15 using data envelopment analysis. Analysis showed 75% of sample hospitals could not utilize  
16 their intact resources to generate specified outputs. The average CRS technical efficiency  
17 score was 0.76, indicating that hospitals could produce their current level of outputs with 76%  
18 of inputs currently used, and thereby achieve efficiency. Efficiency scores ranged from 0.11  
19 to 1.00 (Figure 2), revealing considerable variations in efficiency scores among hospitals.  
20 Moreover, the average VRS technical efficiency and scale efficiency scores were both 0.87.  
21 This indicated that inefficiency might be due to administrative gaps to overcome external  
22 environmental factors, and limitations in managing internal operations in the hospitals.  
23 Notably, Helal and Elimam<sup>15</sup> in 2017, assessed the efficiency of health services at districts  
24 level in KSA based on MOH data 2014, found an average efficiency score of 0.92, and 45% of  
25 the districts achieved the technical efficiency score. An efficiency analysis of 20 public  
26 hospitals, under private sector management in KSA, found that 60% of the study sample had  
27 not achieved the efficient score, with an average score of 0.84.<sup>16</sup>  
28  
29  
30  
31  
32  
33  
34  
35  
36  
37  
38  
39  
40

41 Results of the study presented here suggest that small hospitals were relatively more  
42 technically efficient than medium-sized and large hospitals (Table 2). Other efficiency studies  
43 have reported similar findings: Gok<sup>27</sup> found that small hospitals achieved higher efficiency  
44 scores than medium-sized and large ones. This might be due to the differing locations and  
45 missions of small and large hospitals.<sup>27,36</sup> In this study's sample, small hospitals were mainly  
46 in peripheral cities and towns in KSA, which lacked other sources of public or private  
47 healthcare. Service provision in those hospitals might be relatively high compared to the  
48 health resources used. Large hospitals (500 or more beds) tended to be in larger cities in urban  
49 areas, where many other health providers shared the healthcare of much of the urban  
50 population, which might generate a relatively decreased level of health services production  
51 in respect of inputs used.  
52  
53  
54  
55  
56  
57  
58  
59  
60



1  
2  
3 Regarding the different missions, large hospitals consumed a high amount of health resources  
4 to meet the various requirements of comprehensive care.<sup>27</sup> Since some of these were  
5 teaching hospitals, however, teaching activities were not counted in the outcome  
6 measurements.<sup>27,28</sup> In such large hospitals, treatment processes might be more complicated,  
7 and some of the productions of these hospitals could not be assessed in the hospital  
8 outcomes.<sup>42</sup>  
9  
10  
11  
12  
13

14  
15 This study found 57 hospitals (62.6%) operating on non-optimal scale size; 44% were  
16 operating on the IRS, while 18.6% showed DRS (Table 3). This indicated that the efficiency of  
17 healthcare in KSA might be improved through downsizing of hospitals on DRS and reallocating  
18 these inputs to the hospitals operating in the IRS. Moreover, five out of eight large hospitals  
19 (500 or more beds) were operating on DRS, implying that to improve efficiency, they needed  
20 to reduce their production capacity. This is supported by other research findings.<sup>43</sup>  
21  
22  
23  
24  
25

26  
27 This study found that 61.5% of small hospitals had been operating on IRS, none was on DRS.  
28 It can thus be argued, like Kiadaliri and colleagues (2011), that the increase of capacity (inputs)  
29 of this category should be increased by reallocating resources from the larger hospitals for  
30 improving efficiency.<sup>43</sup> The efficient scale of public hospitals was in medium-sized  
31 establishments (200 to 499 beds). Although half of the hospitals located in the east were  
32 operating on the most productive scale size (CRS), three were operating on DRS. Around 53%  
33 of the hospitals in the north were operating on IRS, whereas 30% of western region hospitals,  
34 which reported the lowest efficiency scores, were operating on DRS.  
35  
36  
37  
38  
39  
40  
41

42  
43 Our analysis found that hospitals located in the west region were relatively less efficient than  
44 hospitals located in other regions. The central region hospitals appeared to be the efficient.  
45 Atilgan<sup>44</sup> reported in the same line as our findings, i.e. location-specific differences in  
46 efficiency scores for general MOH hospitals in Turkey. Atilgan argued that this could be due  
47 to case mix and/or case severity differences between hospitals. We observed that five out of  
48 eight large hospitals in our sample are located in the west region. We can argue that hospitals  
49 in the west region might be treating more severe cases than hospitals in other regions in KSA,  
50 which might have led to different levels of efficiency scores in hospitals across regions.<sup>18</sup>  
51  
52  
53  
54  
55  
56  
57  
58  
59  
60  
60 Another explanation could be that hospitals in this region consumed more inputs in  
anticipation of the annual pilgrimage season, for which government of KSA allocates more  
resources to such hospitals.

1  
2  
3  
4  
5  
6  
7  
8  
9  
10  
11  
12  
13  
14  
15  
16  
17  
18  
19  
20  
21  
22  
23  
24  
25  
26  
27  
28  
29  
30  
31  
32  
33  
34  
35  
36  
37  
38  
39  
40  
41  
42  
43  
44  
45  
46  
47  
48  
49  
50  
51  
52  
53  
54  
55  
56  
57  
58  
59  
60

Regardless of the capacity or location-based performance variations, improving the scale efficiency of hospitals would require long-term effort, reflected in amendments to health policies, strategic plans and the autonomy of hospital-managers.<sup>43</sup> The prevailing ability of patients to access health services should not be compromised while reallocating the resources to the other hospitals until Pareto optimality is achieved.<sup>9</sup>

The use of DEA can identify sources of inefficiency, helping hospital managers and health policy-makers to reach informed decisions.<sup>36</sup> The analysis showed that the number of full-time physicians was slightly larger notable reason for inefficiency than the other factors, with an average excess of 22.4%, from an input perspective. Other inputs among labour variables that showed a surplus in use were the number of nurses and the number of allied health personnel, in addition to excess number of hospital beds (capital variable). Analysis revealed a shortage of outputs production, e.g. hospitals needed to increase the number of outpatients and hospitalized inpatient services on average by 12.2% and 14.2% respectively, to be efficient.

Given our findings, health policy-makers may consider redeploying their labour forces from inefficient hospitals to more efficient ones.<sup>36,43</sup> Public hospitals can consider taking measures for utilizing existing beds effectively to increase efficiency. For example, in this study many large hospitals had been operating on DRS; however, most of the small hospitals were operating on IRS. Healthcare administrators should assess the legal conditions and regulations for the effective use of medical capacity in light of the findings of this slack analysis.

It had been argued by Afzali<sup>28</sup> and Hollingsworth<sup>12</sup> that many hospital databases are compromised by insufficient data on a broad range of hospital functions and care, e.g. preventive care, health promotion, staff development activities. Thus, improving hospital's databases through high quality data collection and processing techniques — including data from different health provision levels, capturing valid data that reflects the severity of cases and related health services, quality of care and pattern of activities — is very important.<sup>29,44</sup> Such improvement would facilitate further efficiency research by indicating weaknesses in healthcare production processes and consequently would guide policy-makers in potential reforms of health policy and directives.

1  
2  
3 In recent years, KSA has been facing the global trends of rising healthcare costs in addition to  
4 high growth rate of population and high prevalence of chronic diseases. The government thus  
5 realized that the existing healthcare financing system with oil revenue is unsustainable.<sup>45</sup> It  
6 thus can be argued that optimum use of existing health resources, which is a fundamental  
7 requirement for achieving universal health coverage as advised by the World Health  
8 organization<sup>46</sup> can appropriately be applied for KSA. An application of these findings are useful  
9 for high income, and Gulf countries in particular, which have the same health financing  
10 systems and comparable demand for health services.<sup>2,3,14</sup> Our findings from this current  
11 analysis of KSA public hospitals indicated that there is large scope for improving efficiency in  
12 utilizing healthcare resources. We recommend the policy-makers to consider the appropriate  
13 use of resources within hospitals as well as reallocate resources across hospitals, given the  
14 findings of this research. Thus, to meet the efficient use of health resources to ensure the  
15 maximum value for money, which is expected to contribute significantly towards achieving  
16 universal health coverage in KSA.  
17  
18  
19  
20  
21  
22  
23  
24  
25  
26  
27  
28

29 The study faced the challenges of finding data on economic values of the inputs, also severity  
30 of cases and quality of services of the outputs. We, however, could use the mortality rate as  
31 the proxy for quality of services. The performance assessment is devoted on how to utilize  
32 optimally the resources of the health sector in order to provide the given levels of health  
33 services. Thus, we rationally adopted input orientation in the assessment. However, DEA  
34 methodology also permits the assumption of output orientation. We did not apply output-  
35 oriented DEA models because outputs of different type than the ones used in the current  
36 study would need to be available.  
37  
38  
39  
40  
41  
42  
43

44 In this study we provide the optimal levels of resources that render efficient each hospital  
45 given the health services levels that each one of them provides. Further to estimating the  
46 optimal levels of resources, a different yet important assessment is to examine the allocation  
47 of these resources among the hospitals. This extension is left for future research. Despite a  
48 few limitations, the study site (KSA), and data sources might create strong interest among  
49 policy-makers, stakeholders, researchers and academics. This is the first research study of  
50 technical efficiency based on official data from KSA, that has considered public hospital  
51 capacities and geographical locations.  
52  
53  
54  
55  
56  
57  
58  
59  
60

## Conclusions

Given the scarcity of resources, growing expenditure on health and demand for health services, more attention should be paid to improving the efficiency of healthcare by better utilization of current resources. In this study, inefficiency existed in most public hospitals, and these could reduce their inputs by 24% without any reduction in service provision. Small hospitals and hospitals in the central region of KSA were relatively more efficient. A high proportion of hospitals were operating at non-optimal scale size, while an efficient scale of operation was observed in medium-sized hospitals. The finding suggests that it would be helpful to adjust production capacity by downsizing hospitals operating on DRS and reallocating the resources to hospitals on the IRS, as reflected in the scale analysis. Performance analysis shows the surplus of the health workers and a shortage of health services to be major causes of inefficiency, implying that health regulators might redeploy their labour forces for effective utilization of medical capacity. A possible reallocation of resource must take place without compromising patients' current access to public-funded health services.

## Acknowledgement

We are grateful for the Ministry of Education and the government of Saudi Arabia for unlimited support. The authors would like to thank of the Administration of Statistics and Information and the Administration of Research and Studies in the Ministry of Health for providing access to the hospital's databases. Special gratitude to Mr Nabil A. Othman and Ms Nuwayyir Alshalawi at Administration of Statistics and Information for their contributions through permitting to use the administration's access to the necessary databases to complete the data collection.

## Contributors

AA, LN and JK contributed to conceptualizing the research question, study design and settings and literature search. AA contributed to data collection and variable extraction. AA and JK conducted the data analysis, interpretation, and writing the manuscript. AA, LN and JK contributed to writing, reviewing and revising the manuscript. All authors finally reviewed the manuscript critically and approved the final version for submission.

## Funding

There is no funding agency in the public, commercial or not-for-profit sectors to report for this submission.

## Competing interest

None declared.

## Data sharing statement

Data were extracted from the hospital databases at Administration of Statistics and Information in The Ministry of Health. Additional data are available if requested.

## Ethics approval

Ethics approval was obtained from the Ethics Committee of Institutional Review Board (IRB) of King Fahad Medical City, the Ministry of Health in Saudi Arabia (IRB log No. 18-166E).

## Patient consent for publication

Not required.

## References

1. Khoja T, Rawaf S, Qidwai W *et al*. Health care in Gulf Cooperation Council countries: a review of challenges and opportunities. *Cureus* 2017;9(8):e1586. DOI 10.7759/cureus.1586.
2. Ardent Advisory & Accounting. *GCC healthcare sector report. A focus area for governments*. Abu Dhabi, UAE, 2015 Accessed: January 2018: DOI: <http://www.ardentadvisory.com/files/GCC-Healthcare-Sector-Report.pdf>
3. Ram P. Management of healthcare in the Gulf Cooperation Council (GCC) countries with special reference to Saudi Arabia. *International Journal of Academic Research in Business and Social Sciences* 2014; 4(12). DOI: 10.6007/IJARBS/v4-i11/1326.
4. The World Bank. *2019 Country Data*. Available at: <https://data.worldbank.org/country/saudi-arabia> (accessed January 2019).
5. MOH portal.com. *2017 Annual Statistical Book* Available at: <https://www.moh.gov.sa/en/Ministry/Statistics/book/Documents/ANNUAL-STATISTICAL-BOOK-1438H.pdf> (Accessed Oct. 2018).

- 1  
2  
3 6. Mourshed M, Hediger V, Lambert T. Gulf Cooperation Council healthcare: challenges  
4 and opportunities. 2007; *Arab World Competitiveness Report (Part 5)*;55–64, World  
5 Economic Forum, Geneva, Switzerland 2007. DOI:  
6 [http://citeseerx.ist.psu.edu/viewdoc/download?doi=10.1.1.183.7279&rep=rep1&typ](http://citeseerx.ist.psu.edu/viewdoc/download?doi=10.1.1.183.7279&rep=rep1&type=pdf)  
7 [e=pdf](http://citeseerx.ist.psu.edu/viewdoc/download?doi=10.1.1.183.7279&rep=rep1&type=pdf)  
8  
9
- 10  
11  
12 7. MOH portal.com. *Ministry of Health Strategic Plan 2010–2020*. Available at:  
13 <https://www.moh.gov.sa/Portal/WhatsNew/Documents/OKIstragi260p.pdf>. (Accesse  
14 d October 2018).  
15  
16
- 17  
18 8. Albejaidi F. Healthcare system in Saudi Arabia: an analysis of structure, total quality  
19 management and future challenges. *Journal of Alternative Perspectives in the Social*  
20 *Sciences* 2010;2(2):794-818.  
21  
22
- 23 9. Jacobs R, Smith P, Street A. *Measuring efficiency in health care: analytic techniques*  
24 *and health policy*. Cambridge; Cambridge University, p3–39/91-127, 2006.  
25  
26
- 27 10. Farrell MJ. The Measurement of Productive Efficiency. *Journal of the Royal Statistical*  
28 *Society* 1957;120(3):253–290.  
29  
30
- 31 11. Hanson K, Atuyambe L, Kamwanga J *et al*. Towards improving hospital performance in  
32 Uganda and Zambia: reflections and opportunities for autonomy. *Health Policy*  
33 2002;61, 73–94.  
34  
35
- 36 12. Hollingworth B. Non-parametric and parametric applications measuring efficiency in  
37 health care. *Healthcare Management Science* 2003;6:203–218.  
38  
39
- 40 13. Kelly E, Stoye G, Vera-Hernández M. Public hospital spending in England: evidence  
41 from National Health Service administrative records. *Fiscal Studies* 2016;37(3-4),  
42 pp.433–459.  
43  
44
- 45 14. Alatawi A, Ahmed S, Niessen L *and Khan J*. Systematic review and meta-analysis of  
46 public hospital efficiency studies in Gulf region and selected countries in similar  
47 settings. *Cost Effectiveness and Resource Allocation* 2019;17(17).  
48 [Doi.org/10.1186/s12962-019-0185-4](https://doi.org/10.1186/s12962-019-0185-4)  
49  
50
- 51 15. Helal S, Elimam H. Measuring the efficiency of health services areas in Kingdom of  
52 Saudi Arabia using data envelopment analysis (DEA): a comparative study between  
53 the years 2014 and 2006. *International Journal of Economics and Finance* 2017;9(4)  
54 pp172–184.  
55  
56  
57  
58  
59  
60

16. Abou El-Seoud M. Measuring efficiency of reformed public hospitals in Saudi Arabia: An application of data envelopment analysis. *International Journal of Economics and Management Sciences* 2013;2(9):44–53.
17. Hussey P, de Vries H, Romley J *et al*. A systematic review of health care efficiency measures. *Health Services Research and Educational Trust* 2009; 44(3):784–805. DOI: 10.1111/j.1475-6773.2008.00942.
18. Kiadaliri A, Jafari M, Gerdtham U. Frontier-based techniques in measuring hospital efficiency in Iran: a systematic review and meta-regression analysis. *BMC Health Services Research* 2013;13:312. <http://www.biomedcentral.com/1472-6963/13/312>
19. Hollingsworth B. The measurement of efficiency and productivity of health care delivery. *Health Economics* 2008;17:1107–28. DOI: 10.1002/hec.1391
20. Varabyova Y, Müller JM. The efficiency of health care production in OECD countries: a systematic review and meta-analysis of cross-country comparisons. *Health Policy* 2016;120(3) 252–263. <http://dx.doi.org/10.1016/j.healthpol.2015.12.005>
21. Al-Homayan A, Shamsudin F, Subramaniam C, Islam R. Analysis of health care system — resources and nursing sector in Saudi Arabia. *Advances in Environmental Biology* 2013;7(9), pp. 2584-2592.
22. Almalki M, FitzGerald G, Clark M. Health care system in Saudi Arabia: an overview. *Eastern Mediterranean Health Journal* 2011;17(10).
23. MOH portal.com. 2015 Annual Statistical Book. Available at: <https://www.moh.gov.sa/en/Ministry/Statistics/book/Documents/StatisticalBook-1436.pdf>.
24. Atilgan E. The technical efficiency of hospital inpatient care services: an application for Turkish public hospitals. *Isletme ve Ekonomi Arastirmalari Dergisi/Business and Economics Research Journal* 2016;7(2): 203–214. DOI: 10.20409/berj.2016217537.
25. Pelone F, Kringos, DF, Romaniello A *et al*. Primary care efficiency measurement using data envelopment analysis: a systematic review. *Journal of Medical Systems* 2015;; 39(1):156.
26. Cooper W, Seiford L, Tone K. Data envelopment analysis: a comprehensive text with models, applications, references and DEA-solver software. Springer, New York, p1-85, 2007. DOI: 10.1007/978-0-387-45283-8

- 1  
2  
3  
4  
5  
6  
7  
8  
9  
10  
11  
12  
13  
14  
15  
16  
17  
18  
19  
20  
21  
22  
23  
24  
25  
26  
27  
28  
29  
30  
31  
32  
33  
34  
35  
36  
37  
38  
39  
40  
41  
42  
43  
44  
45  
46  
47  
48  
49  
50  
51  
52  
53  
54  
55  
56  
57  
58  
59  
60
27. Gok MS, Sezen B. Analyzing the ambiguous relationship between efficiency, quality and patient satisfaction in healthcare services: the case of public hospitals in Turkey. *Health Policy* 2013;111(3), pp 290-300. <http://dx.doi.org/10.1016/j.healthpol.2013.05.010>
28. Afzali HH, Moss JR, Mahmood MA. A conceptual framework for selecting the most appropriate variables for measuring hospital efficiency with a focus on Iranian public hospitals. *Health Services Management Research* 2009;22(2):81–91. DOI: 10.1258/hsmr.2008.008020
29. Sahin I, Ozcan YA. Public sector hospital efficiency for provincial markets in Turkey. *Journal of Medical Systems* 2000;24(6), pp 307–320.
30. Ahmed S, Hasan MZ, MacLennan M, et al. Measuring the efficiency of health systems in Asia: a data envelopment analysis. *BMJ Open* 2019;9: e022155. doi:10.1136/bmjopen-2018-022155
31. Dyson R, Allen R, Camanho A *et al.* Pitfalls and protocols in DEA. *European Journal of Operational Research* 2001;132(2):245–259.
32. Hollingsworth B. Evaluating efficiency of a health care system in the developed world. *Encyclopedia of Health Economics* 2014;1(18) pp.292-299.
33. Charnes A, Cooper W, Rhodes E. Measuring the efficiency of decision-making units. *European Journal of Operational Research* 1978;2(6), 429–444 (1978)
34. Banker R, Charnes A, Cooper W. Some models for estimating technical and scale inefficiencies in data envelopment analysis. *Management Science* 1984;30(9), 1078–1092
35. Chuang CL, Chang PC, Lin RH. An efficiency data envelopment analysis model reinforced by classification and regression tree for hospital performance evaluation. *Journal of Medical Systems* 2010;35(5):1075-83. Doi:10.1007/s10916-010-9598-5.
36. Gok MS, Altindag E. Analysis of the cost and efficiency relationship: experience in the Turkish pay for performance system. *European Journal of Health Economics* 2015;16(5), pp 459–469. DOI 10.1007/s10198-014-0584-6
37. O’Neill L, Rauner M, Heidenberger K *et al.* A cross-national comparison and taxonomy of DEA-based hospital efficiency studies. *Socio-Economic Planning Sciences* 2008;42:158–189.



- 1  
2  
3 38. Mahate A, Hamidi S. Frontier efficiency of hospitals in United Arab Emirates: An  
4 application of data envelopment analysis. *Journal of Hospital Administration* 2016;5(1)  
5 pp7–16. DOI: 10.1007/s10916-014-0156-4  
6  
7  
8  
9 39. Ramanathan R. Operations assessment of hospitals in the Sultanate of Oman.  
10 *International Journal of Operations and Production Management*, 2005;25(1) pp 39-  
11 54. DOI: 10.1007/s10916-014-0156-4  
12  
13  
14 40. Charnes, A. and Cooper, W.W. Programming with Fractional Functions. *Naval*  
15 *Research Logistic Quarterly* (1962;(9): 181-186. DOI: org/10.1002/nav.3800090303  
16  
17  
18 41. Emrouznejad A, Thanassoulis E. *Performance Improvement Management Software:*  
19 *PIM-DEAsoft-V3.0 User Guide* May 2011; www.DEAsoftware.co.uk, Performance  
20 Improvement Management Limited, UK ISBN: 1-85449-412-2. Available at:  
21 https://deazone.com/en/software  
22  
23  
24  
25 42. Shahhoseini R, Tofighi S, Jaafaripooyan E *et al.* Efficiency measurement in developing  
26 countries: application of data envelopment analysis for Iranian hospitals. *Health*  
27 *Services Management Research* 2010;24(2):75-80. DOI: 10.1258/hsmr.2010.010017  
28  
29  
30 43. Kiadaliri A, Haghparast-Bidgoli H, Zarei A. Measuring efficiency of general hospitals in  
31 the south of Iran. *World Applied Sciences Journal* 2011;13(6): 1310–1316.  
32  
33  
34 44. Afzali HH, Moss JR, Mahmood AM. Exploring health professionals' perspectives on  
35 factors affecting Iranian hospital efficiency and suggestions for improvement.  
36 *International Journal of Health Planning and Management* 2011;26: e17–e29. DOI:  
37 10.1002/hpm.1035  
38  
39  
40  
41 45. Al-Salem AA. Renovation of financing healthcare services in Kingdom of Saudi Arabia,  
42 by implementing National Health Insurance (NHI). *European Journal of*  
43 *Pharmaceutical and Medical Research*, 2018,5(9), 439-448.  
44  
45  
46  
47 46. World Health Organization. 2010. Health systems financing: the path to universal  
48 coverage, World Health Report 2010, Geneva.  
49  
50  
51  
52  
53

## 54 Tables

55  
56 Table 1: Budget appropriations for the MOH with respect to government budget (SR =  
57 Saudi Riyal).  
58  
59  
60

1  
2  
3 Table 2: Descriptive statistics of the inputs and outputs of the 91 hospitals.  
4

5 Table 3: Technical efficiency scores and return to the scale of the public hospitals in KSA.  
6  
7

8 Table 4 Technical efficiency scores and returns to the scale of the hospitals categorized by  
9 location.  
10

11  
12 Table 5 Slacks evaluation for inefficient hospitals.  
13  
14

### 15 **Figures**

16  
17 Figure 1: Number of hospitals and hospital beds in each capacity and geographical  
18 location, 2017.  
19  
20

21  
22 Figure 2. Distribution of technical efficiency scores of the hospitals on technical (CRS),  
23 pure technical (VRS) and scale efficiencies.  
24  
25  
26  
27  
28  
29  
30  
31  
32  
33  
34  
35  
36  
37  
38  
39  
40  
41  
42  
43  
44  
45  
46  
47  
48  
49  
50  
51  
52  
53  
54  
55  
56  
57  
58  
59  
60

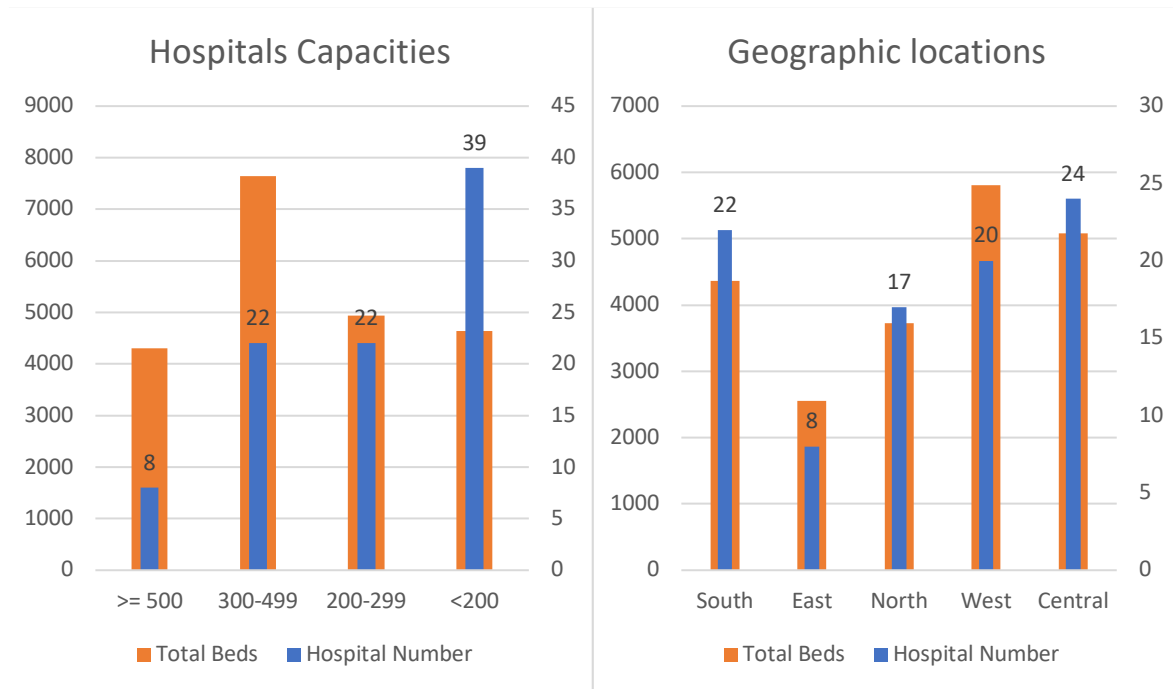

Figure 1: Number of hospitals and hospital beds in each capacity and geographical location, 2017.

1  
2  
3  
4  
5  
6  
7  
8  
9  
10  
11  
12  
13  
14  
15  
16  
17  
18  
19  
20  
21  
22  
23  
24  
25  
26  
27  
28  
29  
30  
31  
32  
33  
34  
35  
36  
37  
38  
39  
40  
41  
42  
43  
44  
45  
46  
47  
48  
49  
50  
51  
52  
53  
54  
55  
56  
57  
58  
59  
60

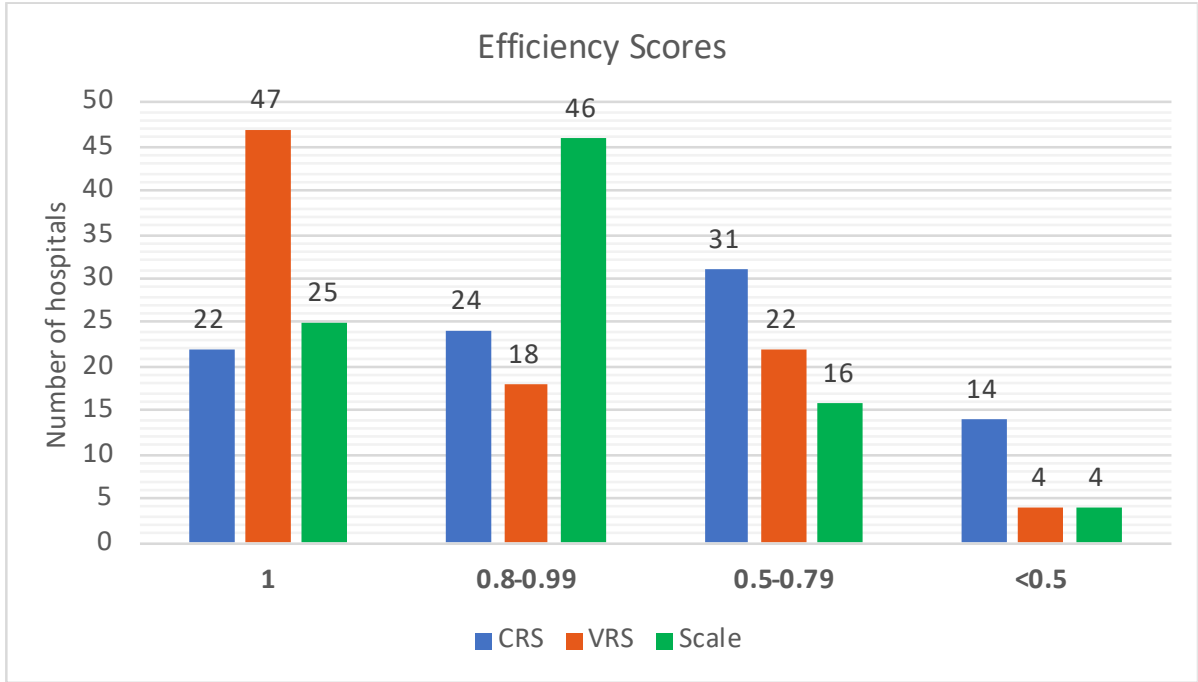

Figure 2. Distribution of technical efficiency scores of the hospitals on technical (CRS), pure technical (VRS) and scale efficiencies.

**STROBE 2007 (v4) Statement—Checklist of items that should be included in reports of *cross-sectional studies***

| Section/Topic                | Item # | Recommendation                                                                                                                                                                       | Reported on page # |
|------------------------------|--------|--------------------------------------------------------------------------------------------------------------------------------------------------------------------------------------|--------------------|
| <b>Title and abstract</b>    | 1      | (a) Indicate the study's design with a commonly used term in the title or the abstract                                                                                               | 0                  |
|                              |        | (b) Provide in the abstract an informative and balanced summary of what was done and what was found                                                                                  | 1                  |
| <b>Introduction</b>          |        |                                                                                                                                                                                      |                    |
| Background/rationale         | 2      | Explain the scientific background and rationale for the investigation being reported                                                                                                 | 2,3                |
| Objectives                   | 3      | State specific objectives, including any prespecified hypotheses                                                                                                                     | 4                  |
| <b>Methods</b>               |        |                                                                                                                                                                                      |                    |
| Study design                 | 4      | Present key elements of study design early in the paper                                                                                                                              | 4                  |
| Setting                      | 5      | Describe the setting, locations, and relevant dates, including periods of recruitment, exposure, follow-up, and data collection                                                      | 6,7                |
| Participants                 | 6      | (a) Give the eligibility criteria, and the sources and methods of selection of participants                                                                                          | n/a                |
| Variables                    | 7      | Clearly define all outcomes, exposures, predictors, potential confounders, and effect modifiers. Give diagnostic criteria, if applicable                                             | 7,8                |
| Data sources/<br>measurement | 8*     | For each variable of interest, give sources of data and details of methods of assessment (measurement). Describe comparability of assessment methods if there is more than one group | 4,5,6,7            |
| Bias                         | 9      | Describe any efforts to address potential sources of bias                                                                                                                            | n/a                |
| Study size                   | 10     | Explain how the study size was arrived at                                                                                                                                            | 7                  |
| Quantitative variables       | 11     | Explain how quantitative variables were handled in the analyses. If applicable, describe which groupings were chosen and why                                                         | 6,7,8              |
| Statistical methods          | 12     | (a) Describe all statistical methods, including those used to control for confounding                                                                                                | 5,6                |
|                              |        | (b) Describe any methods used to examine subgroups and interactions                                                                                                                  | 7                  |
|                              |        | (c) Explain how missing data were addressed                                                                                                                                          | 7                  |
|                              |        | (d) If applicable, describe analytical methods taking account of sampling strategy                                                                                                   | 8                  |
|                              |        | (e) Describe any sensitivity analyses                                                                                                                                                | n/a                |
| <b>Results</b>               |        |                                                                                                                                                                                      |                    |

|                          |     |                                                                                                                                                                                                              |            |
|--------------------------|-----|--------------------------------------------------------------------------------------------------------------------------------------------------------------------------------------------------------------|------------|
| Participants             | 13* | (a) Report numbers of individuals at each stage of study—eg numbers potentially eligible, examined for eligibility, confirmed eligible, included in the study, completing follow-up, and analysed            | n/a        |
|                          |     | (b) Give reasons for non-participation at each stage                                                                                                                                                         | n/a        |
|                          |     | (c) Consider use of a flow diagram                                                                                                                                                                           | n/a        |
| Descriptive data         | 14* | (a) Give characteristics of study participants (eg demographic, clinical, social) and information on exposures and potential confounders                                                                     | 8,9        |
|                          |     | (b) Indicate number of participants with missing data for each variable of interest                                                                                                                          | 7          |
| Outcome data             | 15* | Report numbers of outcome events or summary measures                                                                                                                                                         | 9,10,11,12 |
| Main results             | 16  | (a) Give unadjusted estimates and, if applicable, confounder-adjusted estimates and their precision (eg, 95% confidence interval). Make clear which confounders were adjusted for and why they were included | 9,10       |
|                          |     | (b) Report category boundaries when continuous variables were categorized                                                                                                                                    | 9,10,11    |
|                          |     | (c) If relevant, consider translating estimates of relative risk into absolute risk for a meaningful time period                                                                                             | n/a        |
| Other analyses           | 17  | Report other analyses done—eg analyses of subgroups and interactions, and sensitivity analyses                                                                                                               | 11,12      |
| <b>Discussion</b>        |     |                                                                                                                                                                                                              |            |
| Key results              | 18  | Summarise key results with reference to study objectives                                                                                                                                                     | 12,13,14   |
| Limitations              | 19  | Discuss limitations of the study, taking into account sources of potential bias or imprecision. Discuss both direction and magnitude of any potential bias                                                   | 15         |
| Interpretation           | 20  | Give a cautious overall interpretation of results considering objectives, limitations, multiplicity of analyses, results from similar studies, and other relevant evidence                                   | 14,15      |
| Generalisability         | 21  | Discuss the generalisability (external validity) of the study results                                                                                                                                        | 13,14,15   |
| <b>Other information</b> |     |                                                                                                                                                                                                              |            |
| Funding                  | 22  | Give the source of funding and the role of the funders for the present study and, if applicable, for the original study on which the present article is based                                                | 16         |

\*Give information separately for cases and controls in case-control studies and, if applicable, for exposed and unexposed groups in cohort and cross-sectional studies.

**Note:** An Explanation and Elaboration article discusses each checklist item and gives methodological background and published examples of transparent reporting. The STROBE checklist is best used in conjunction with this article (freely available on the Web sites of PLoS Medicine at <http://www.plosmedicine.org/>, Annals of Internal Medicine at <http://www.annals.org/>, and Epidemiology at <http://www.epidem.com/>). Information on the STROBE Initiative is available at [www.strobe-statement.org](http://www.strobe-statement.org).
